# Supplementary material
Source: publisher figshare collection journal article supplement (https://gsapubs.figshare.com/articles/dataset/_/13020647)

AE-389 (row 1)      200x      Feb.08/17

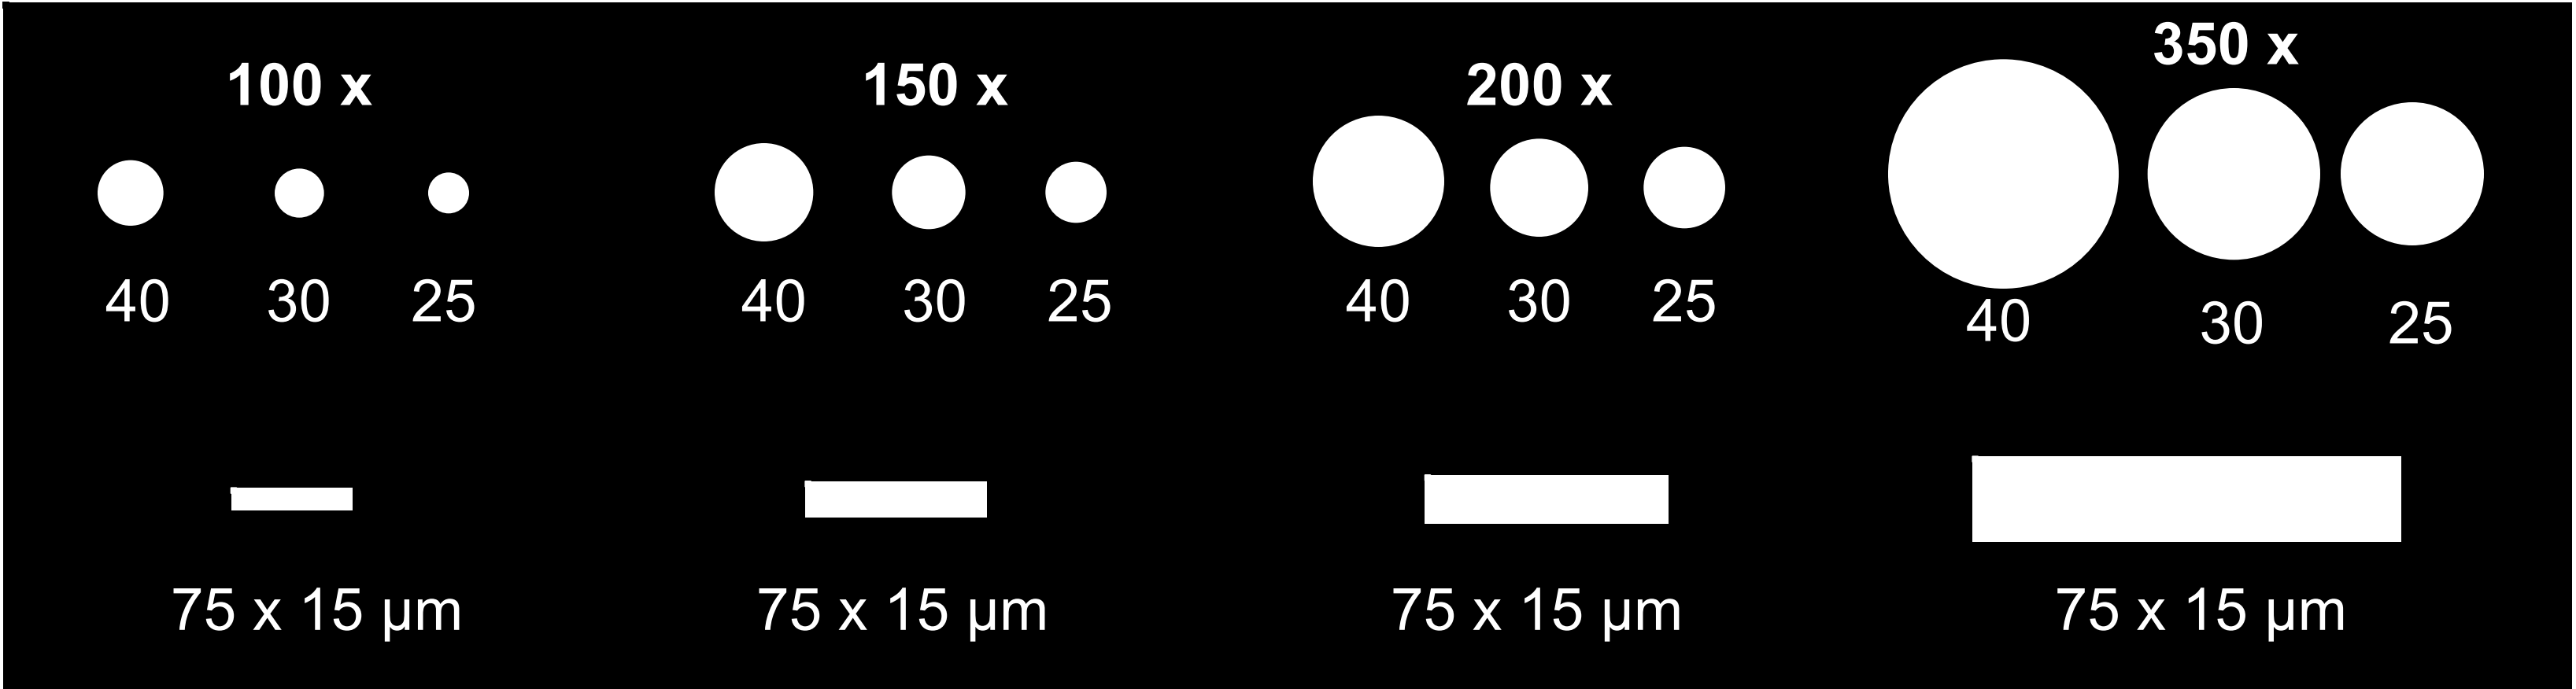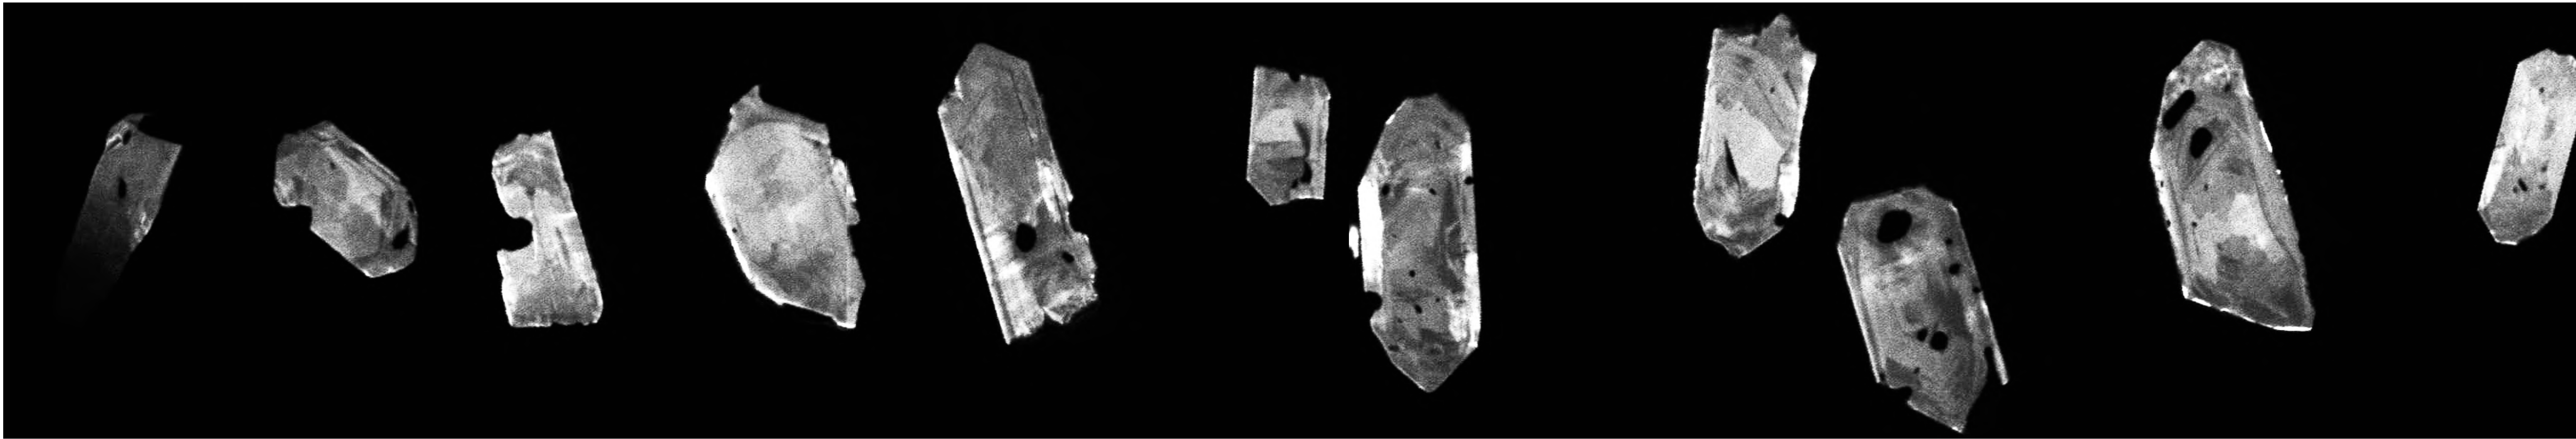

AE-389 (row 2) 200x

Feb.08/17

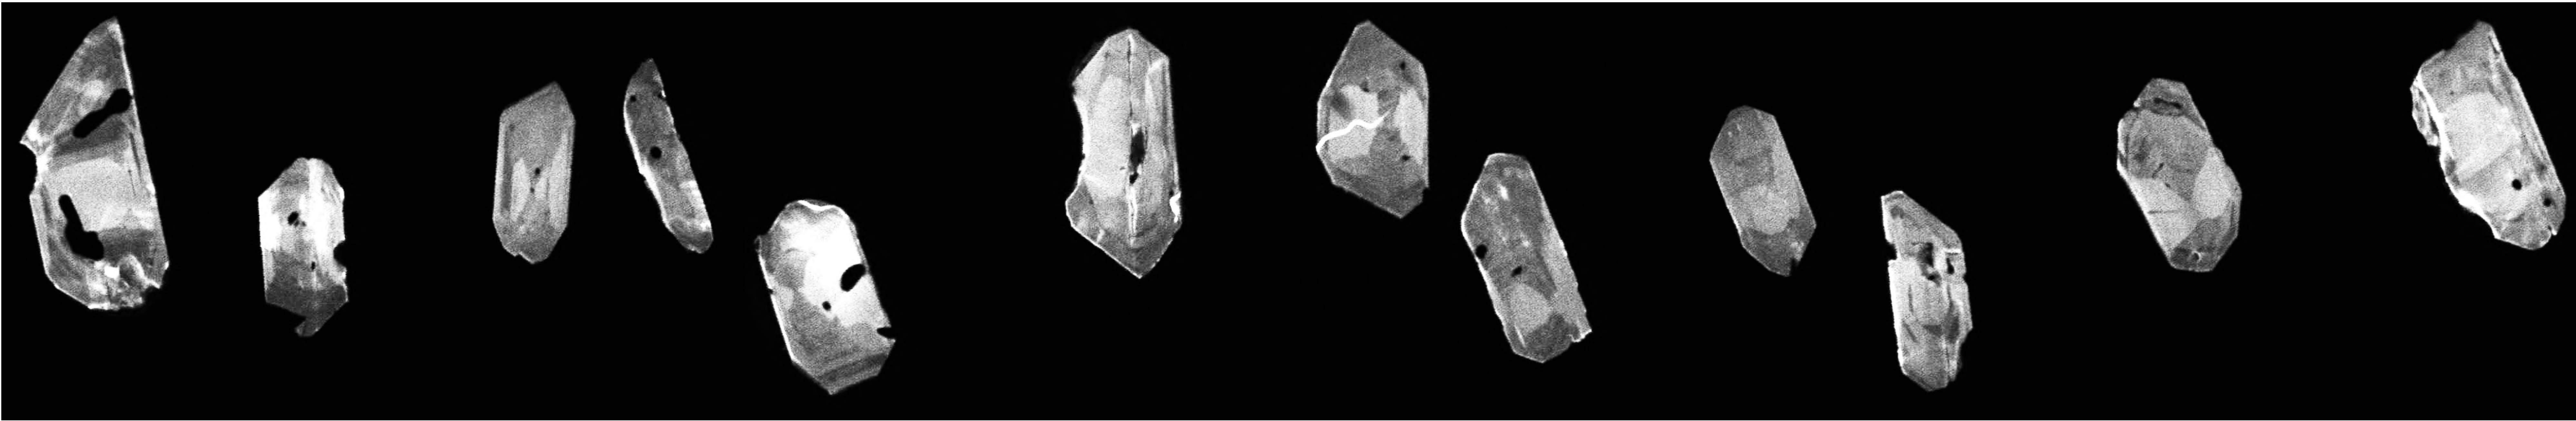



AE-389 (row 3) 200x

Feb.08/17

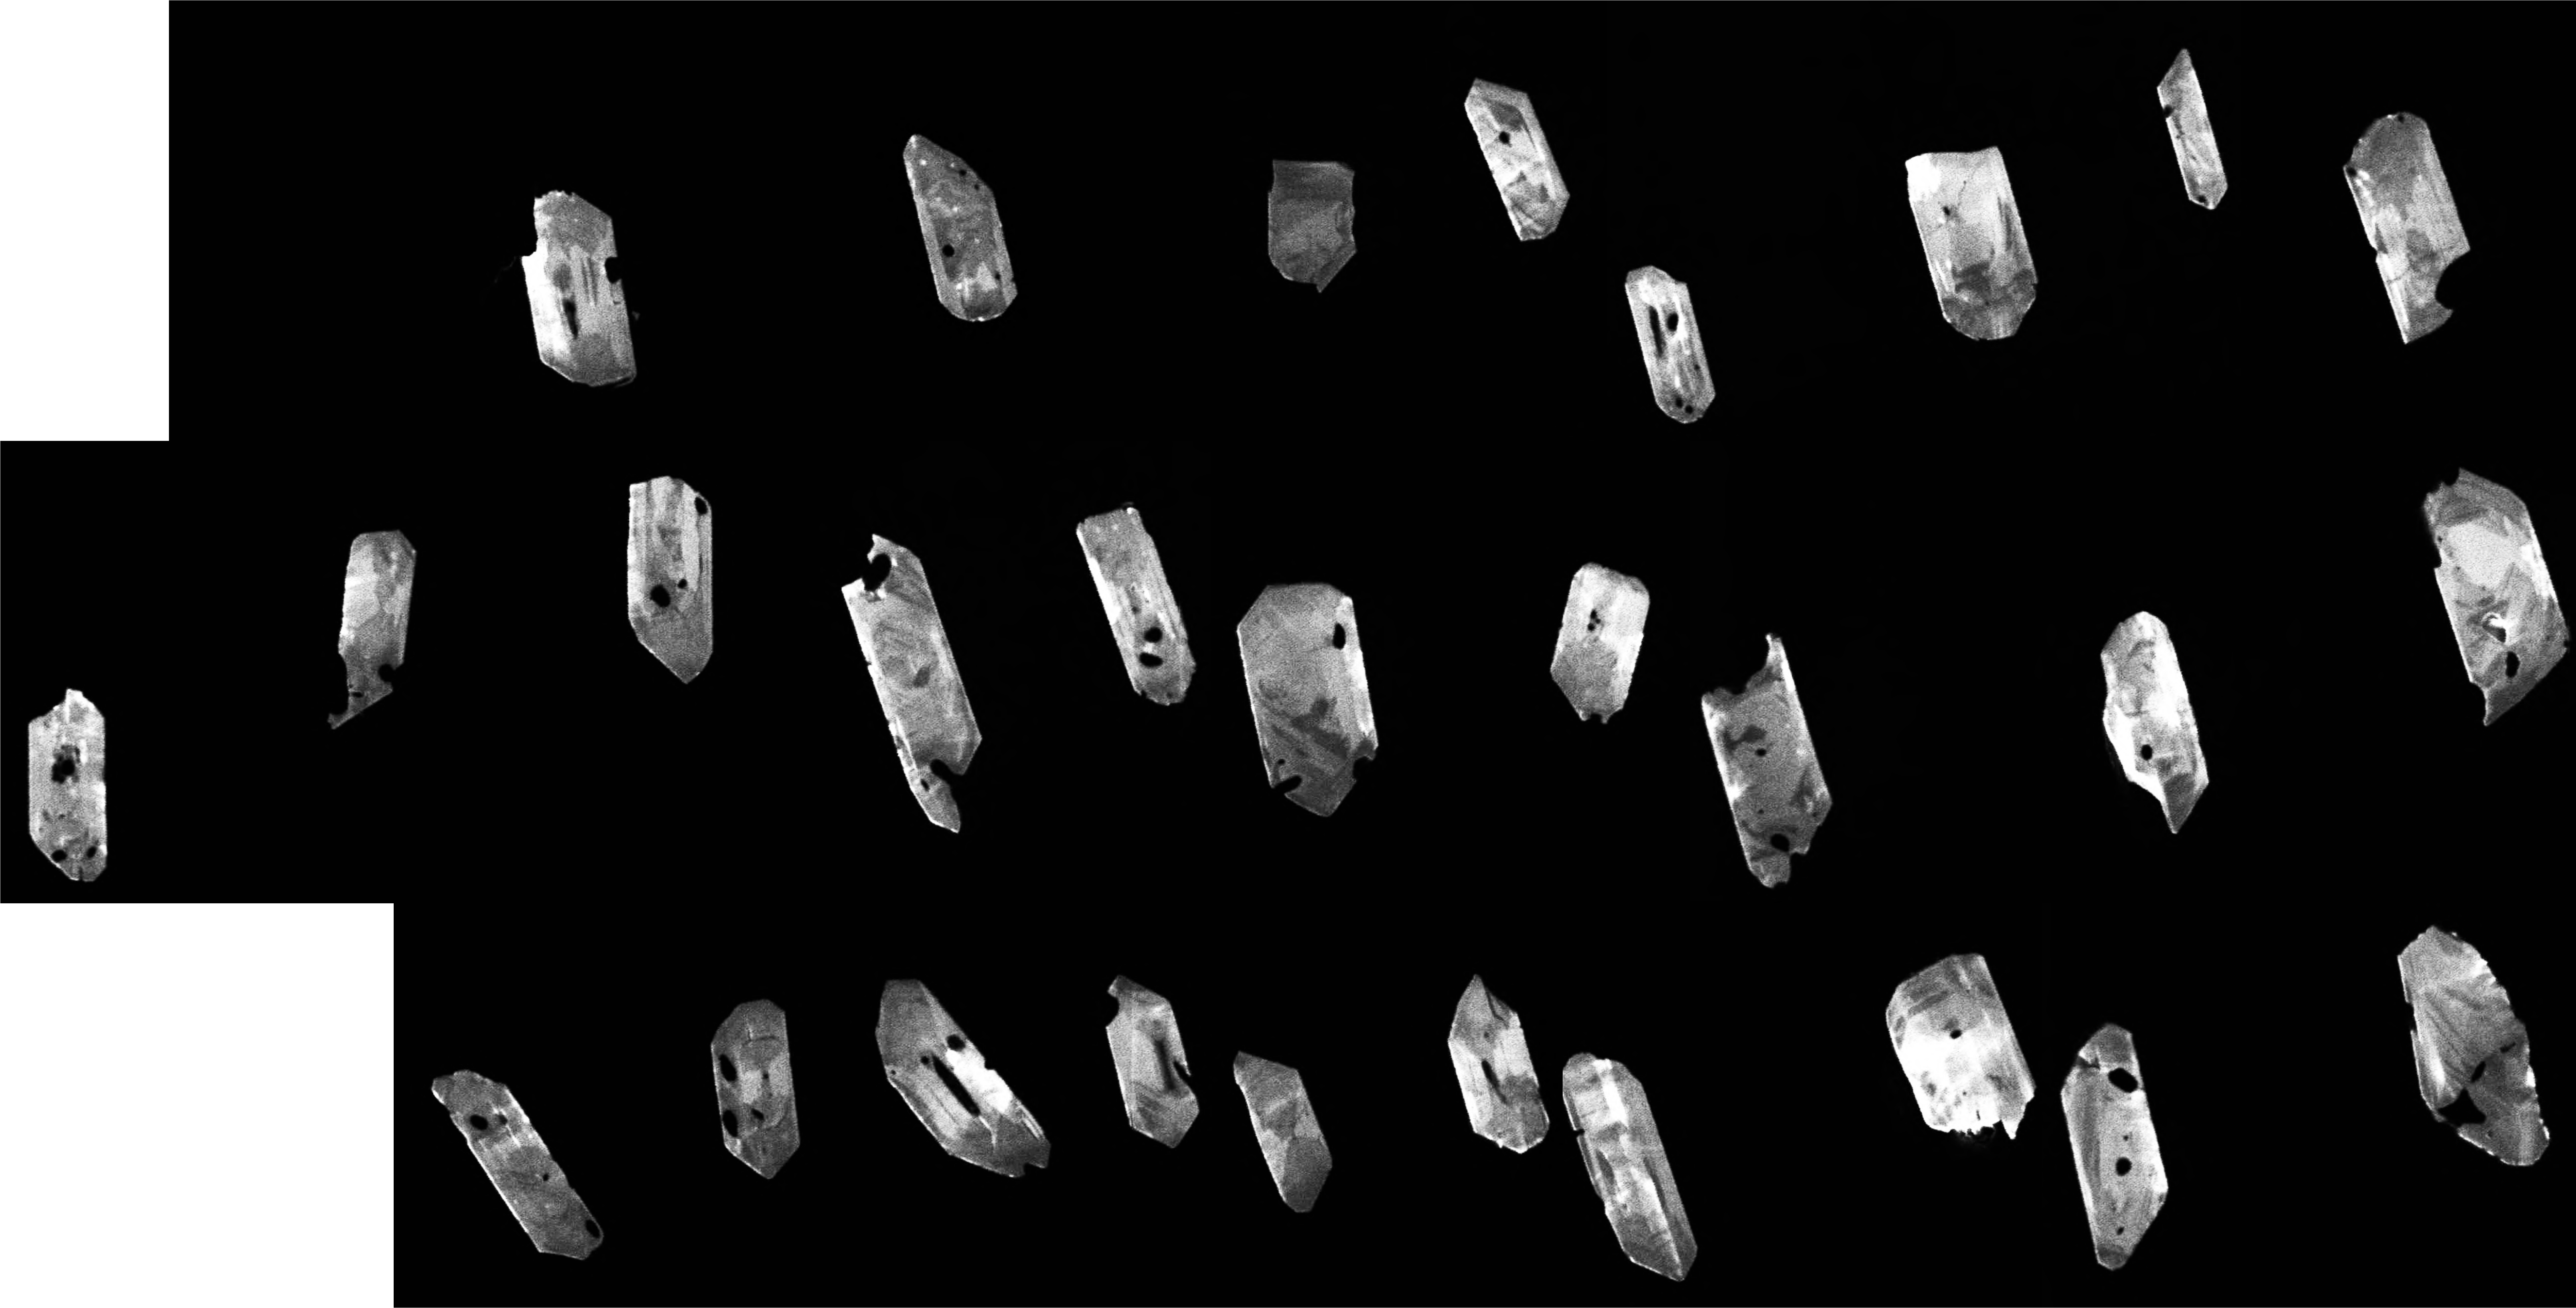



AE-389 (row 4) 200x

Feb.08/17

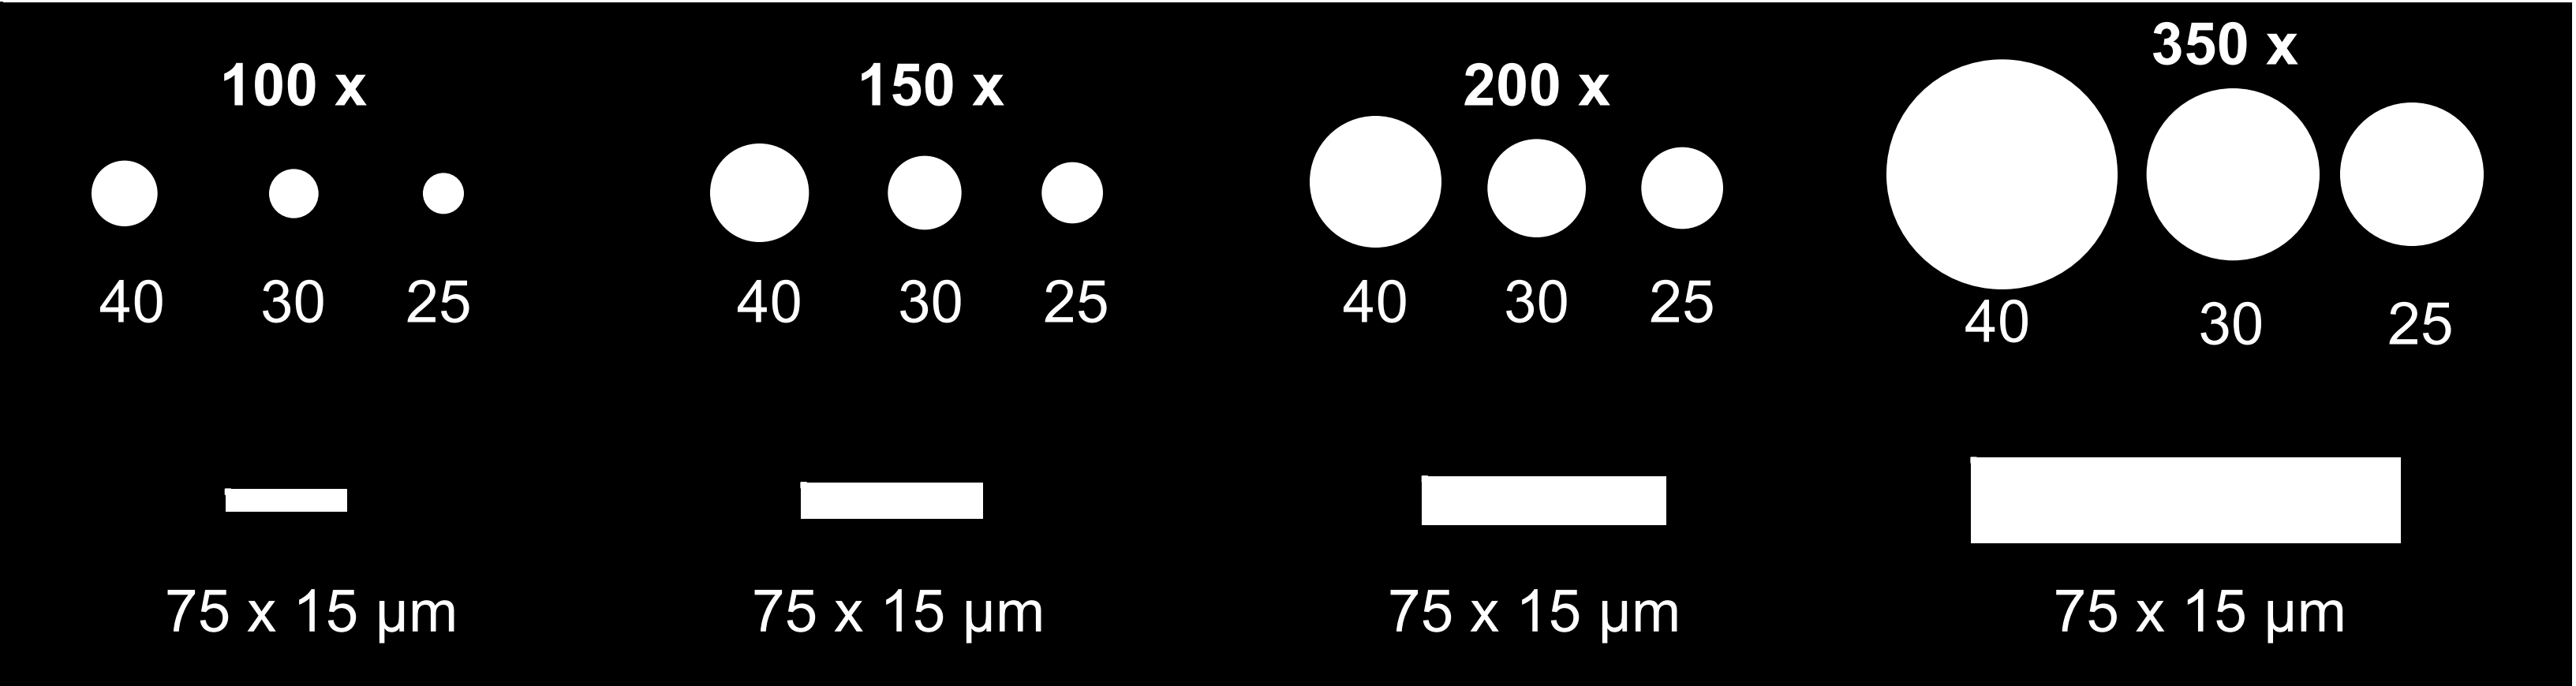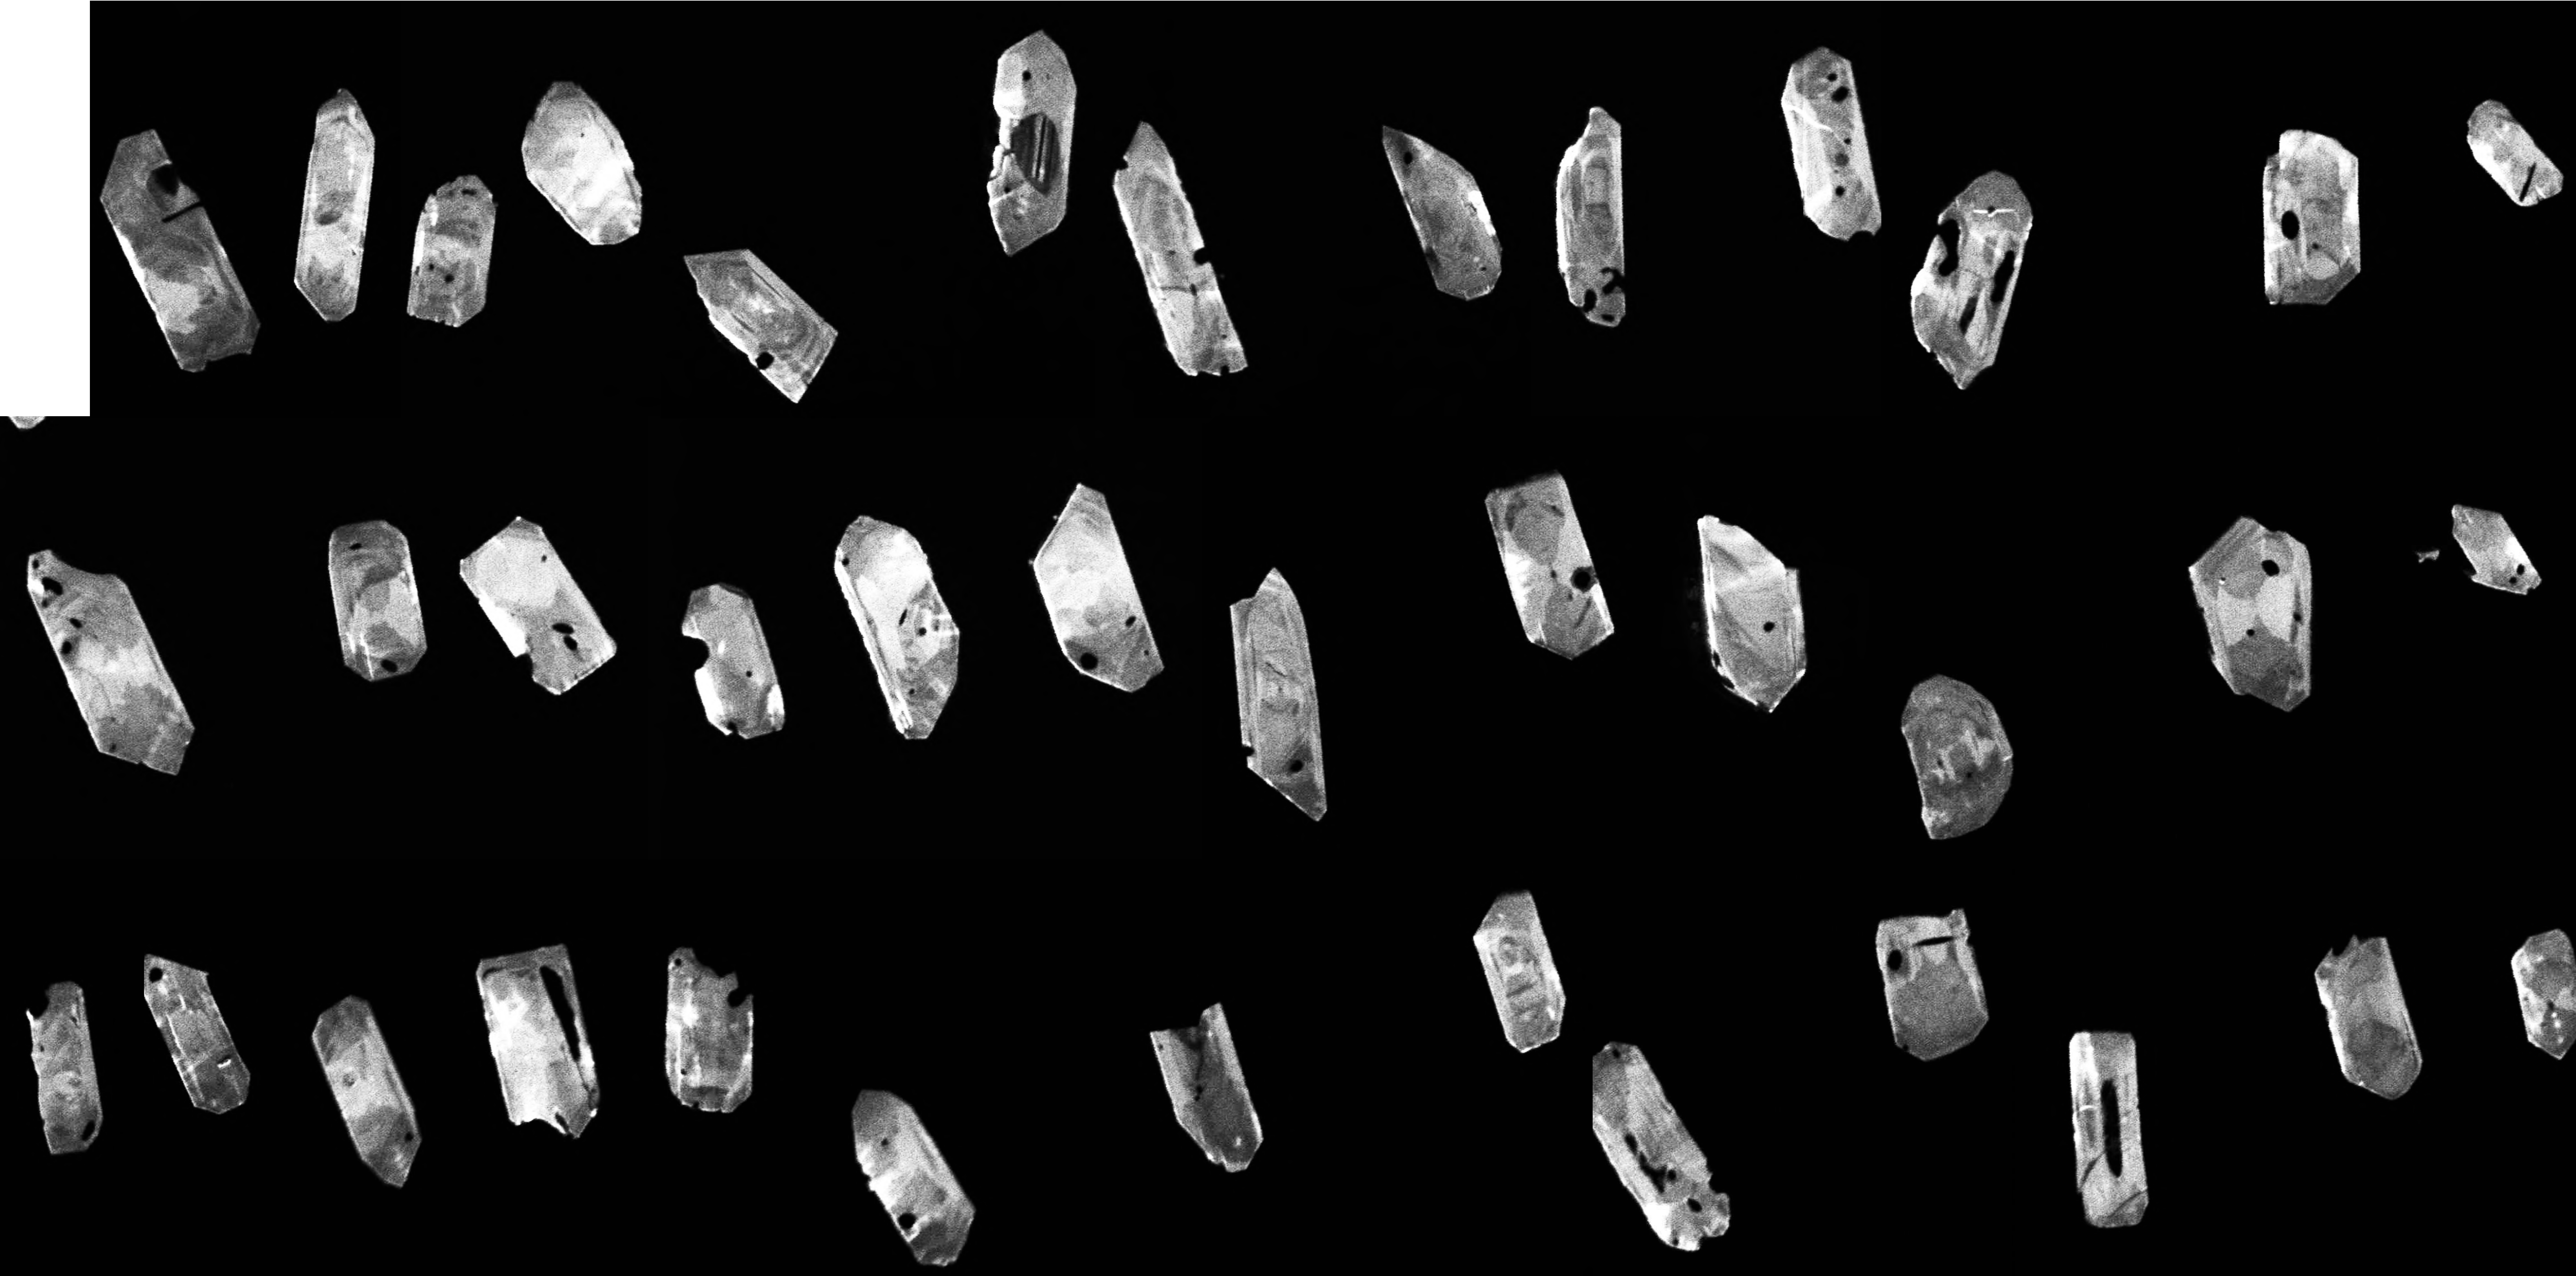



AE-389 (row 5) 200x

Feb.08/17

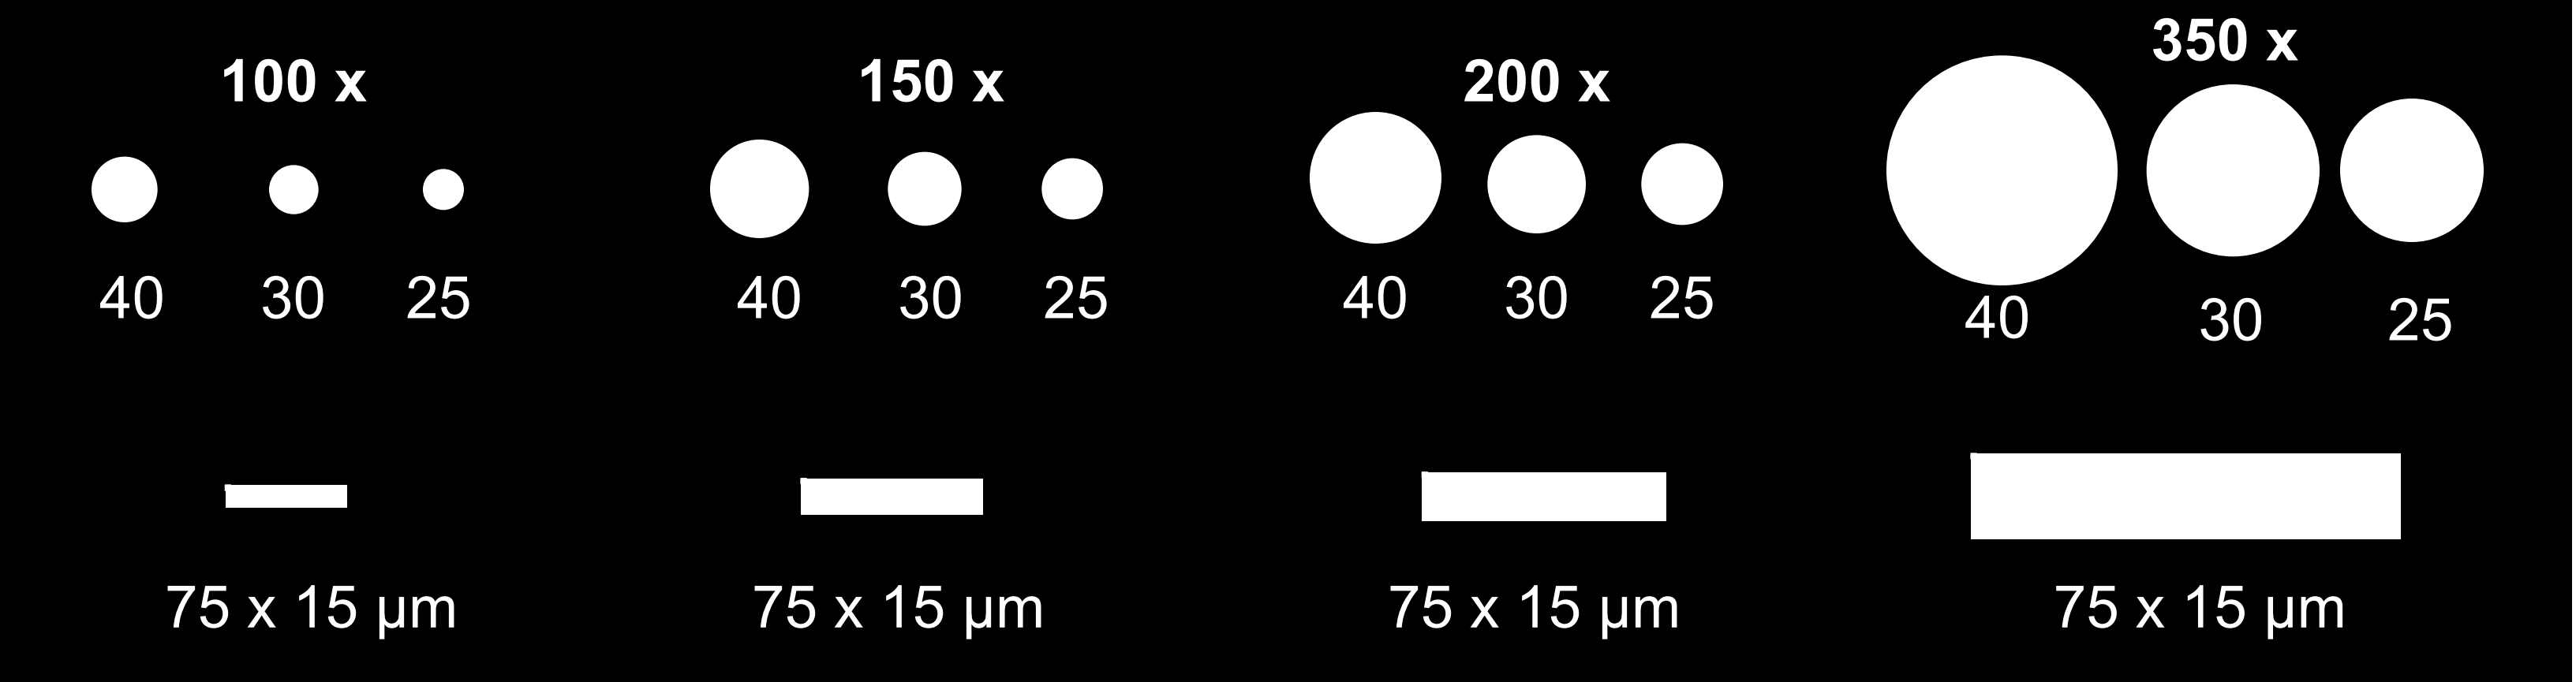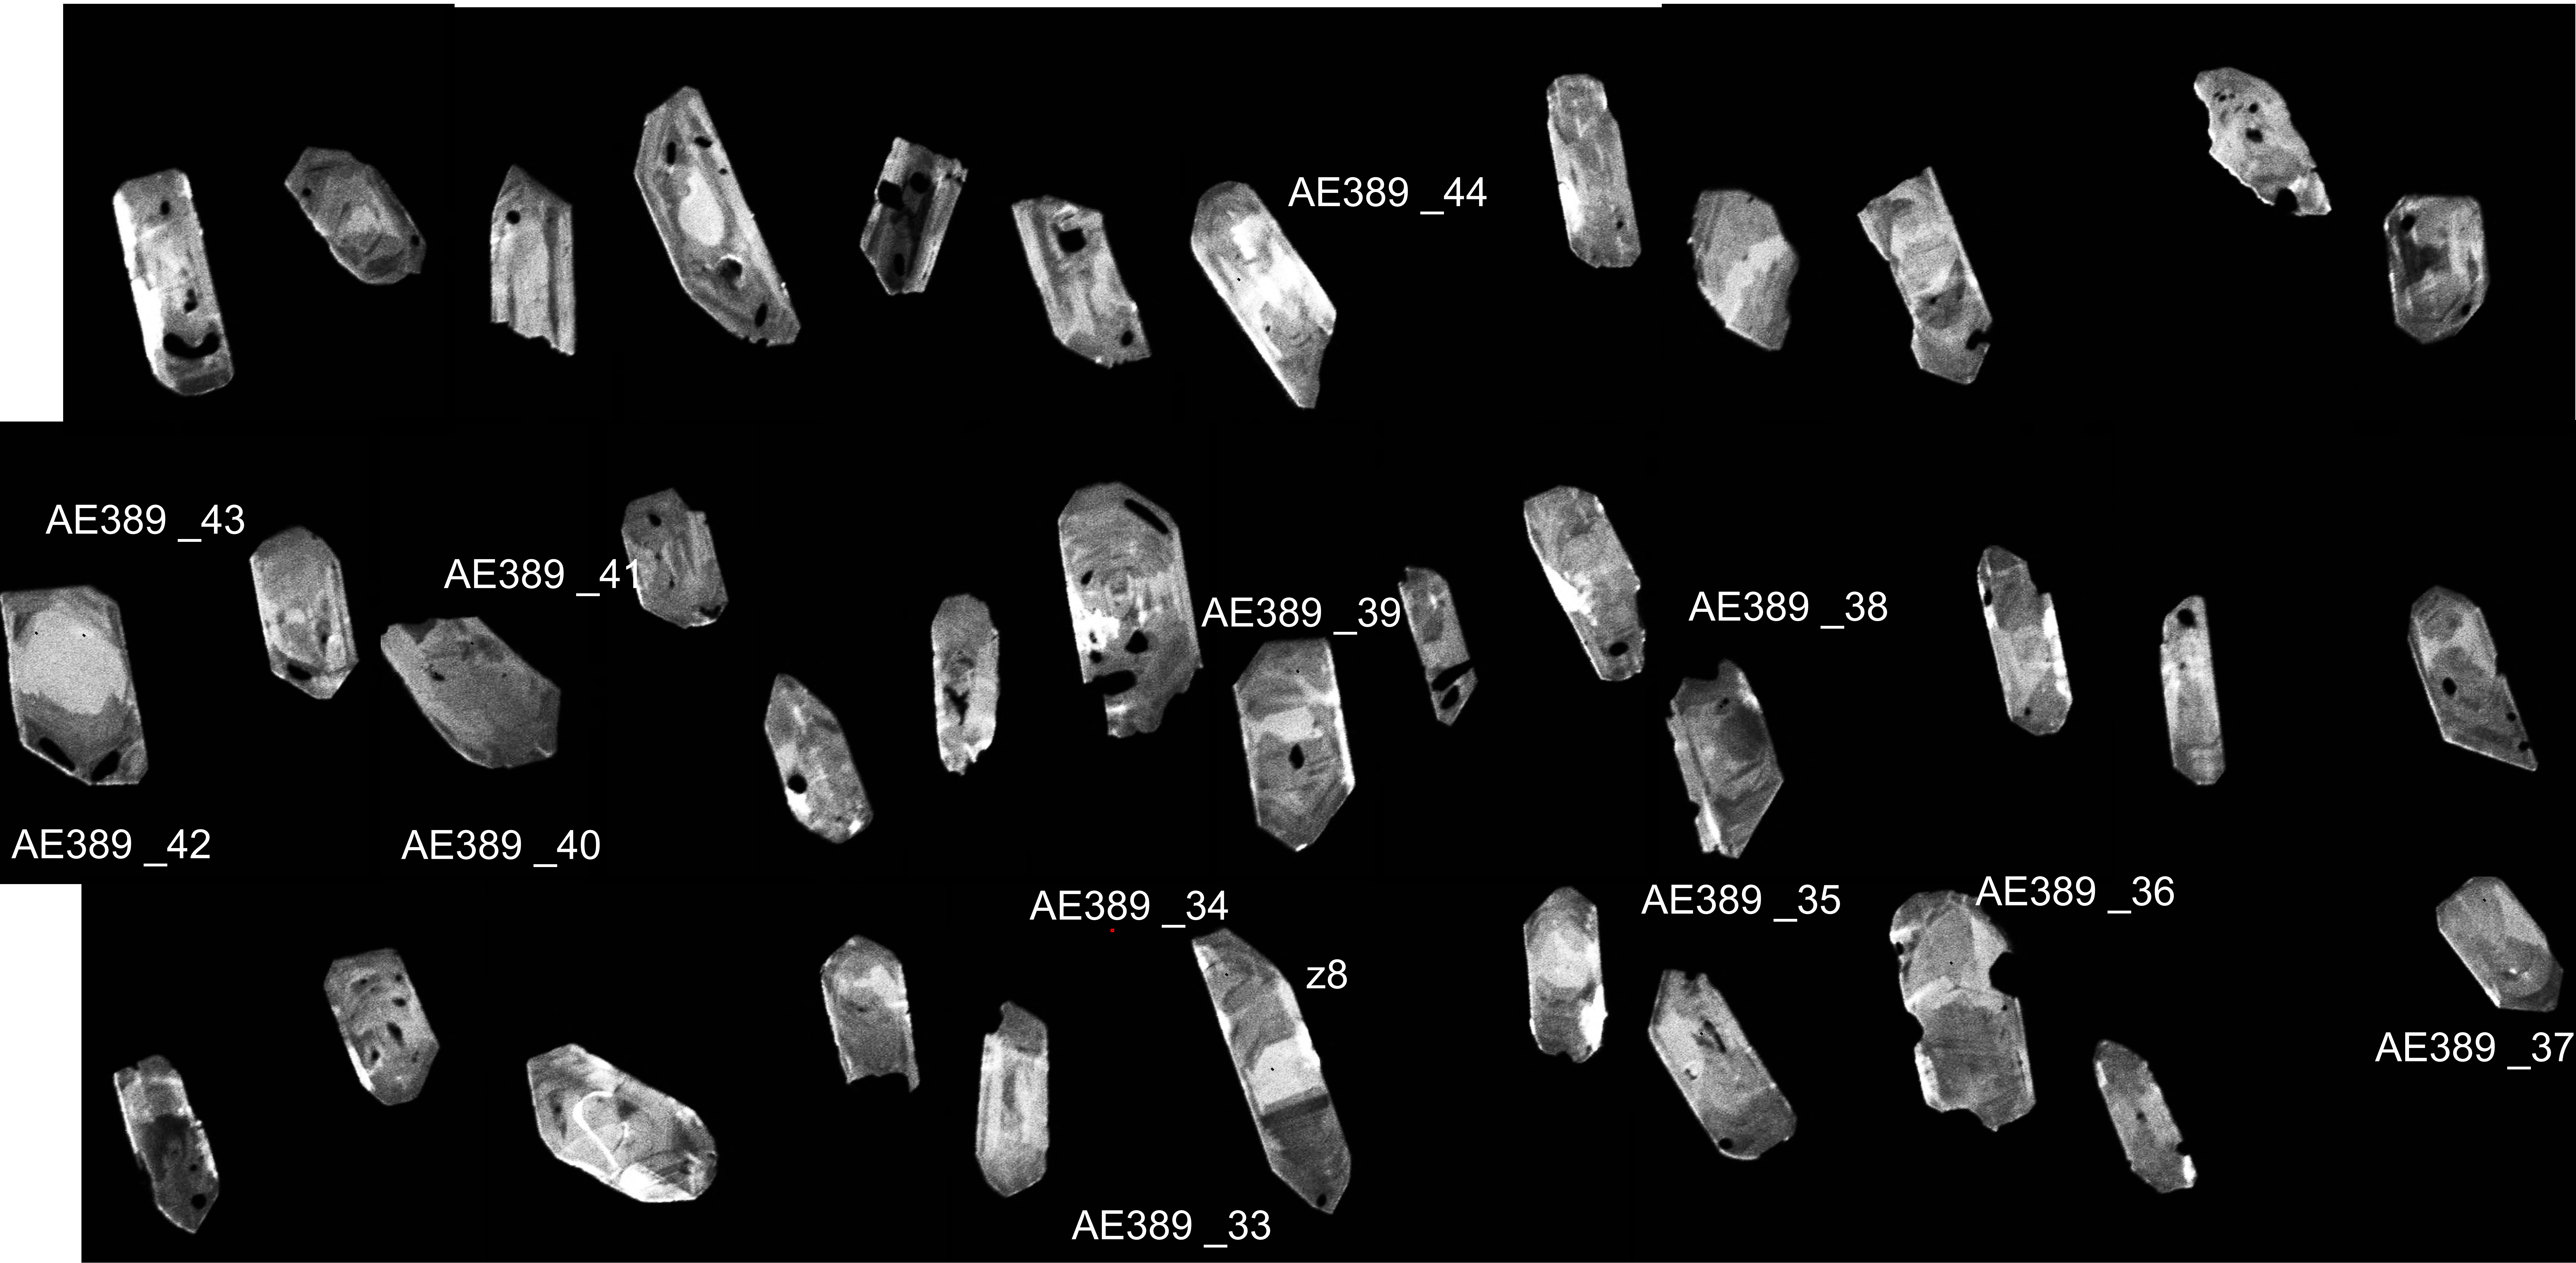



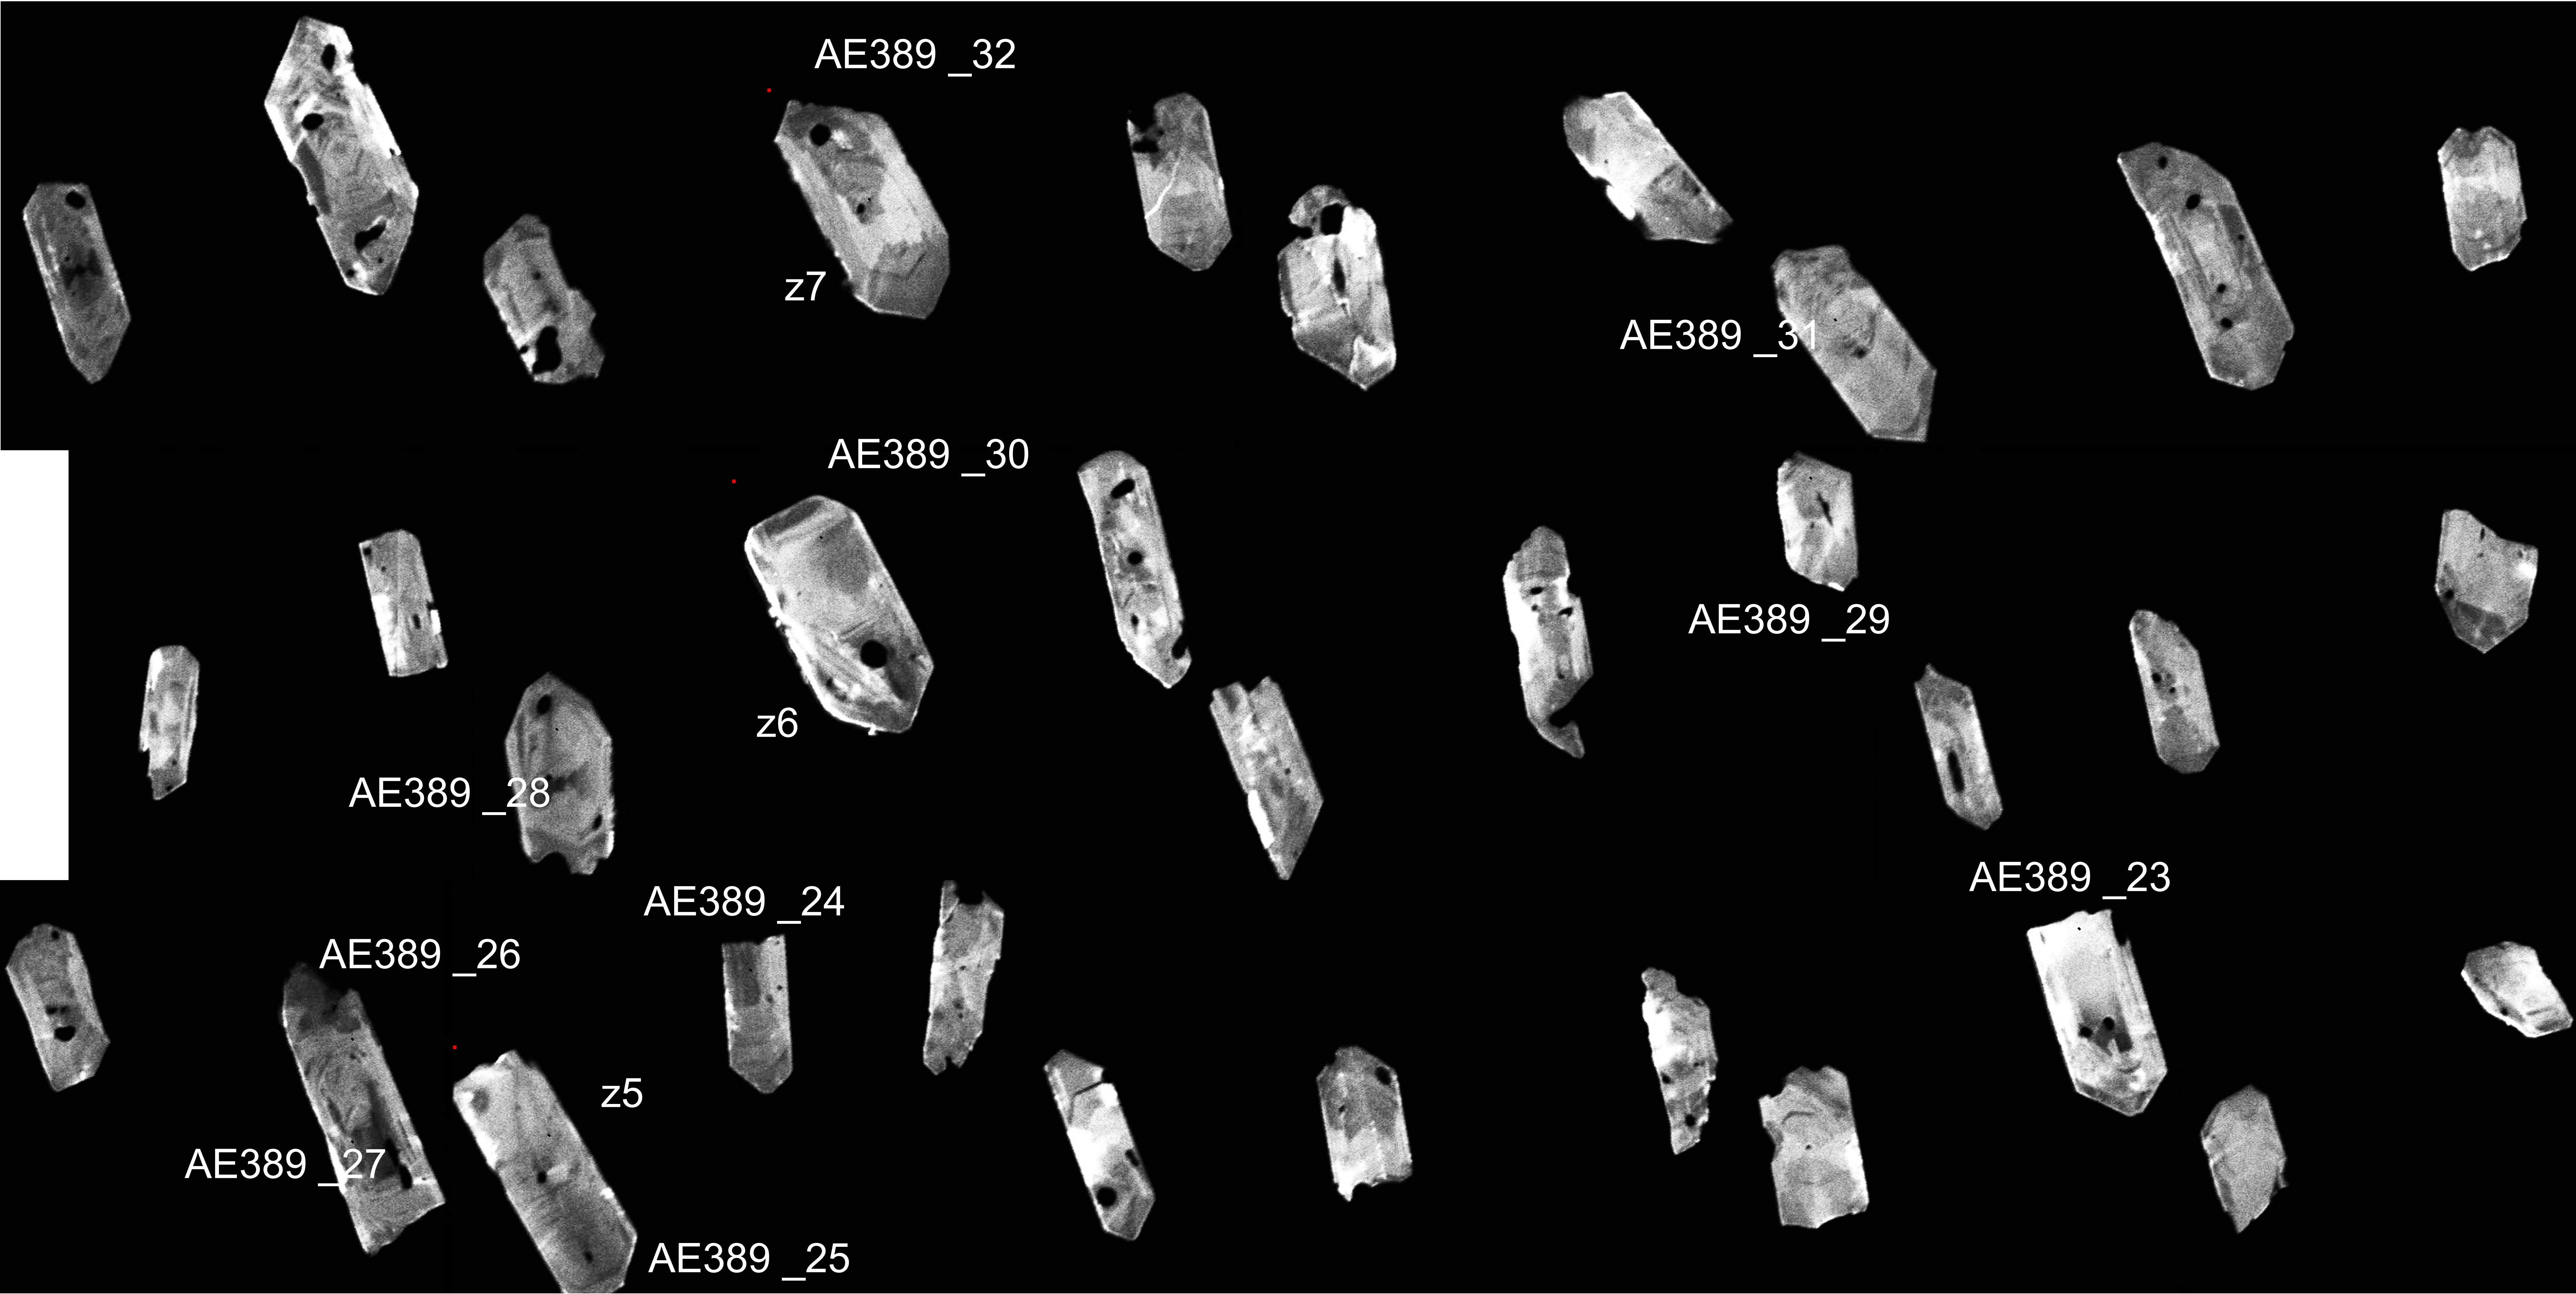



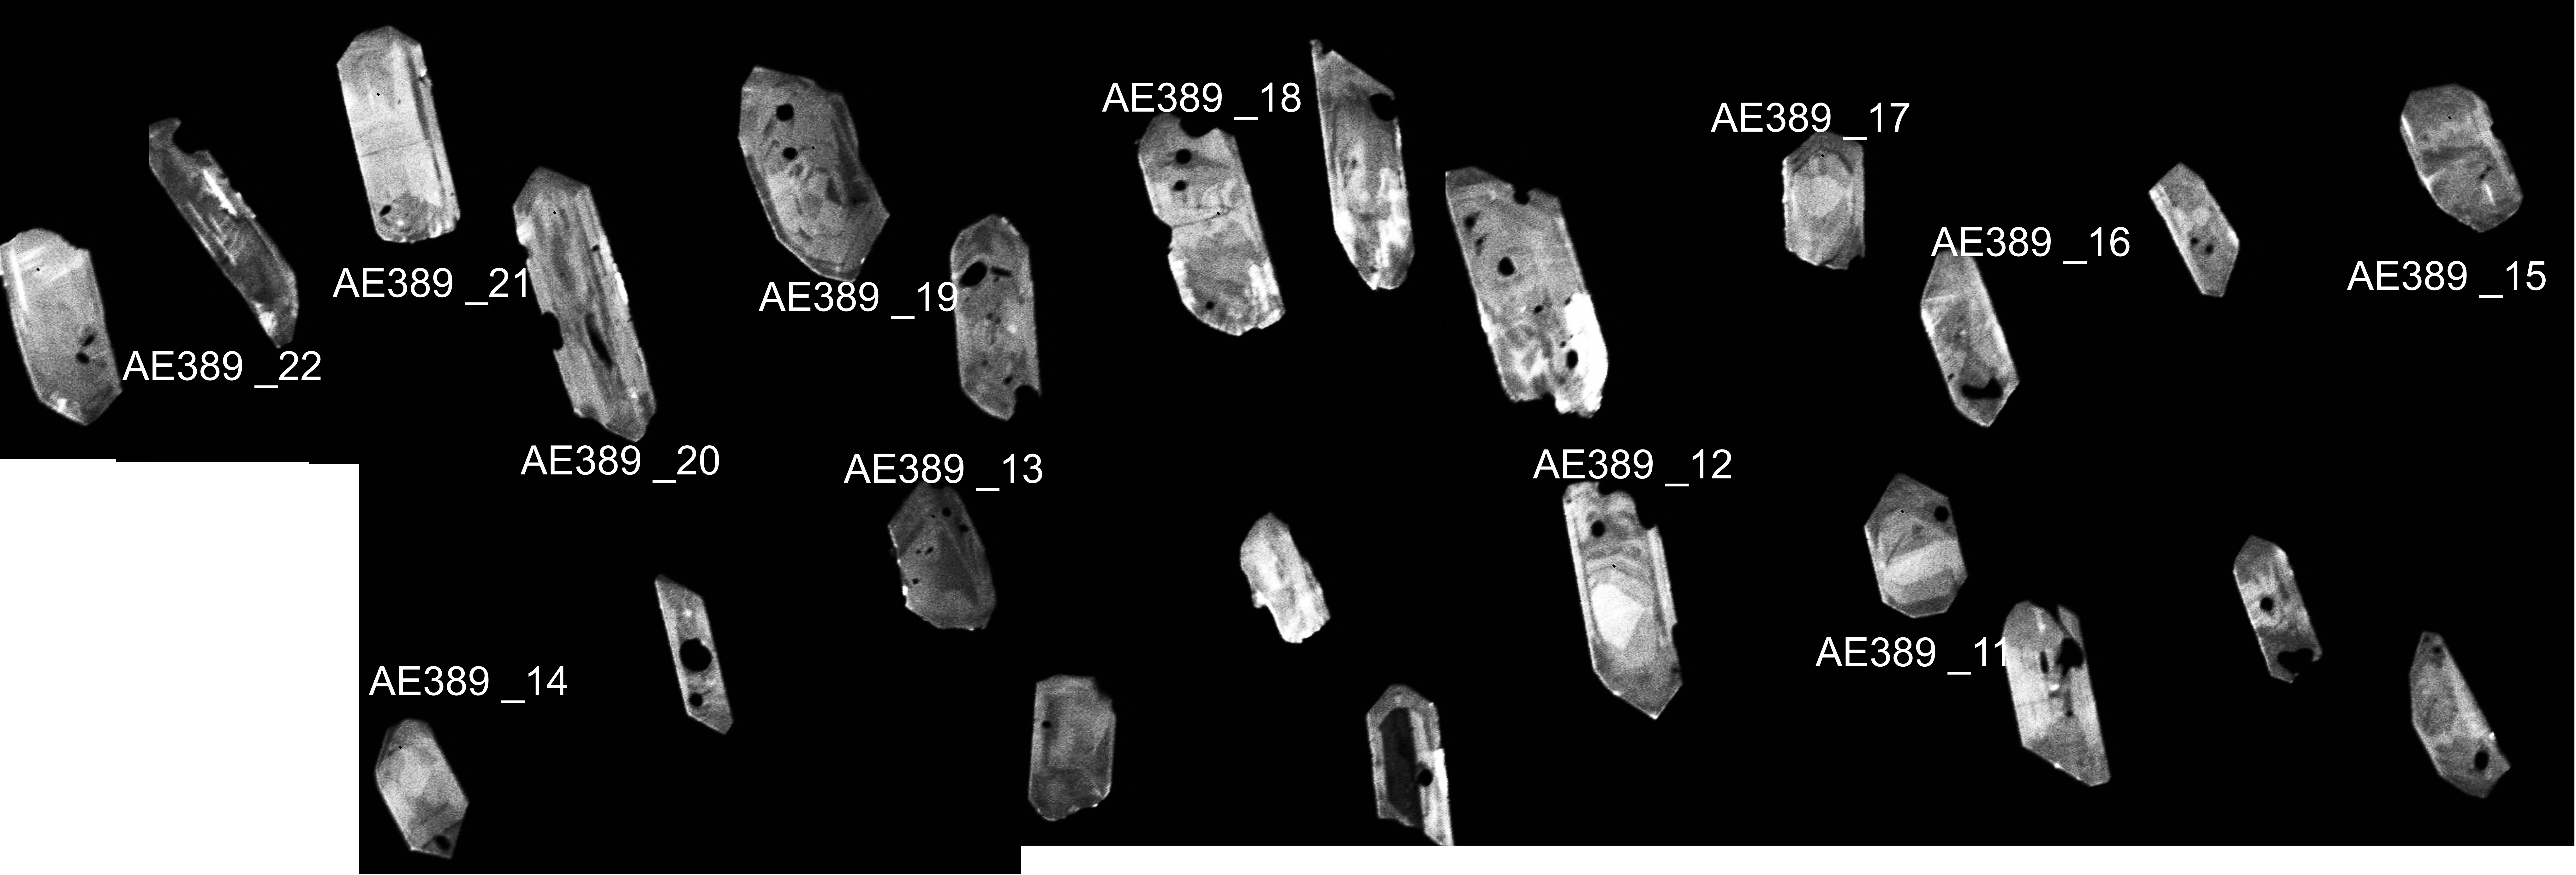



AE-389 (row 8) 200x

Feb.08/17

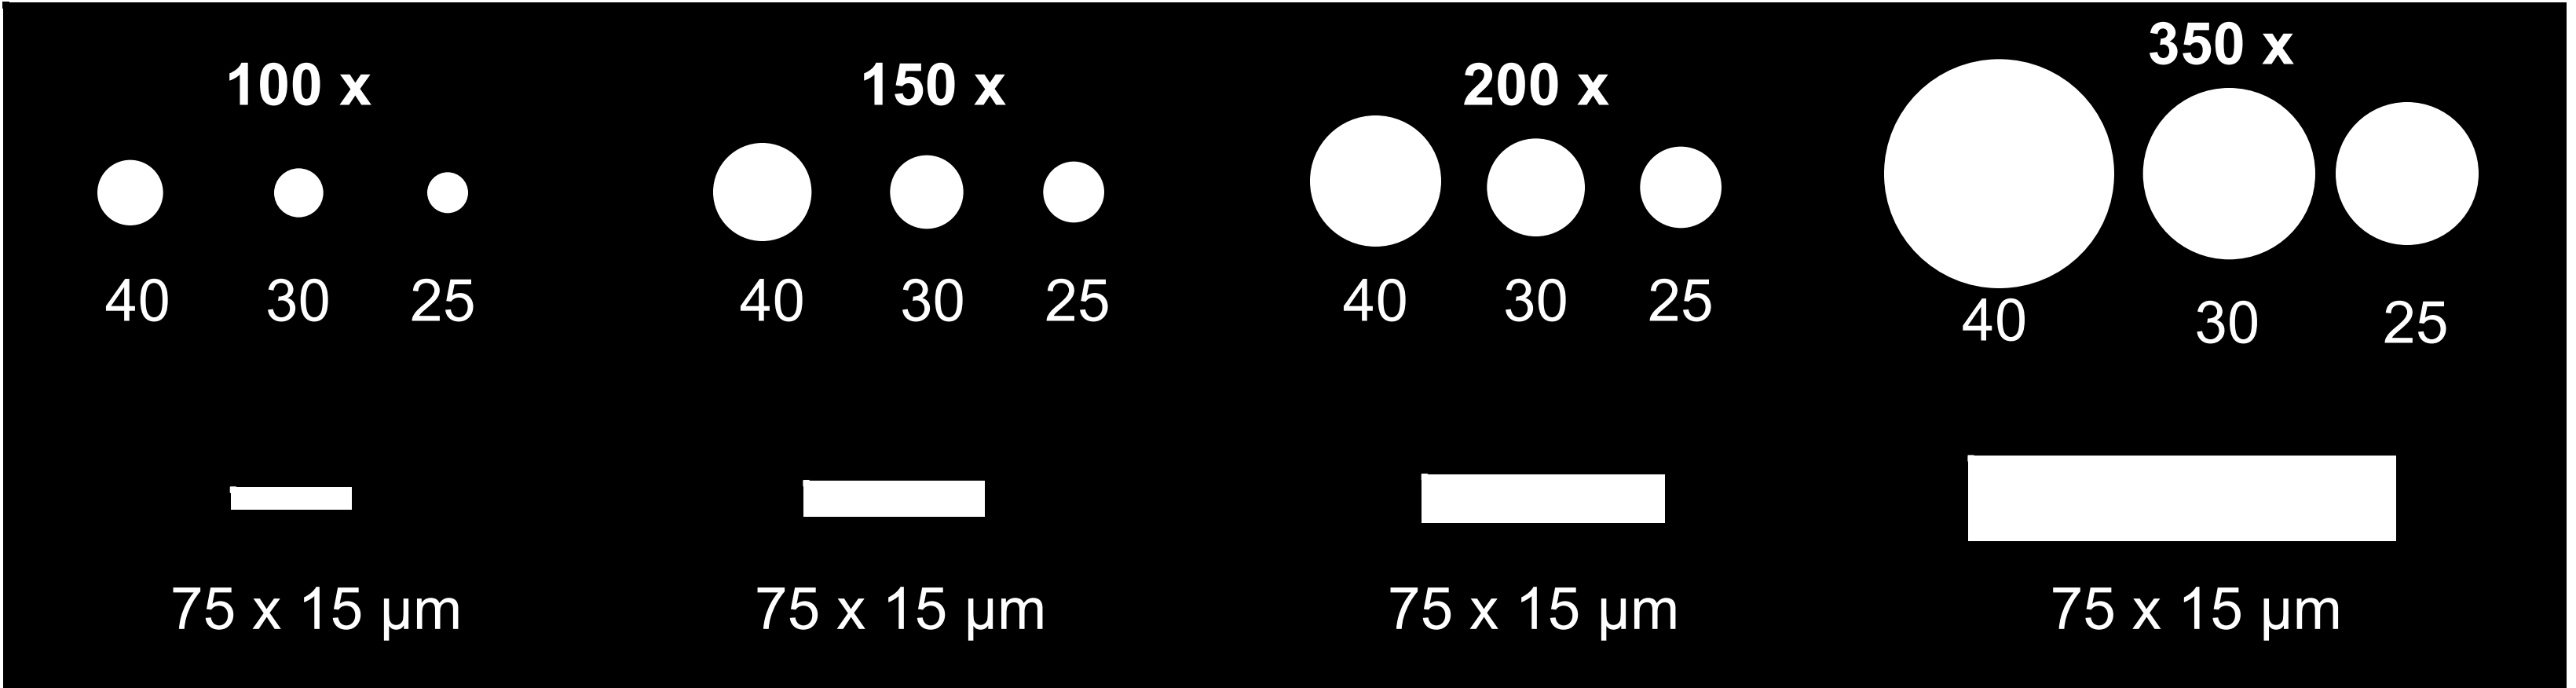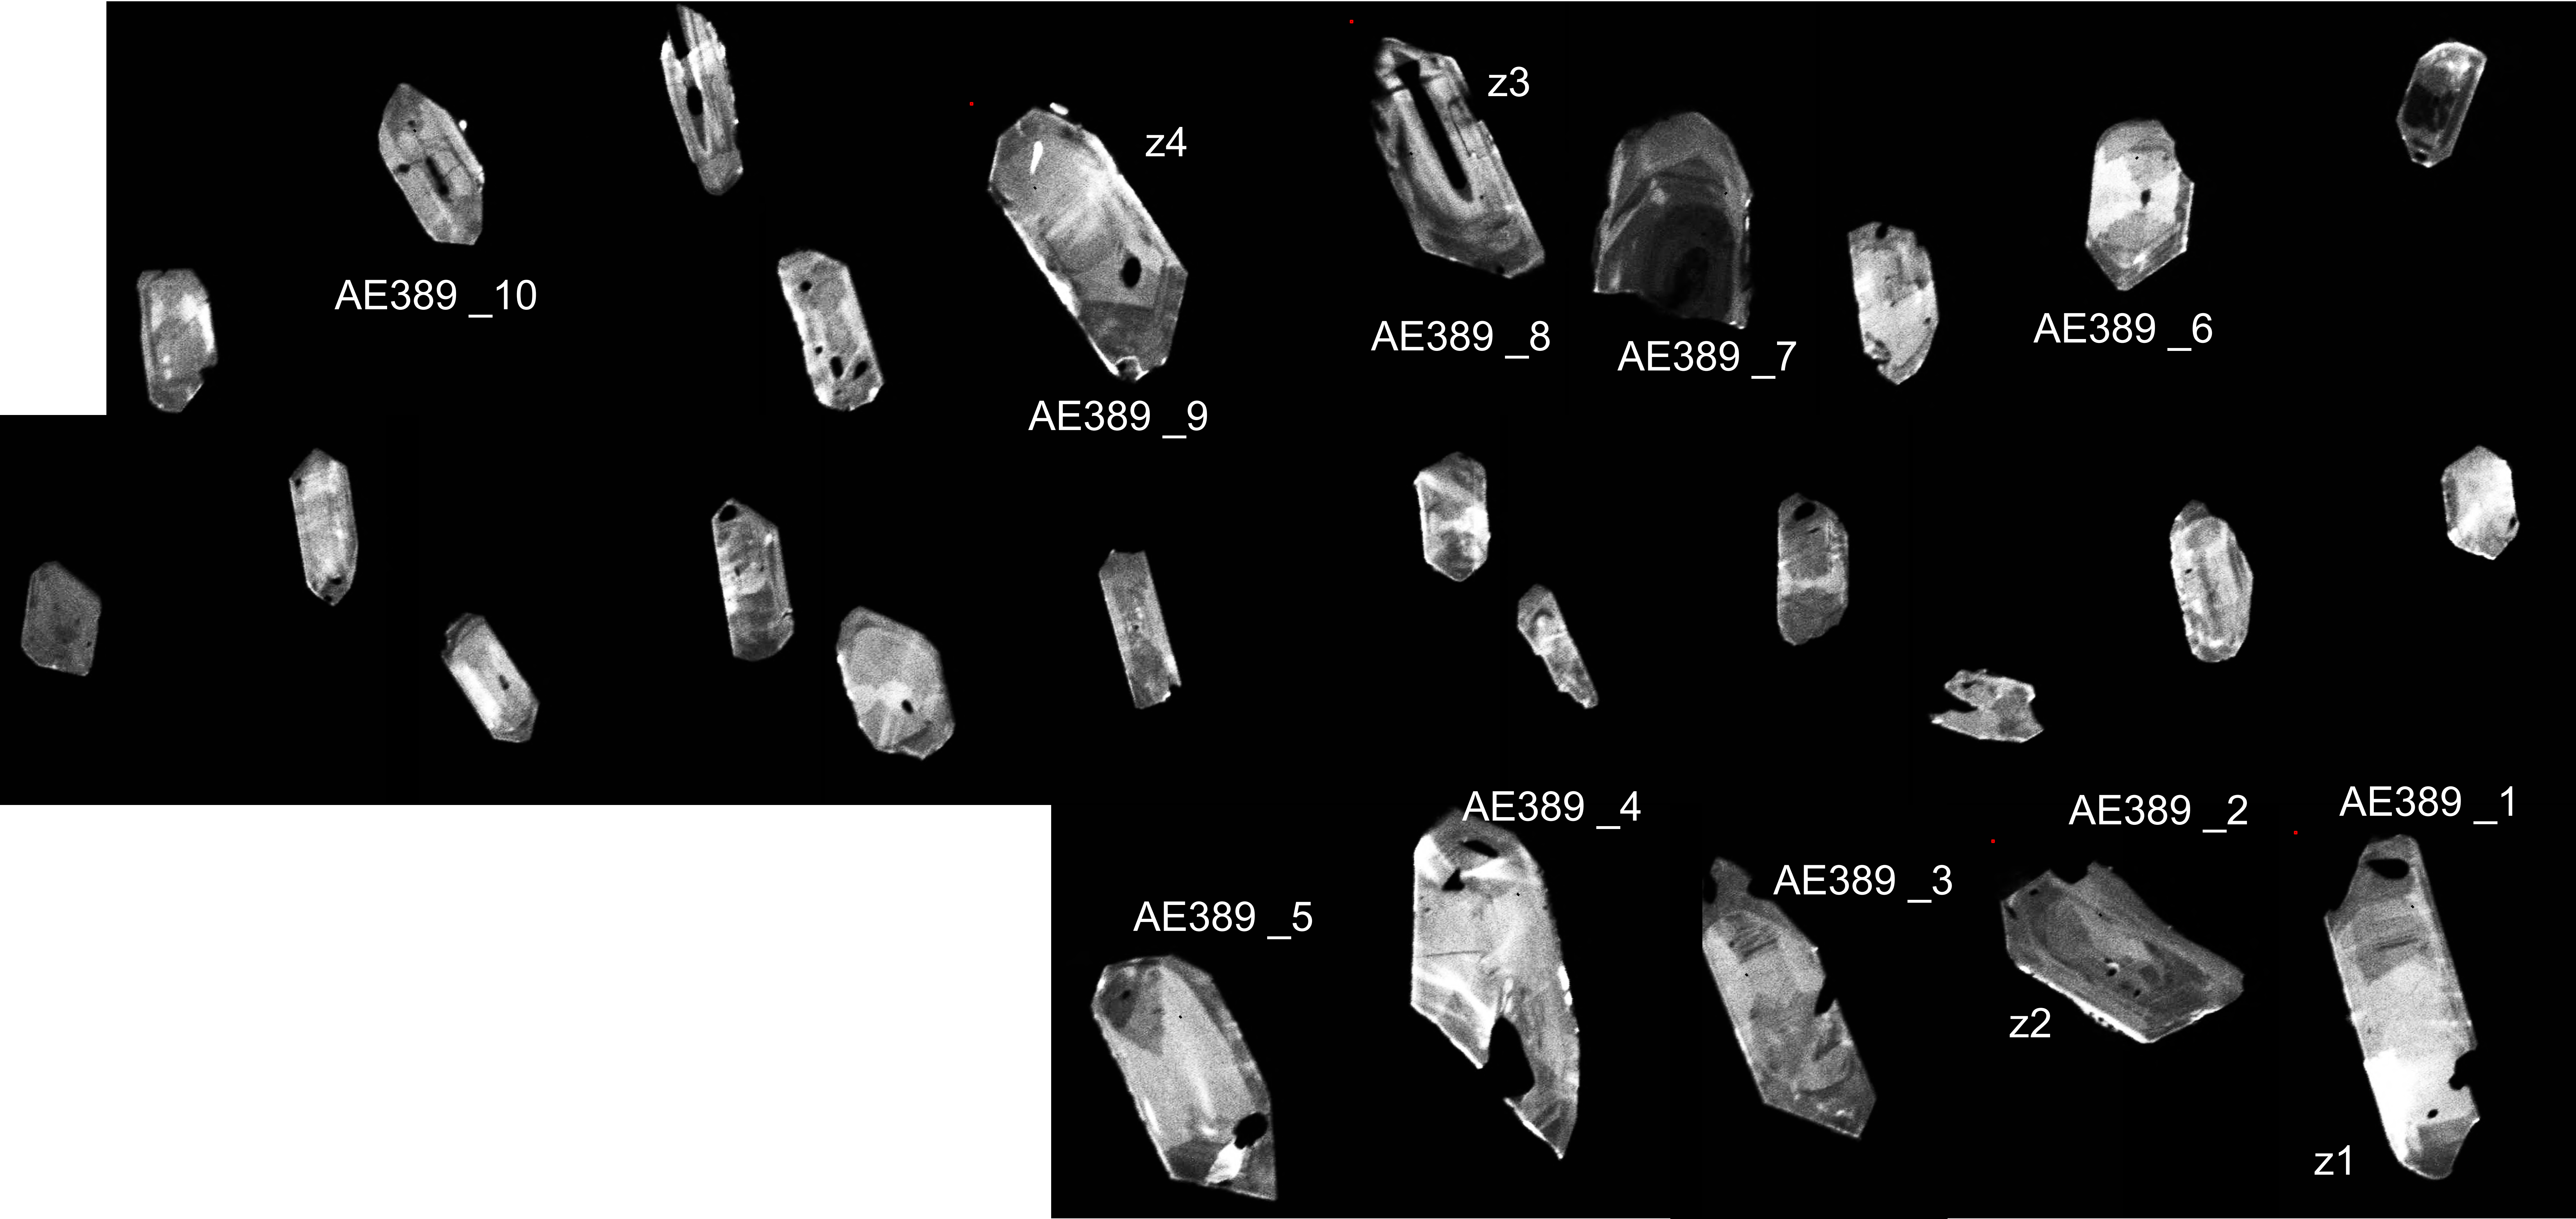



JP-118

100x

Nov.21/2019

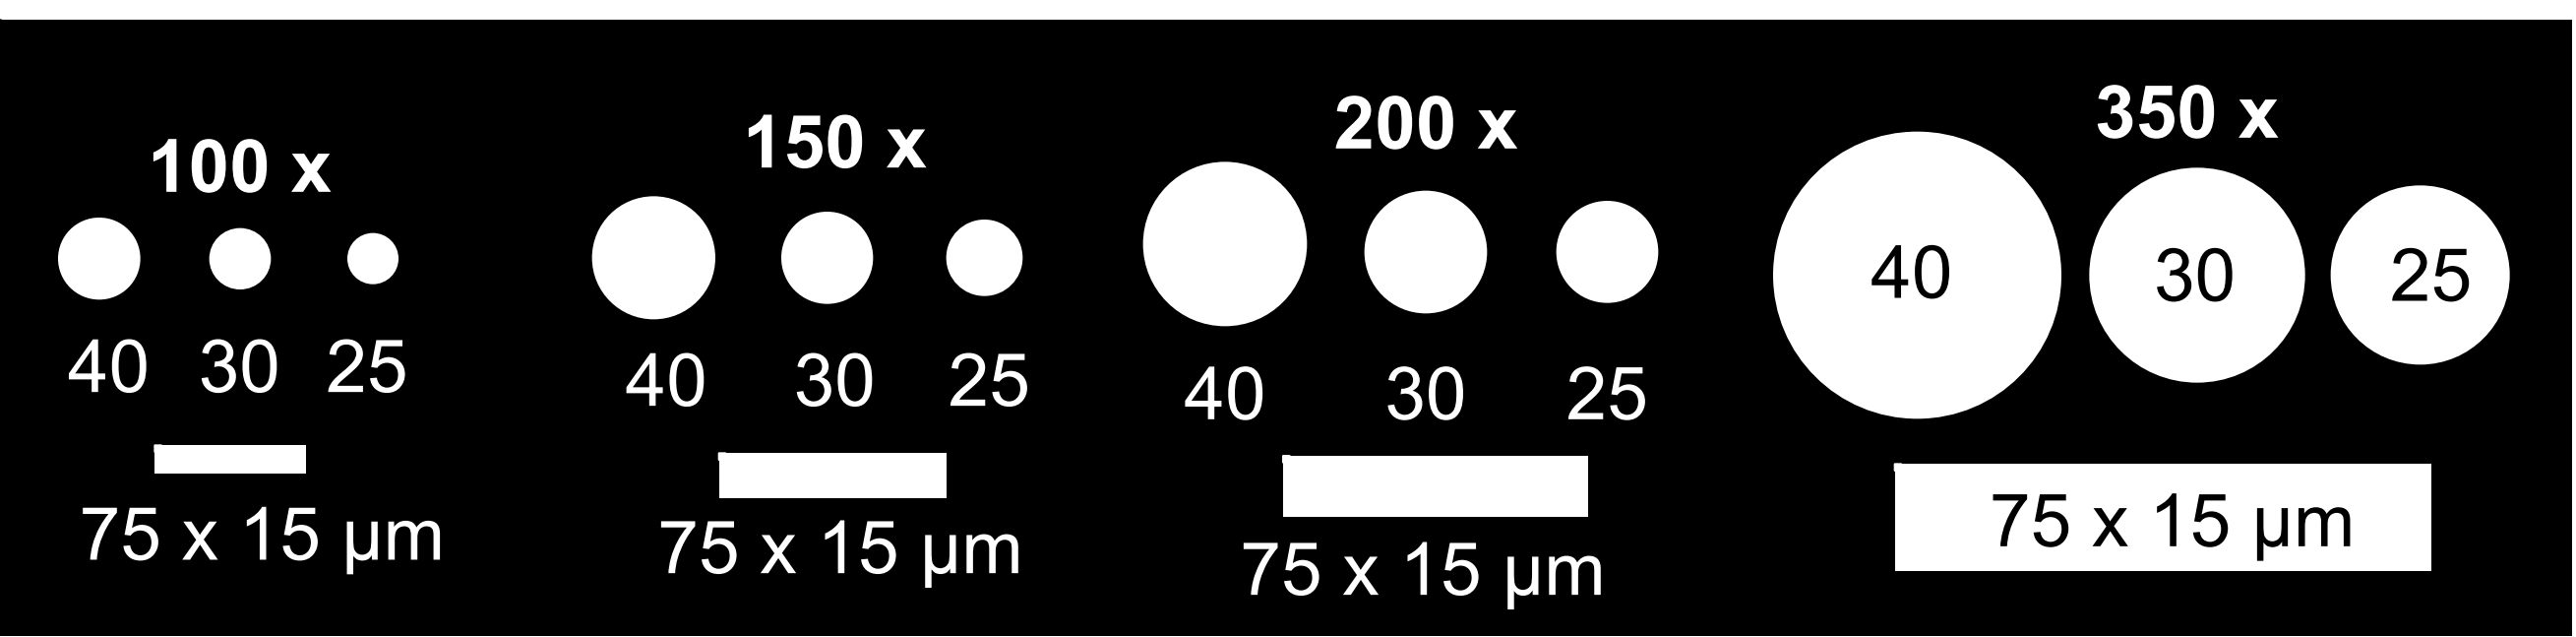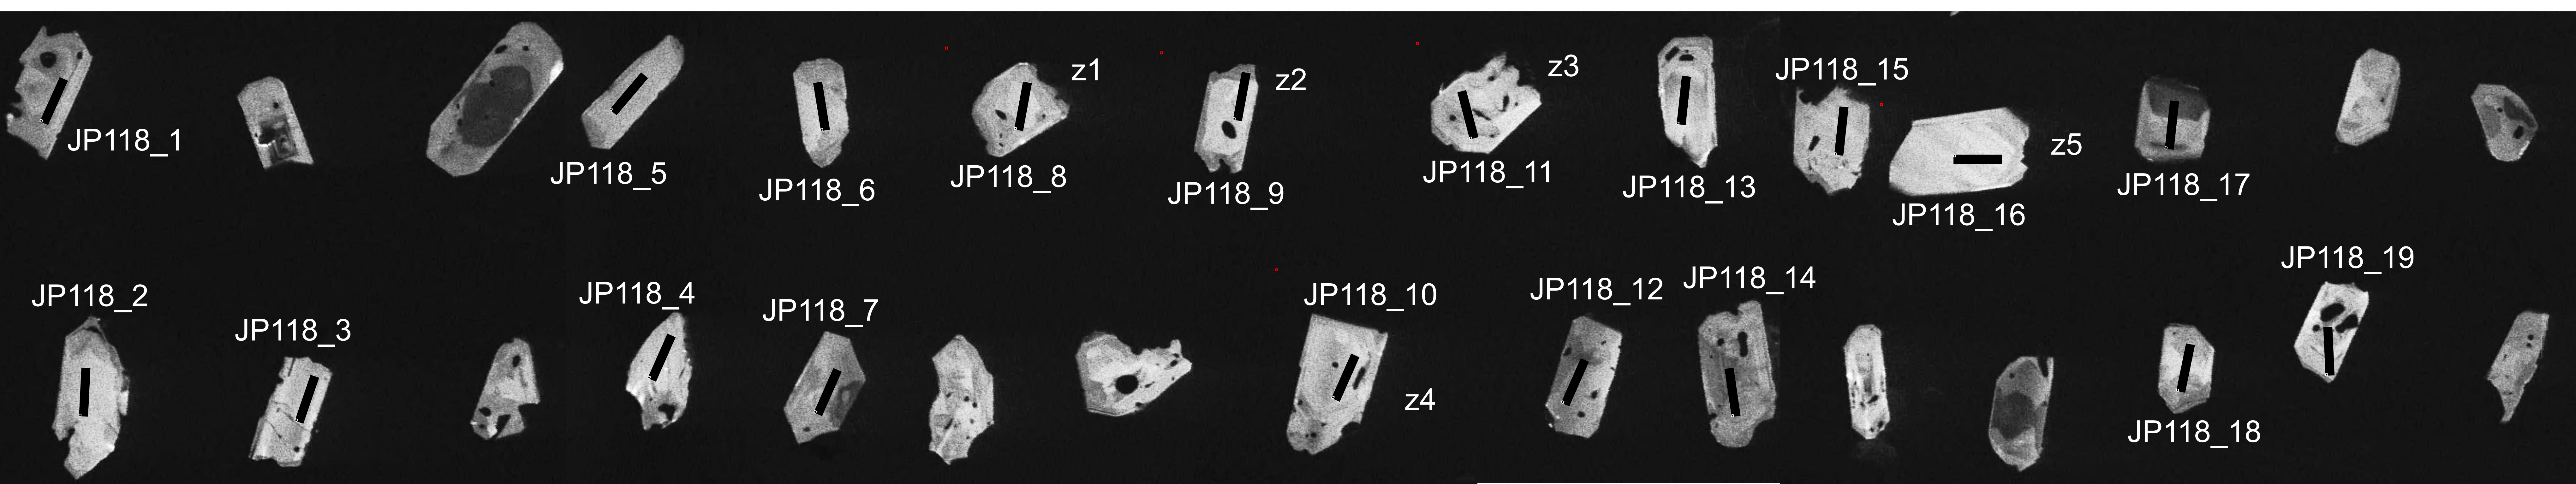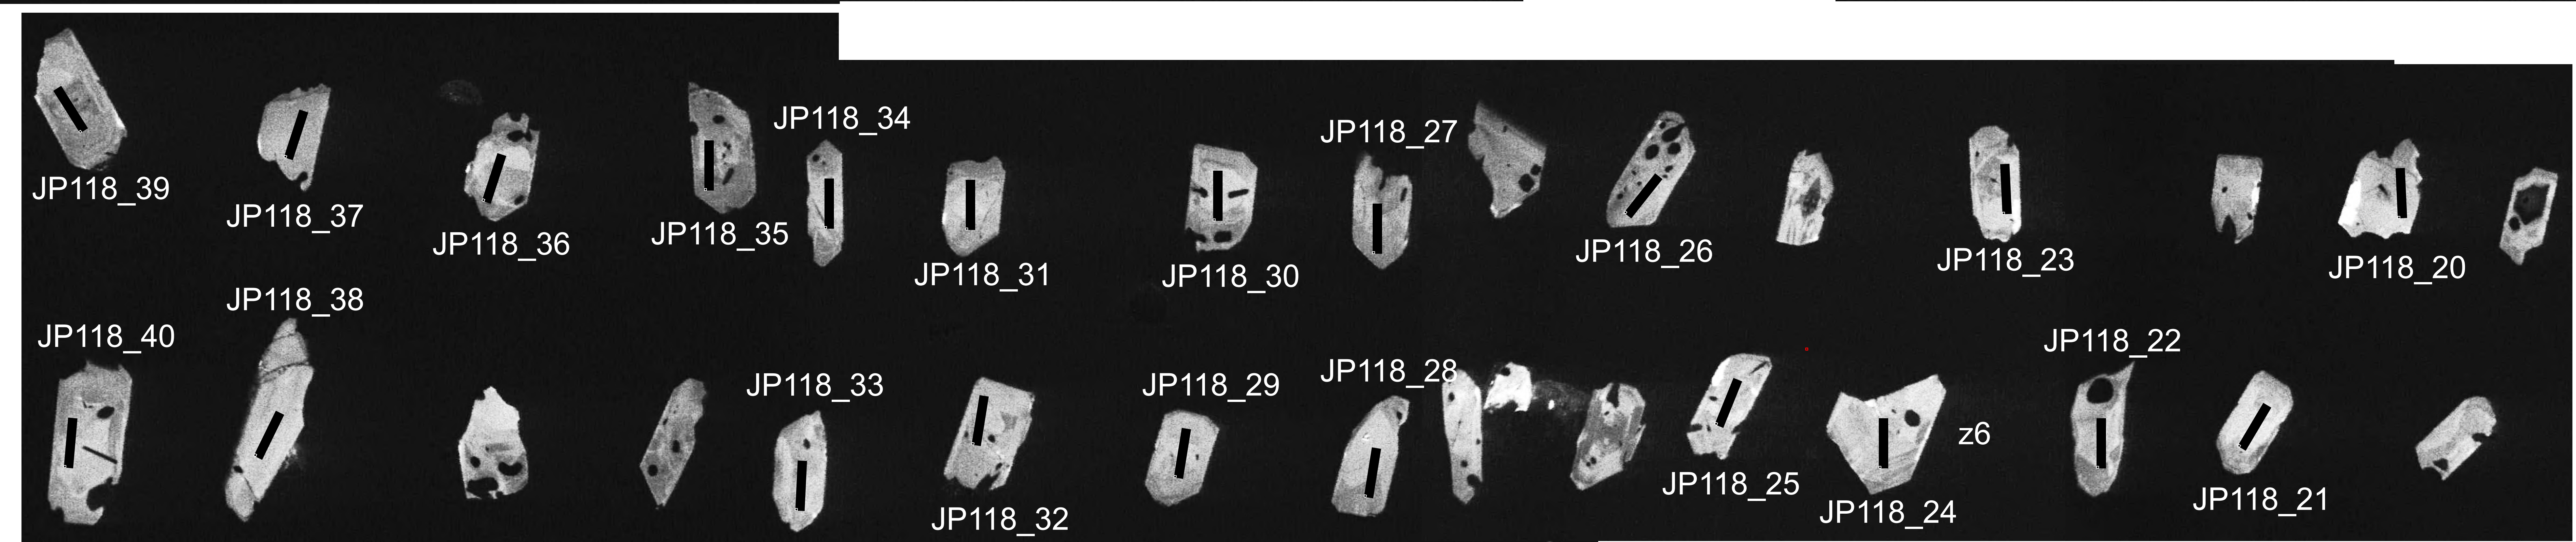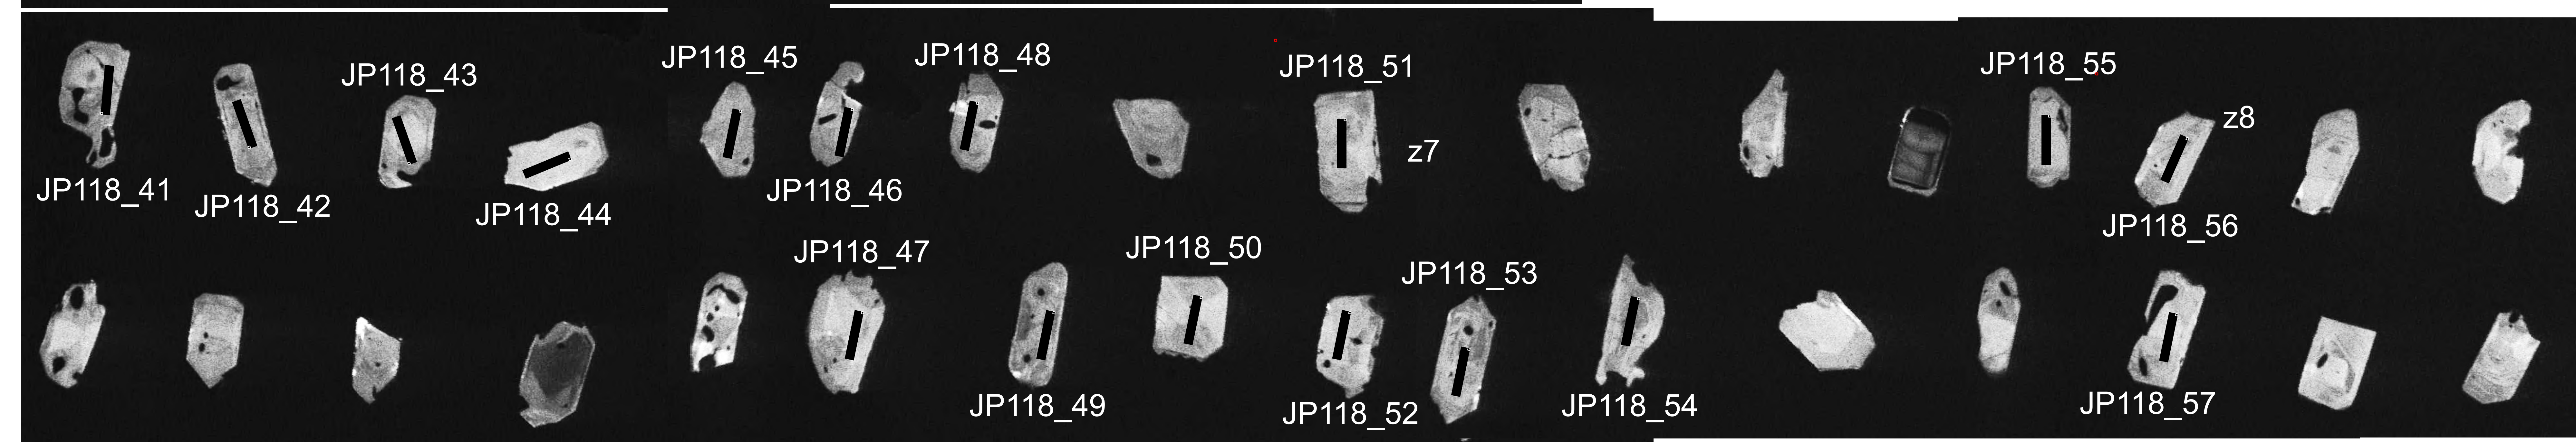



G-8 (row 1)

200x

Feb.08/17

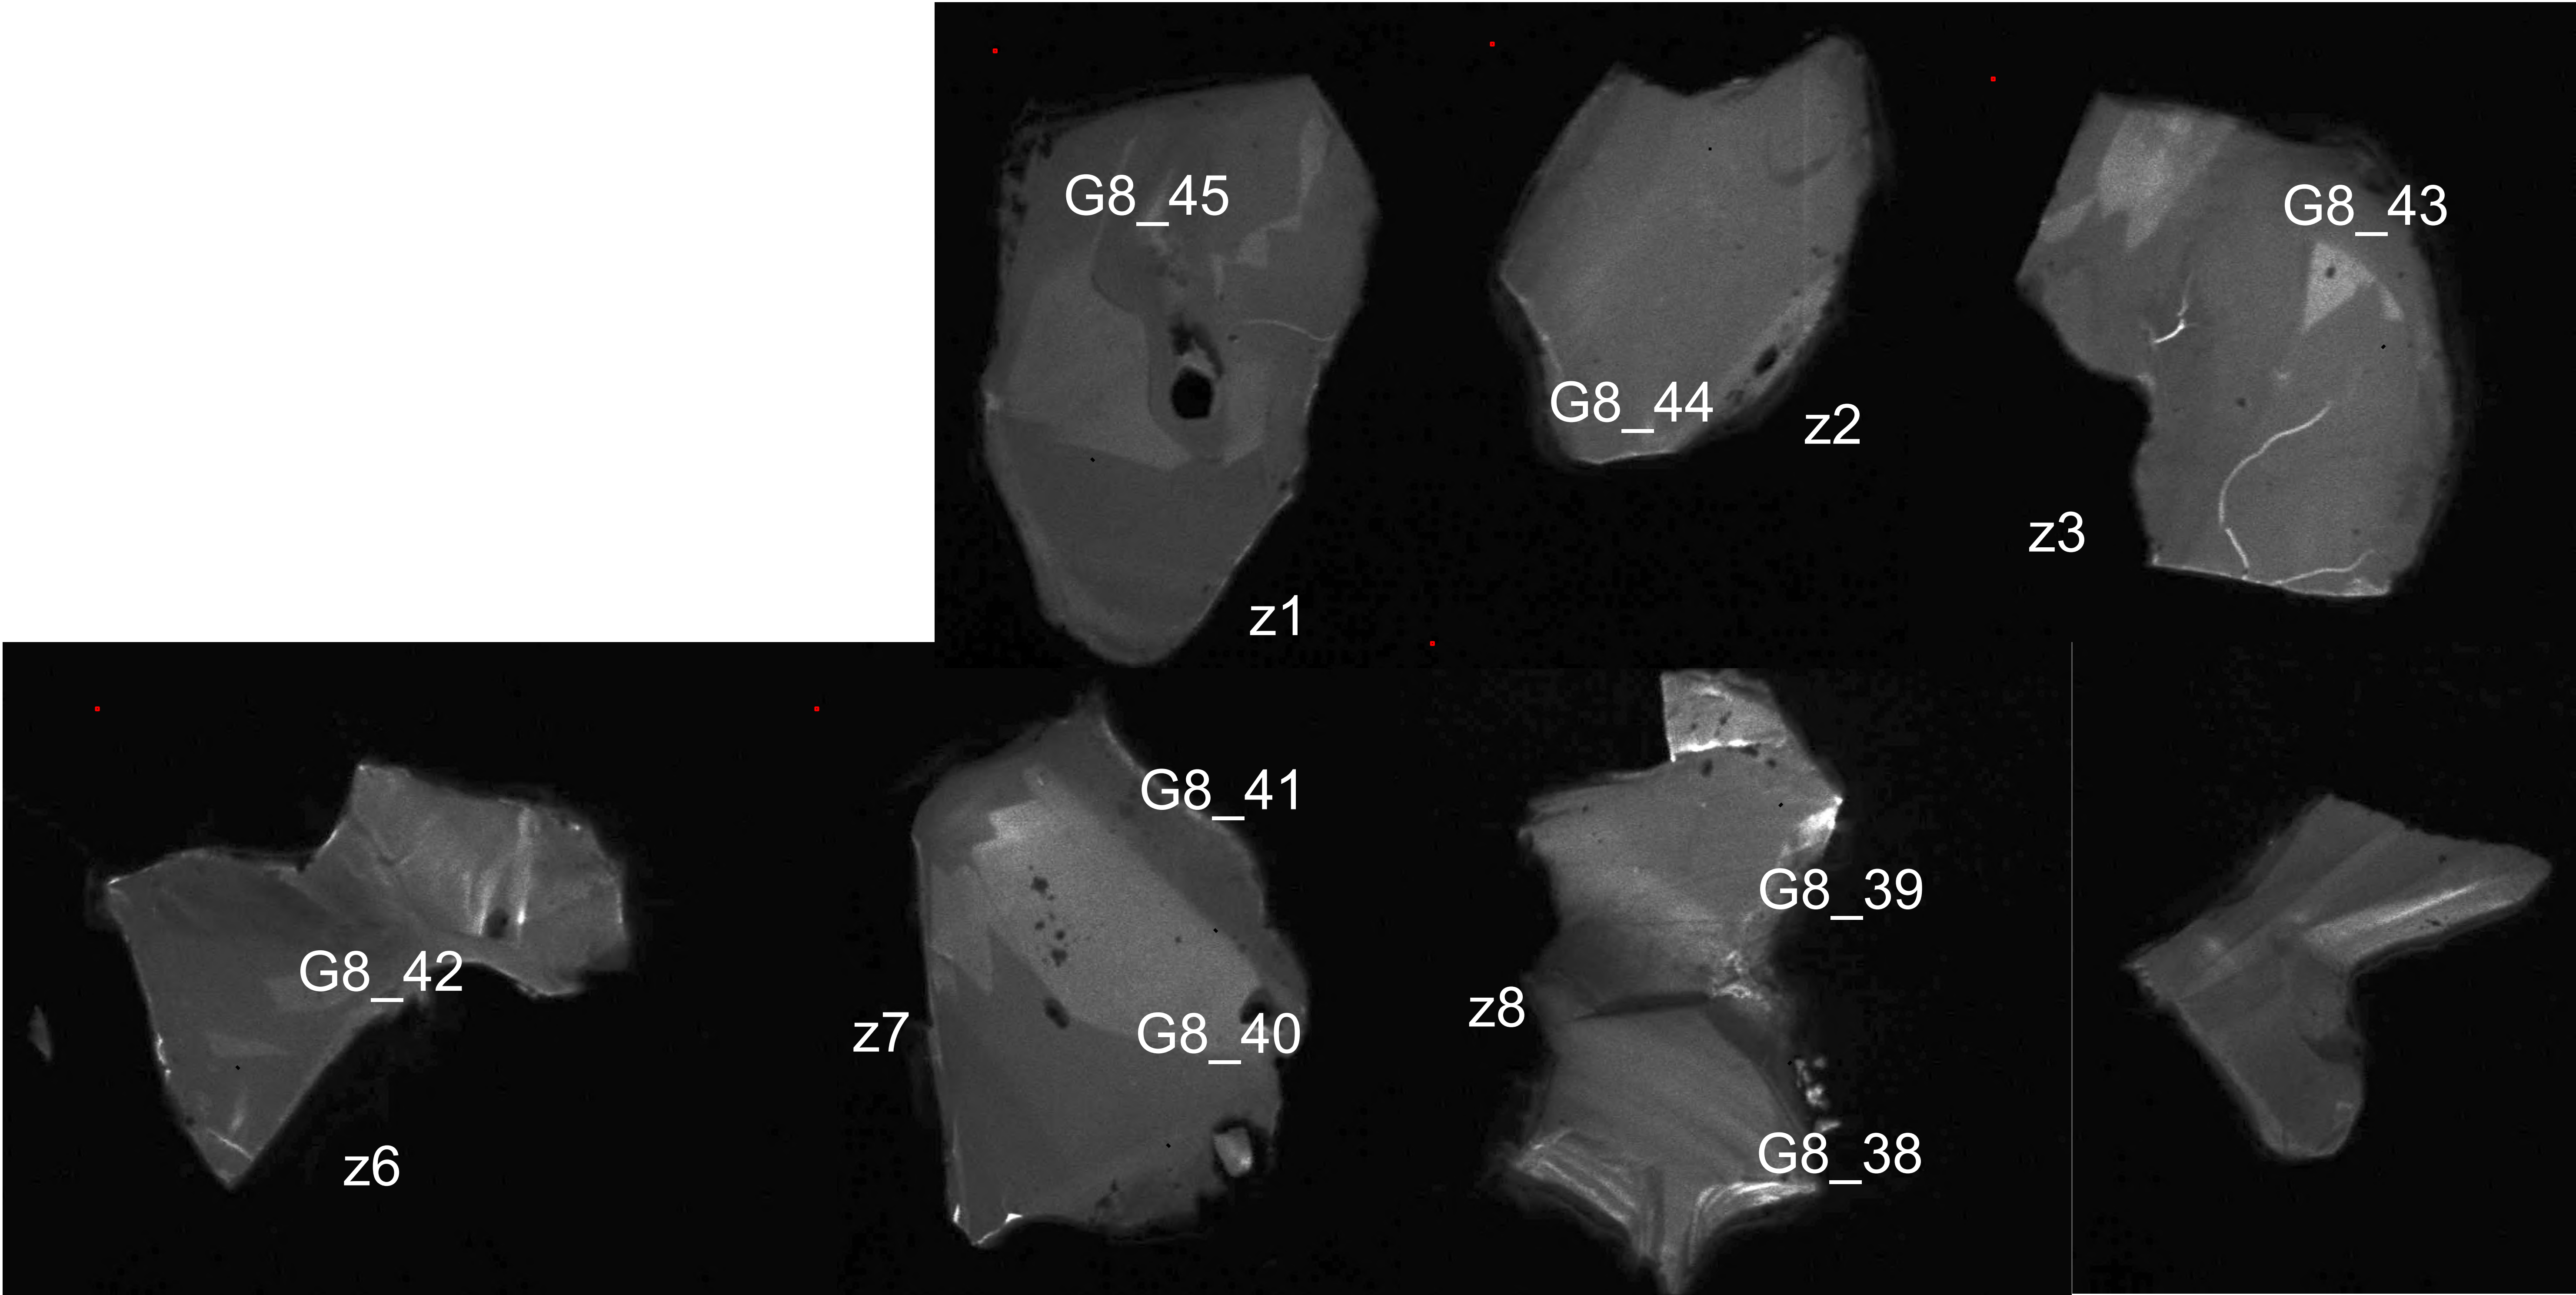



G-8 (row 2)

200x

Feb.08/17

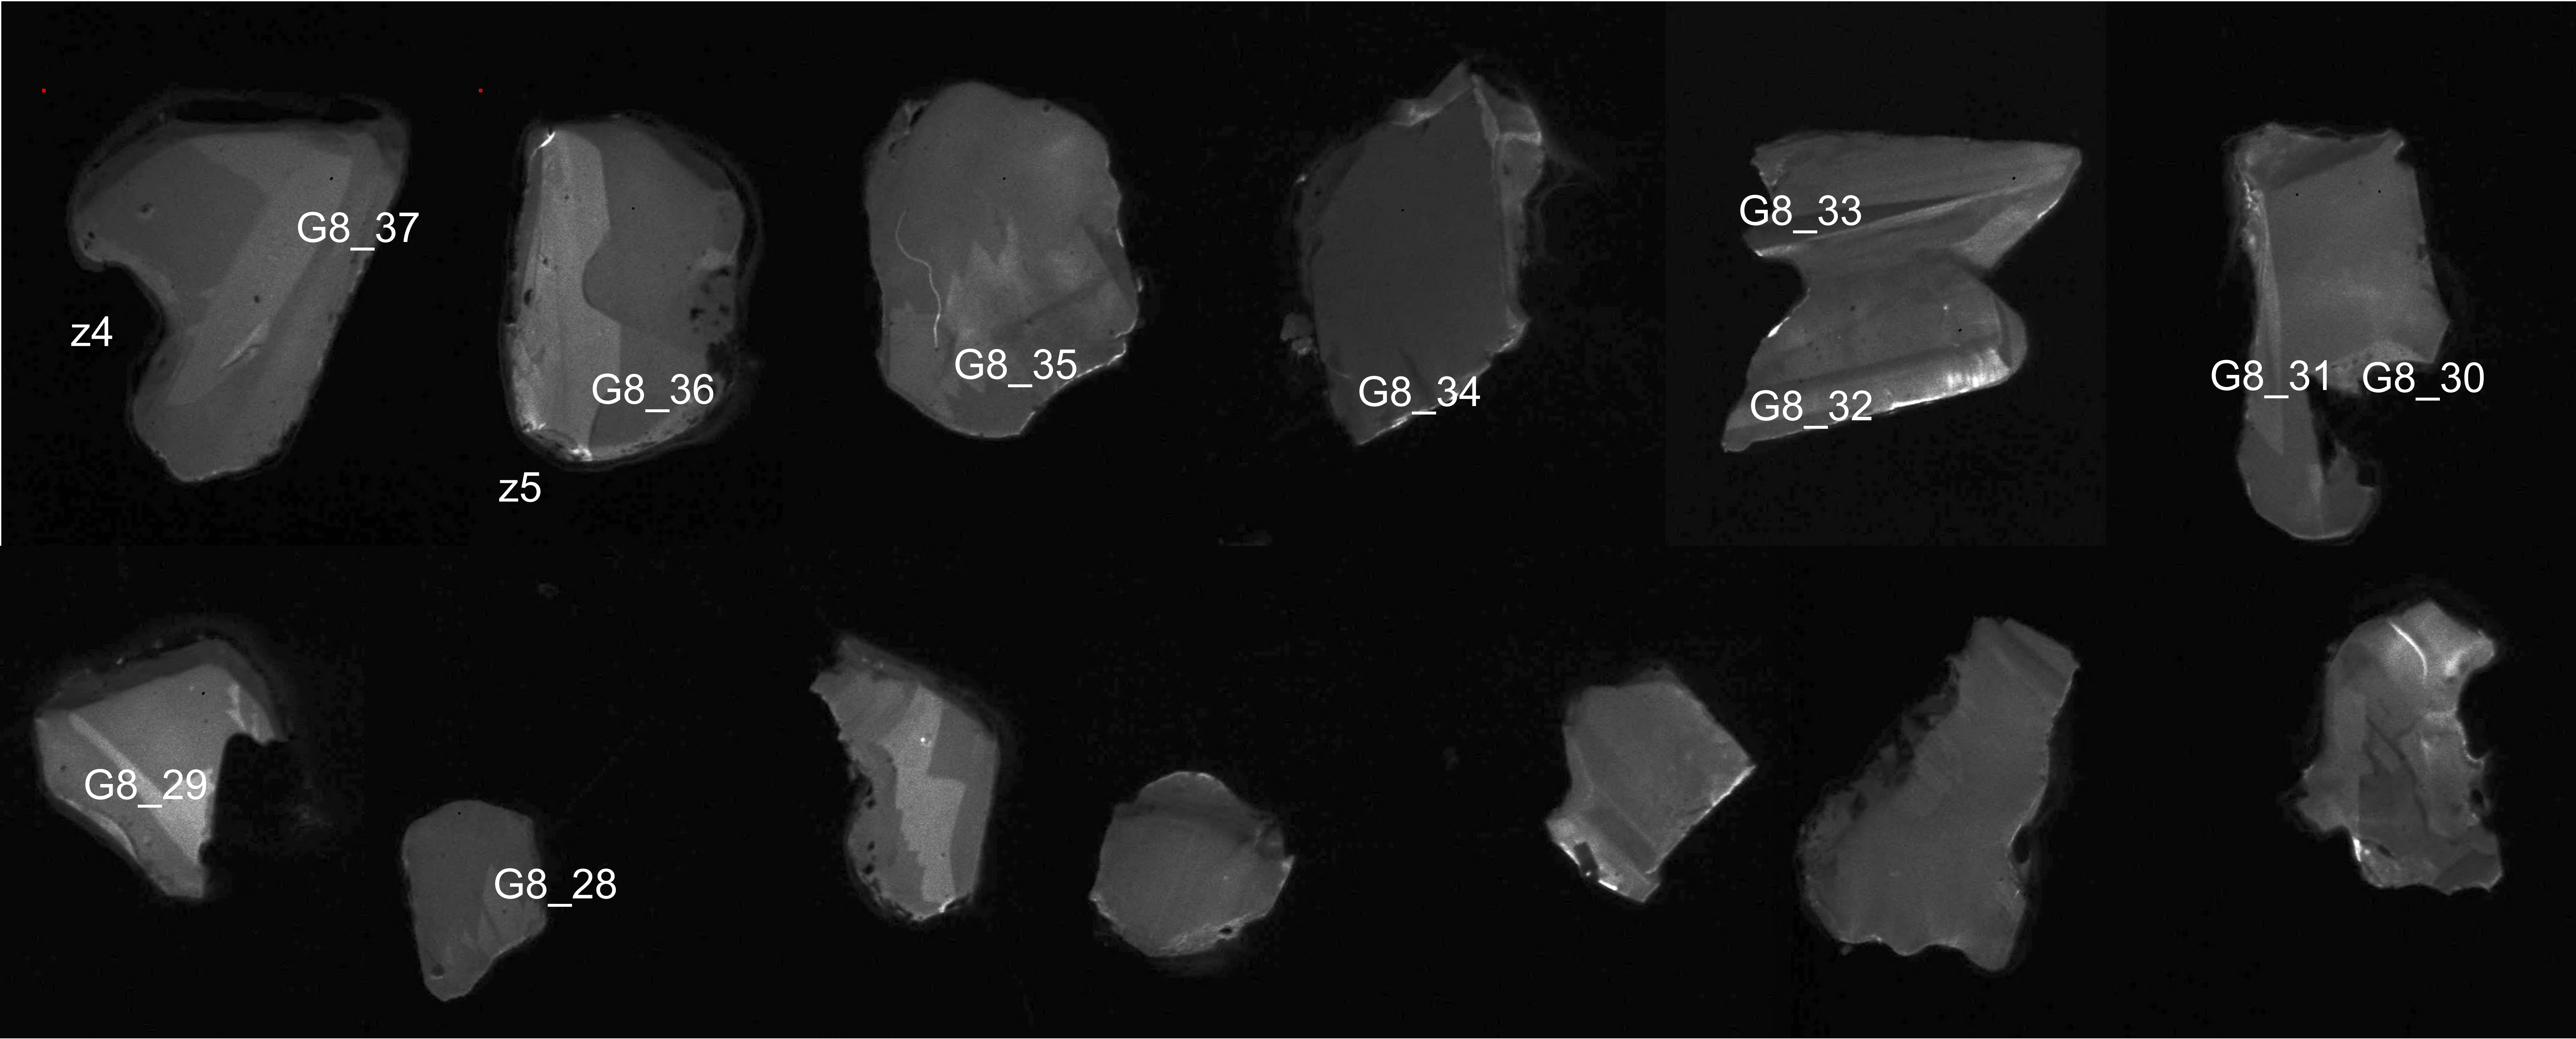



G-8 (row 3)

200x

Feb.08/17

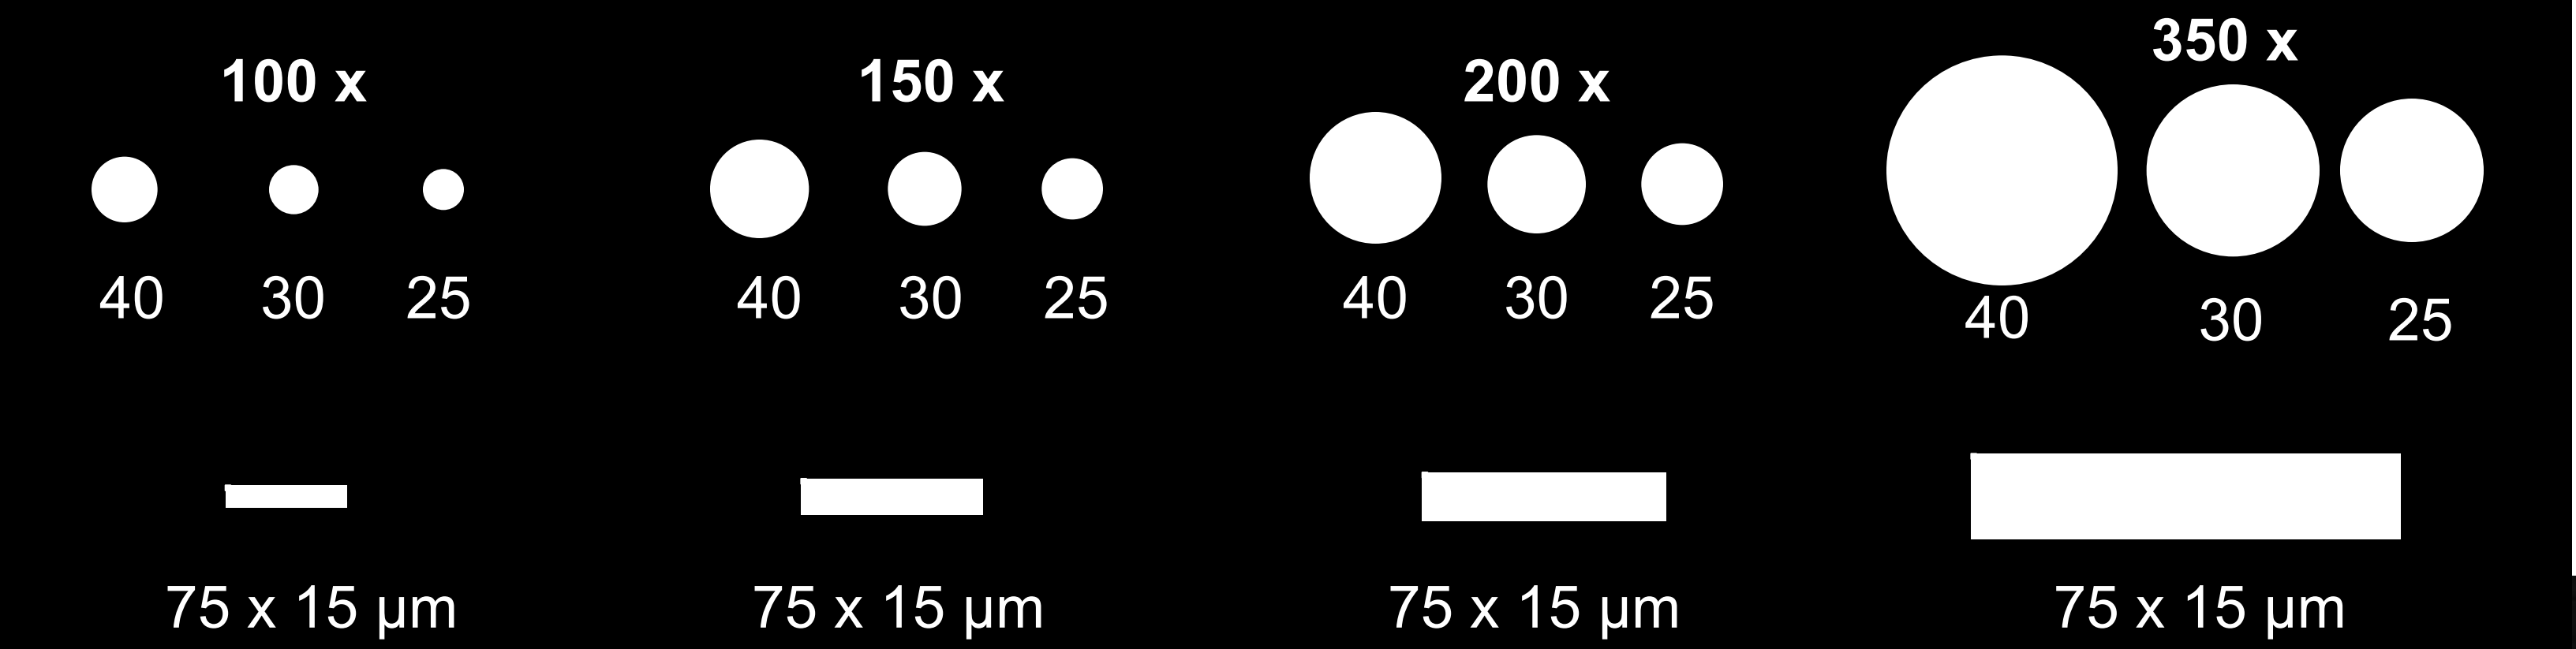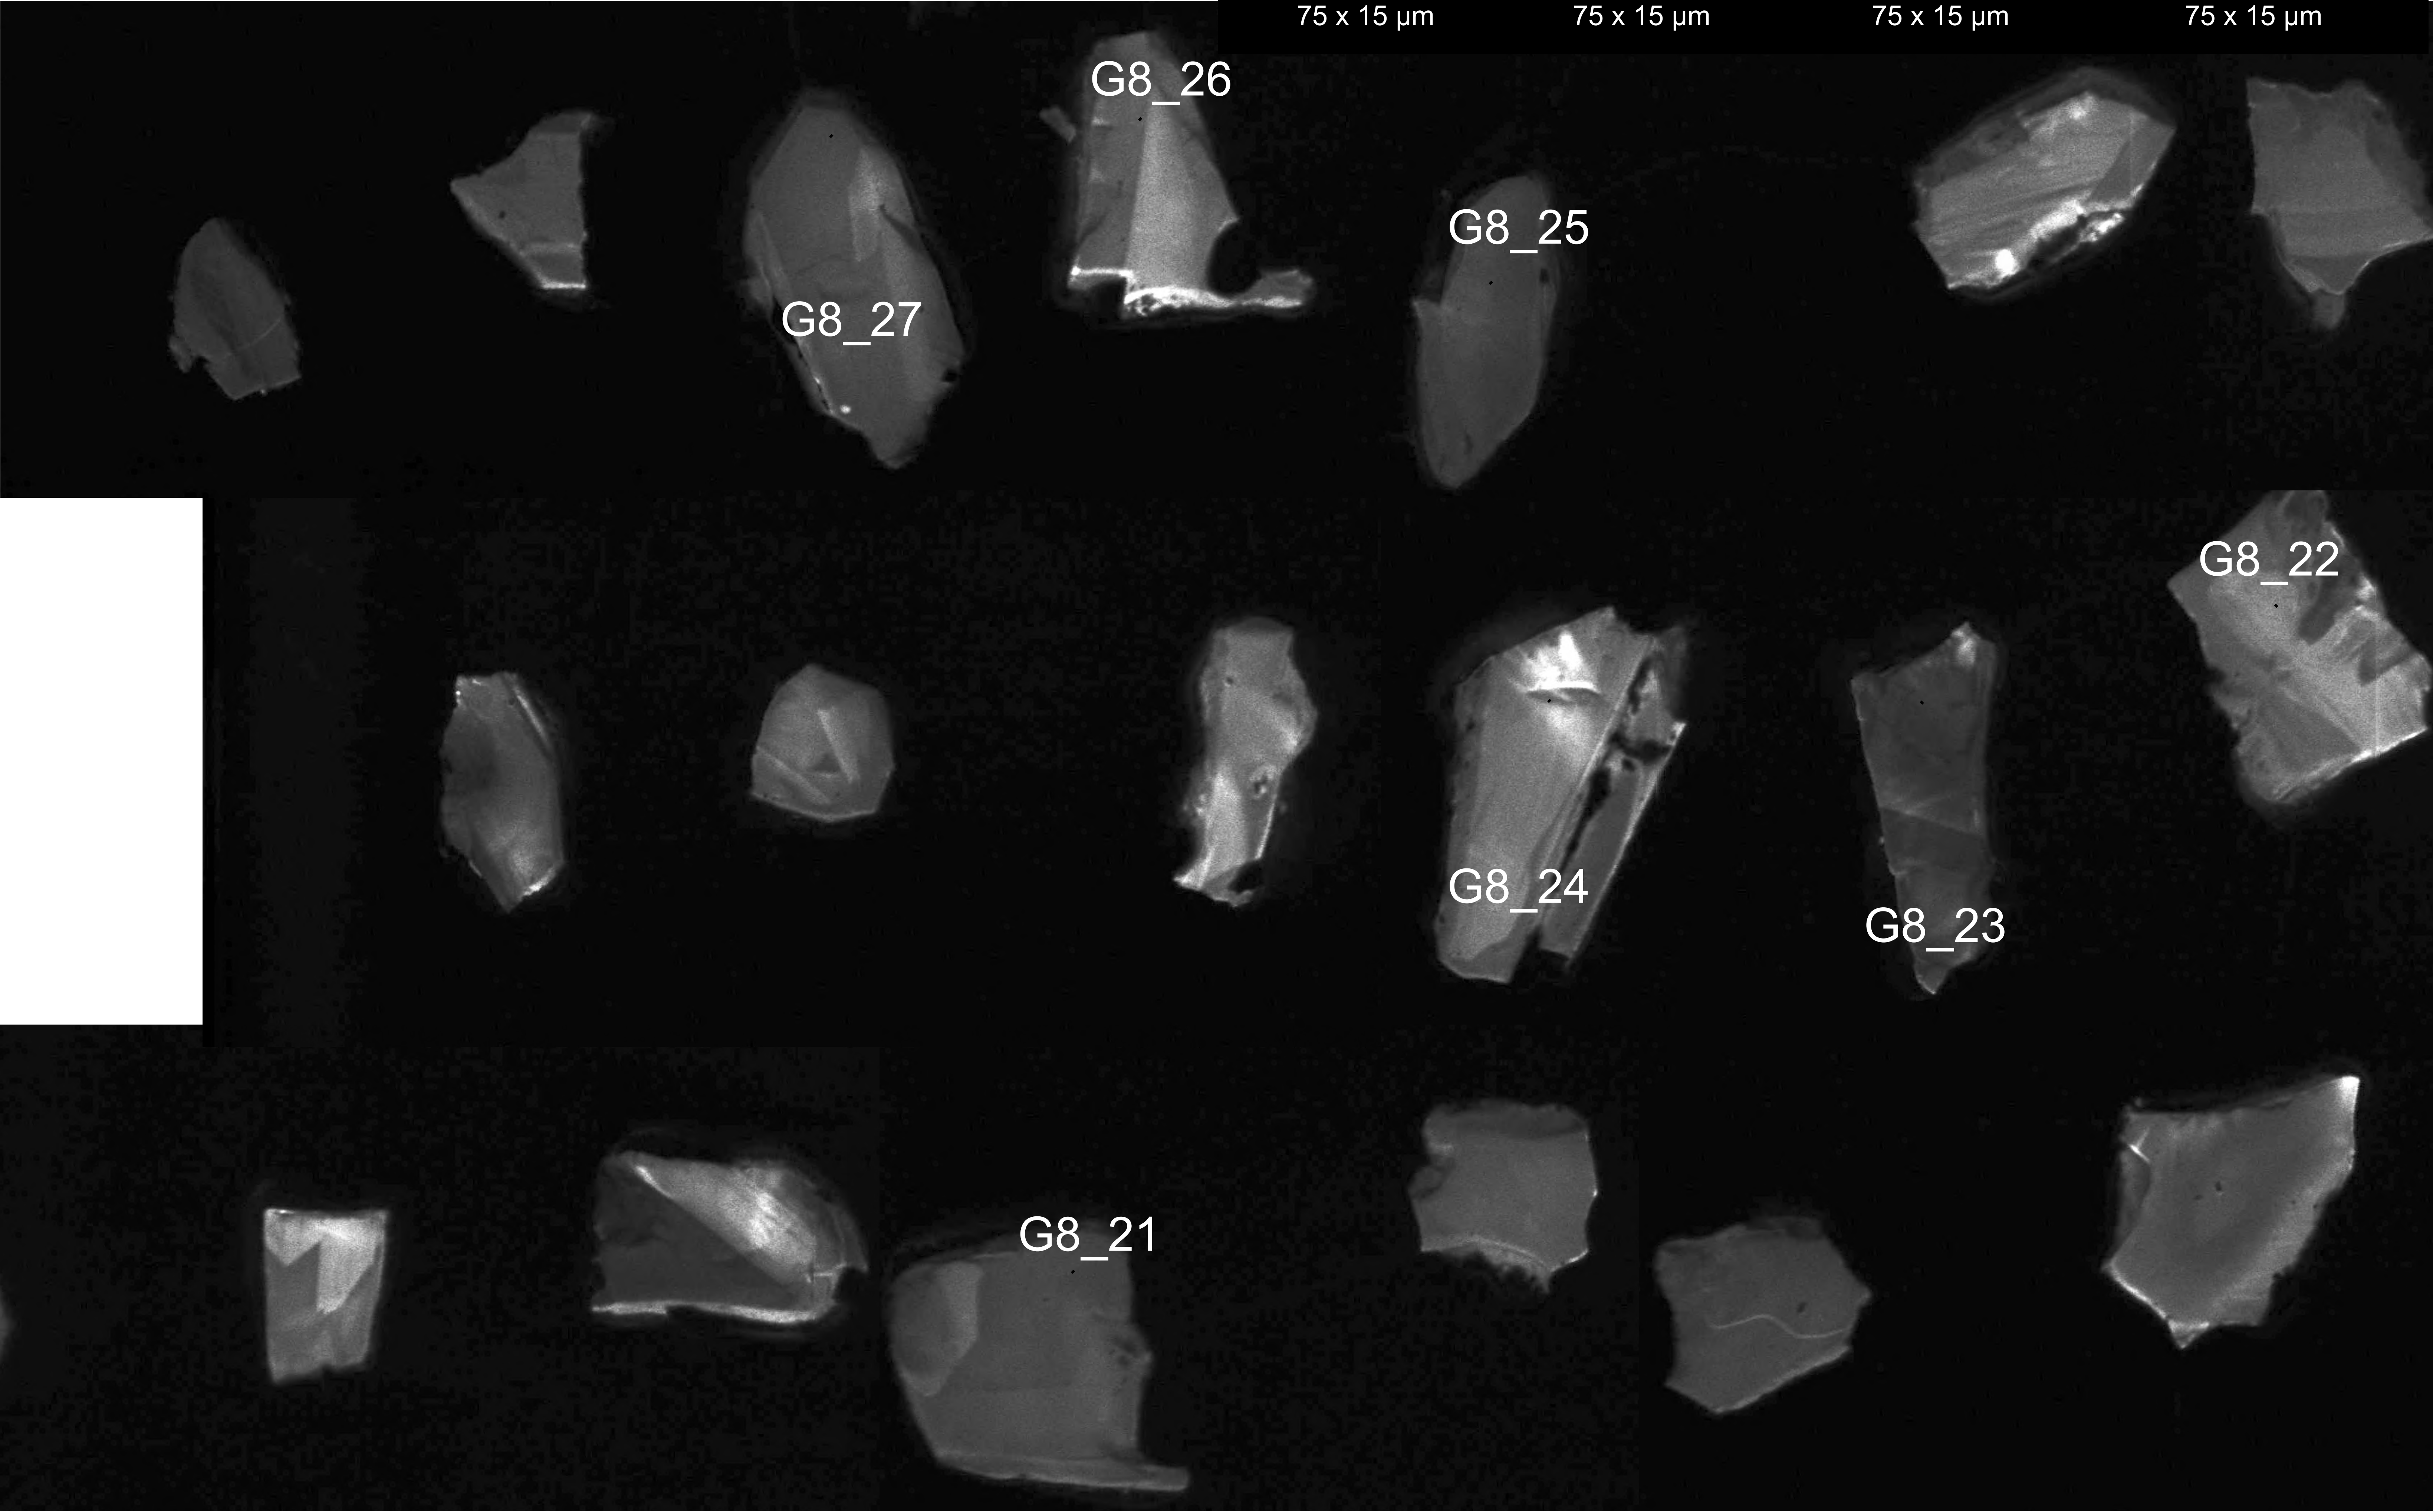



G-8 (row 4)

200x

Feb.08/17

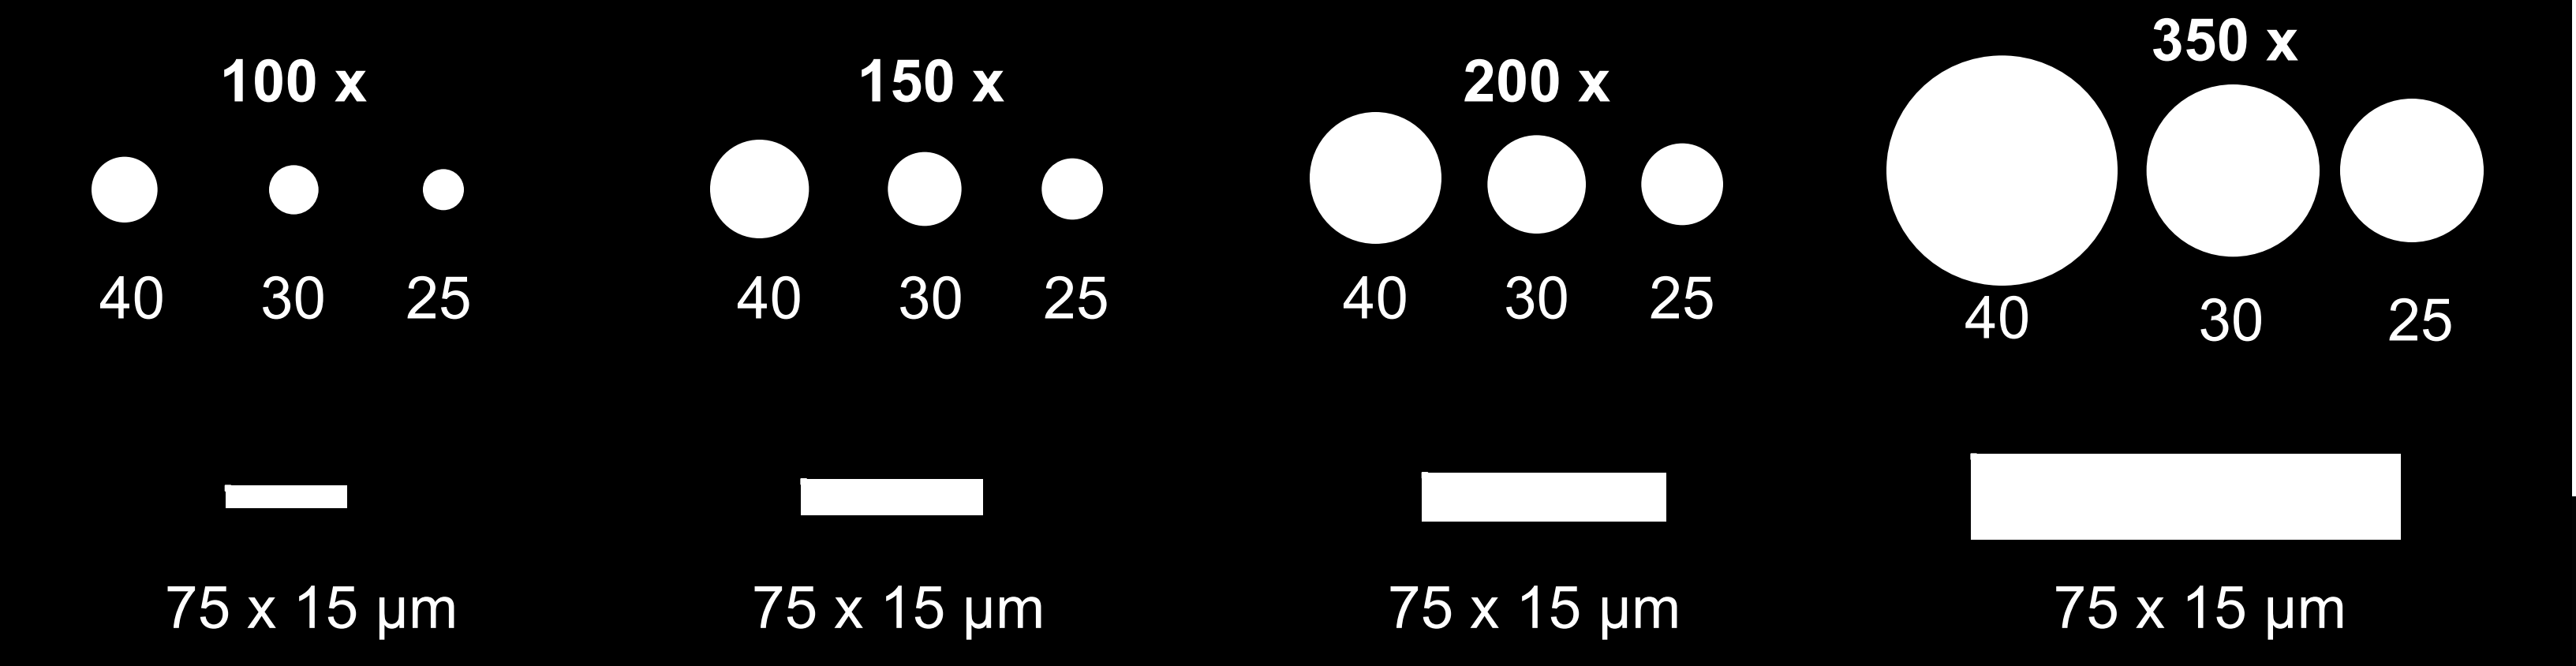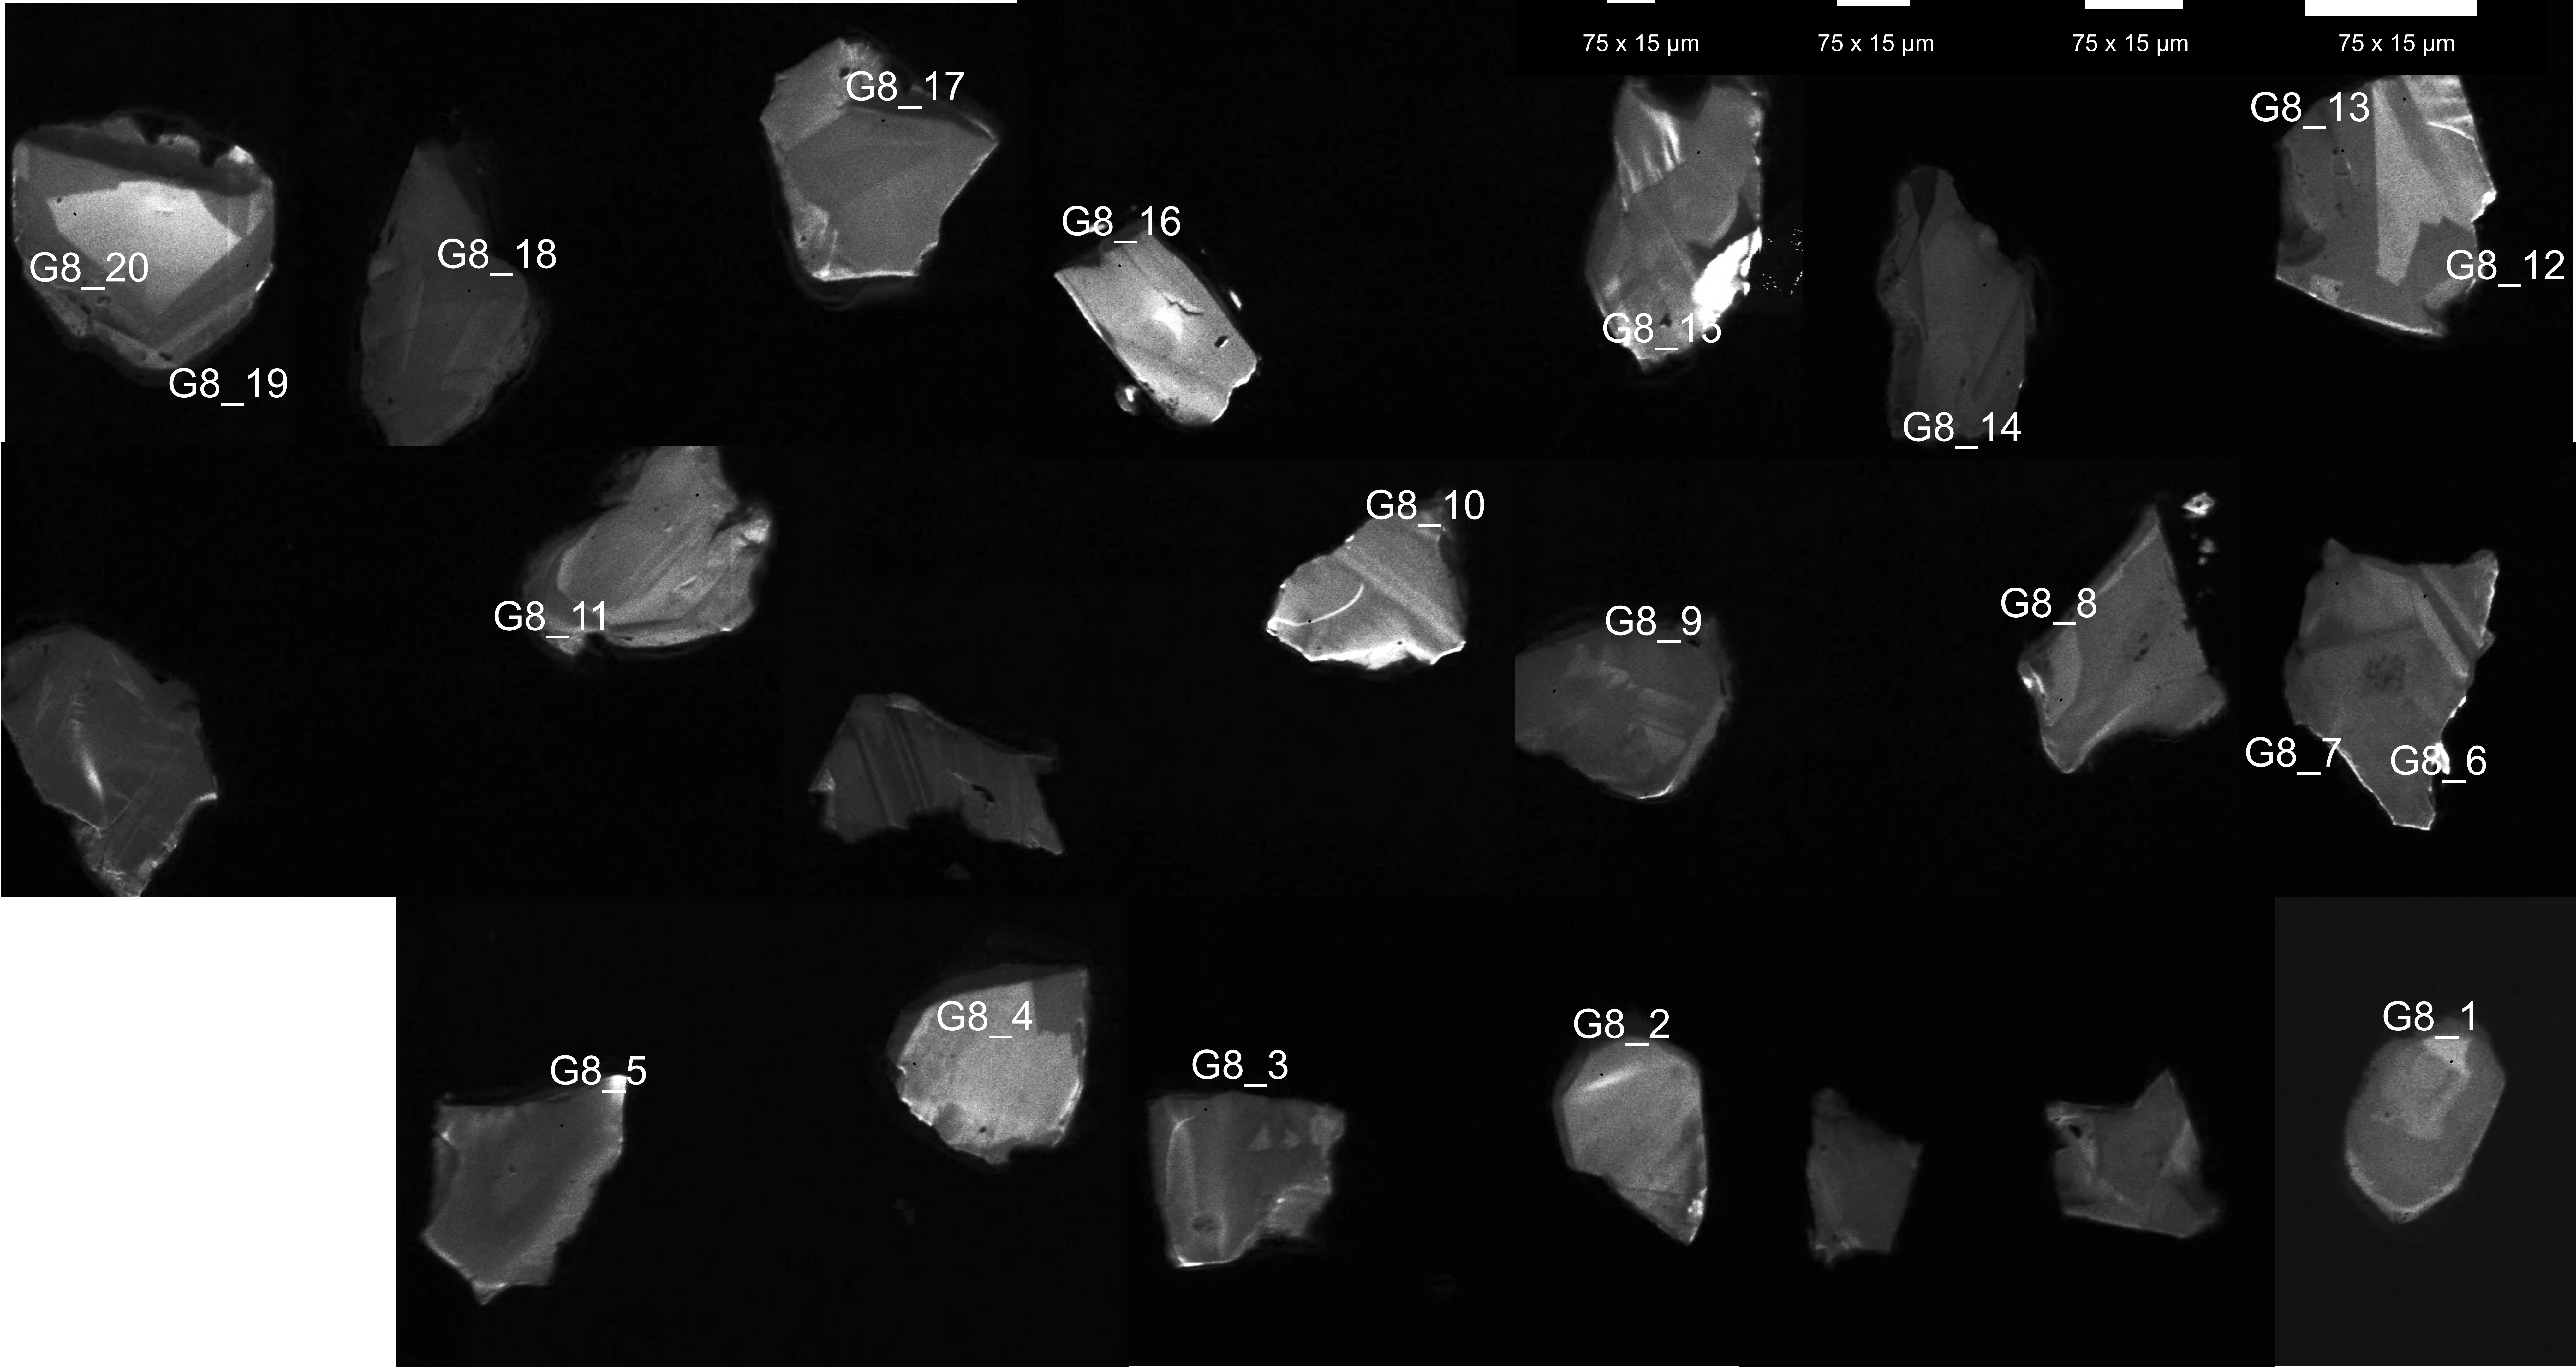



PEG

50x

Oct.02/2019

100 x

40

30

25

75 x 15 μm

150 x

40

30

25

75 x 15 μm

200 x

40

30

25

75 x 15 μm

350 x

40

30

25

75 x 15 μm

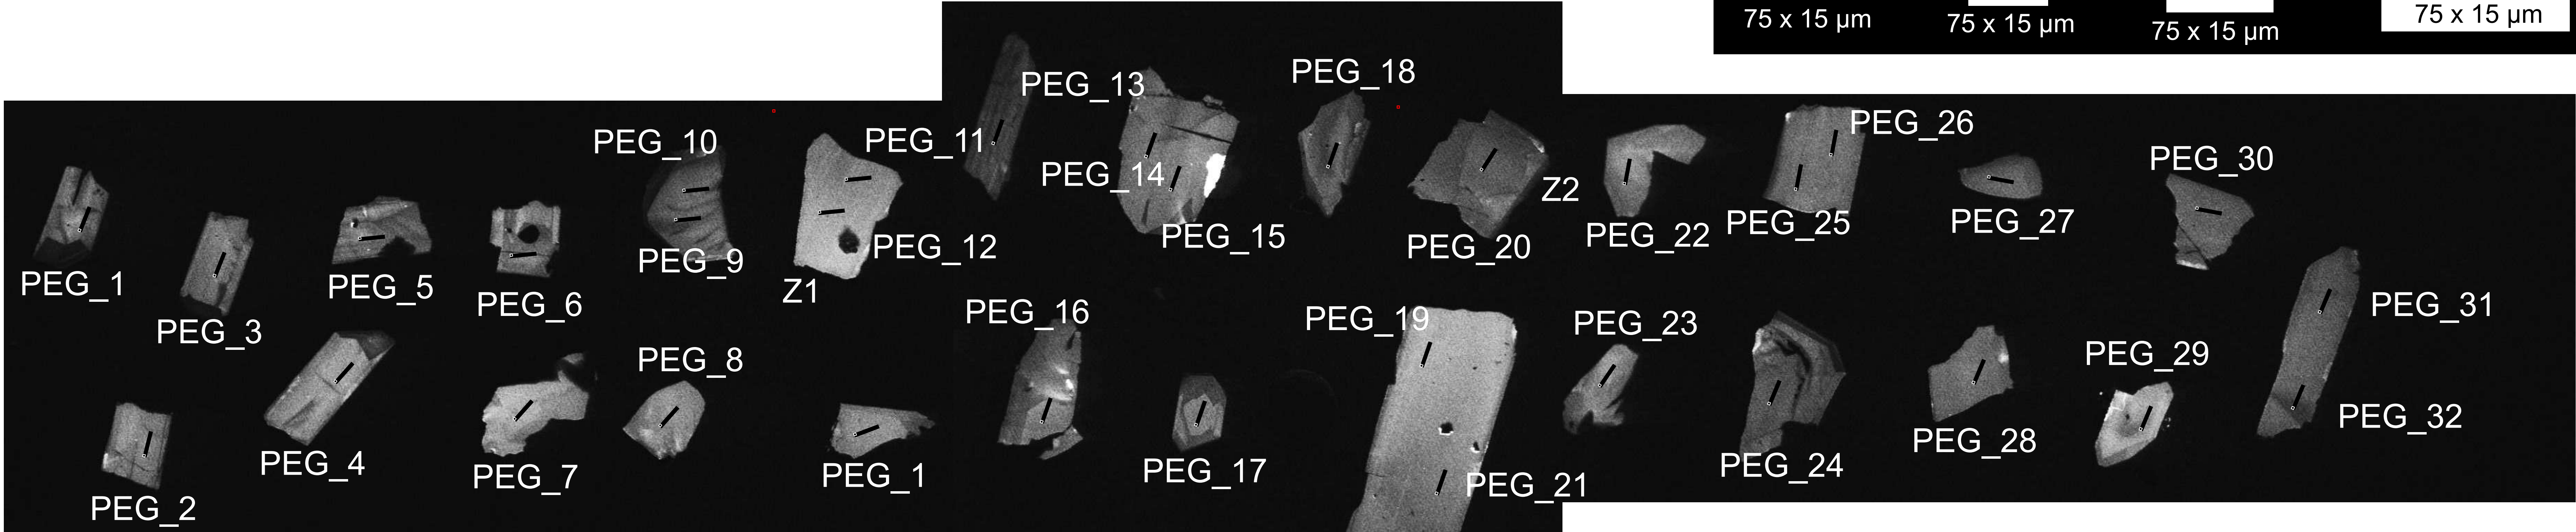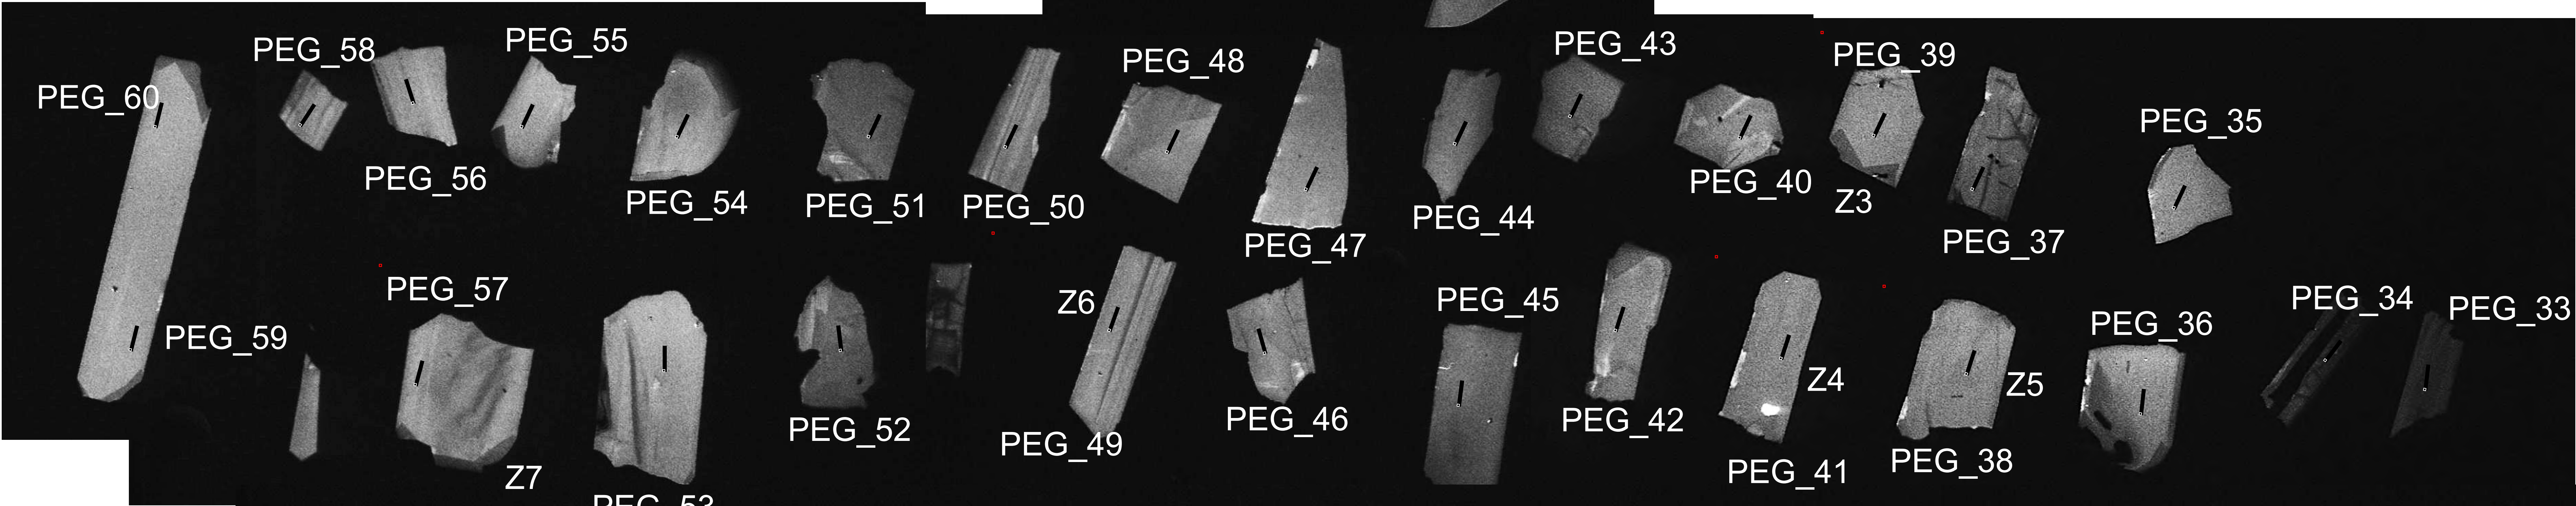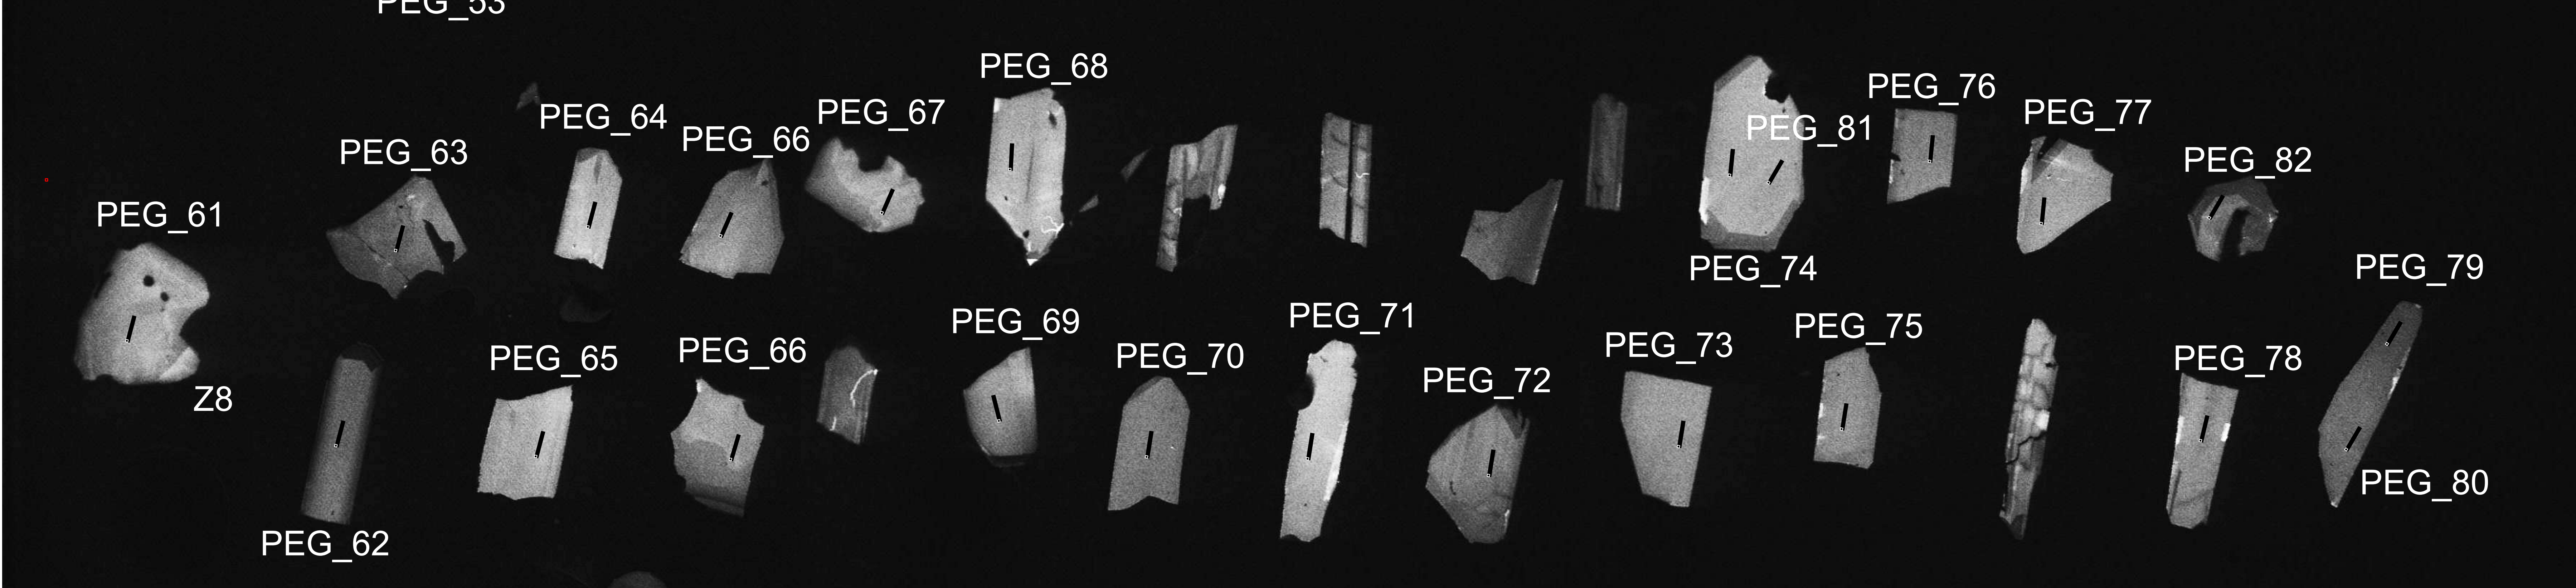



JP-22 (row 1)

200x

Feb.8/17

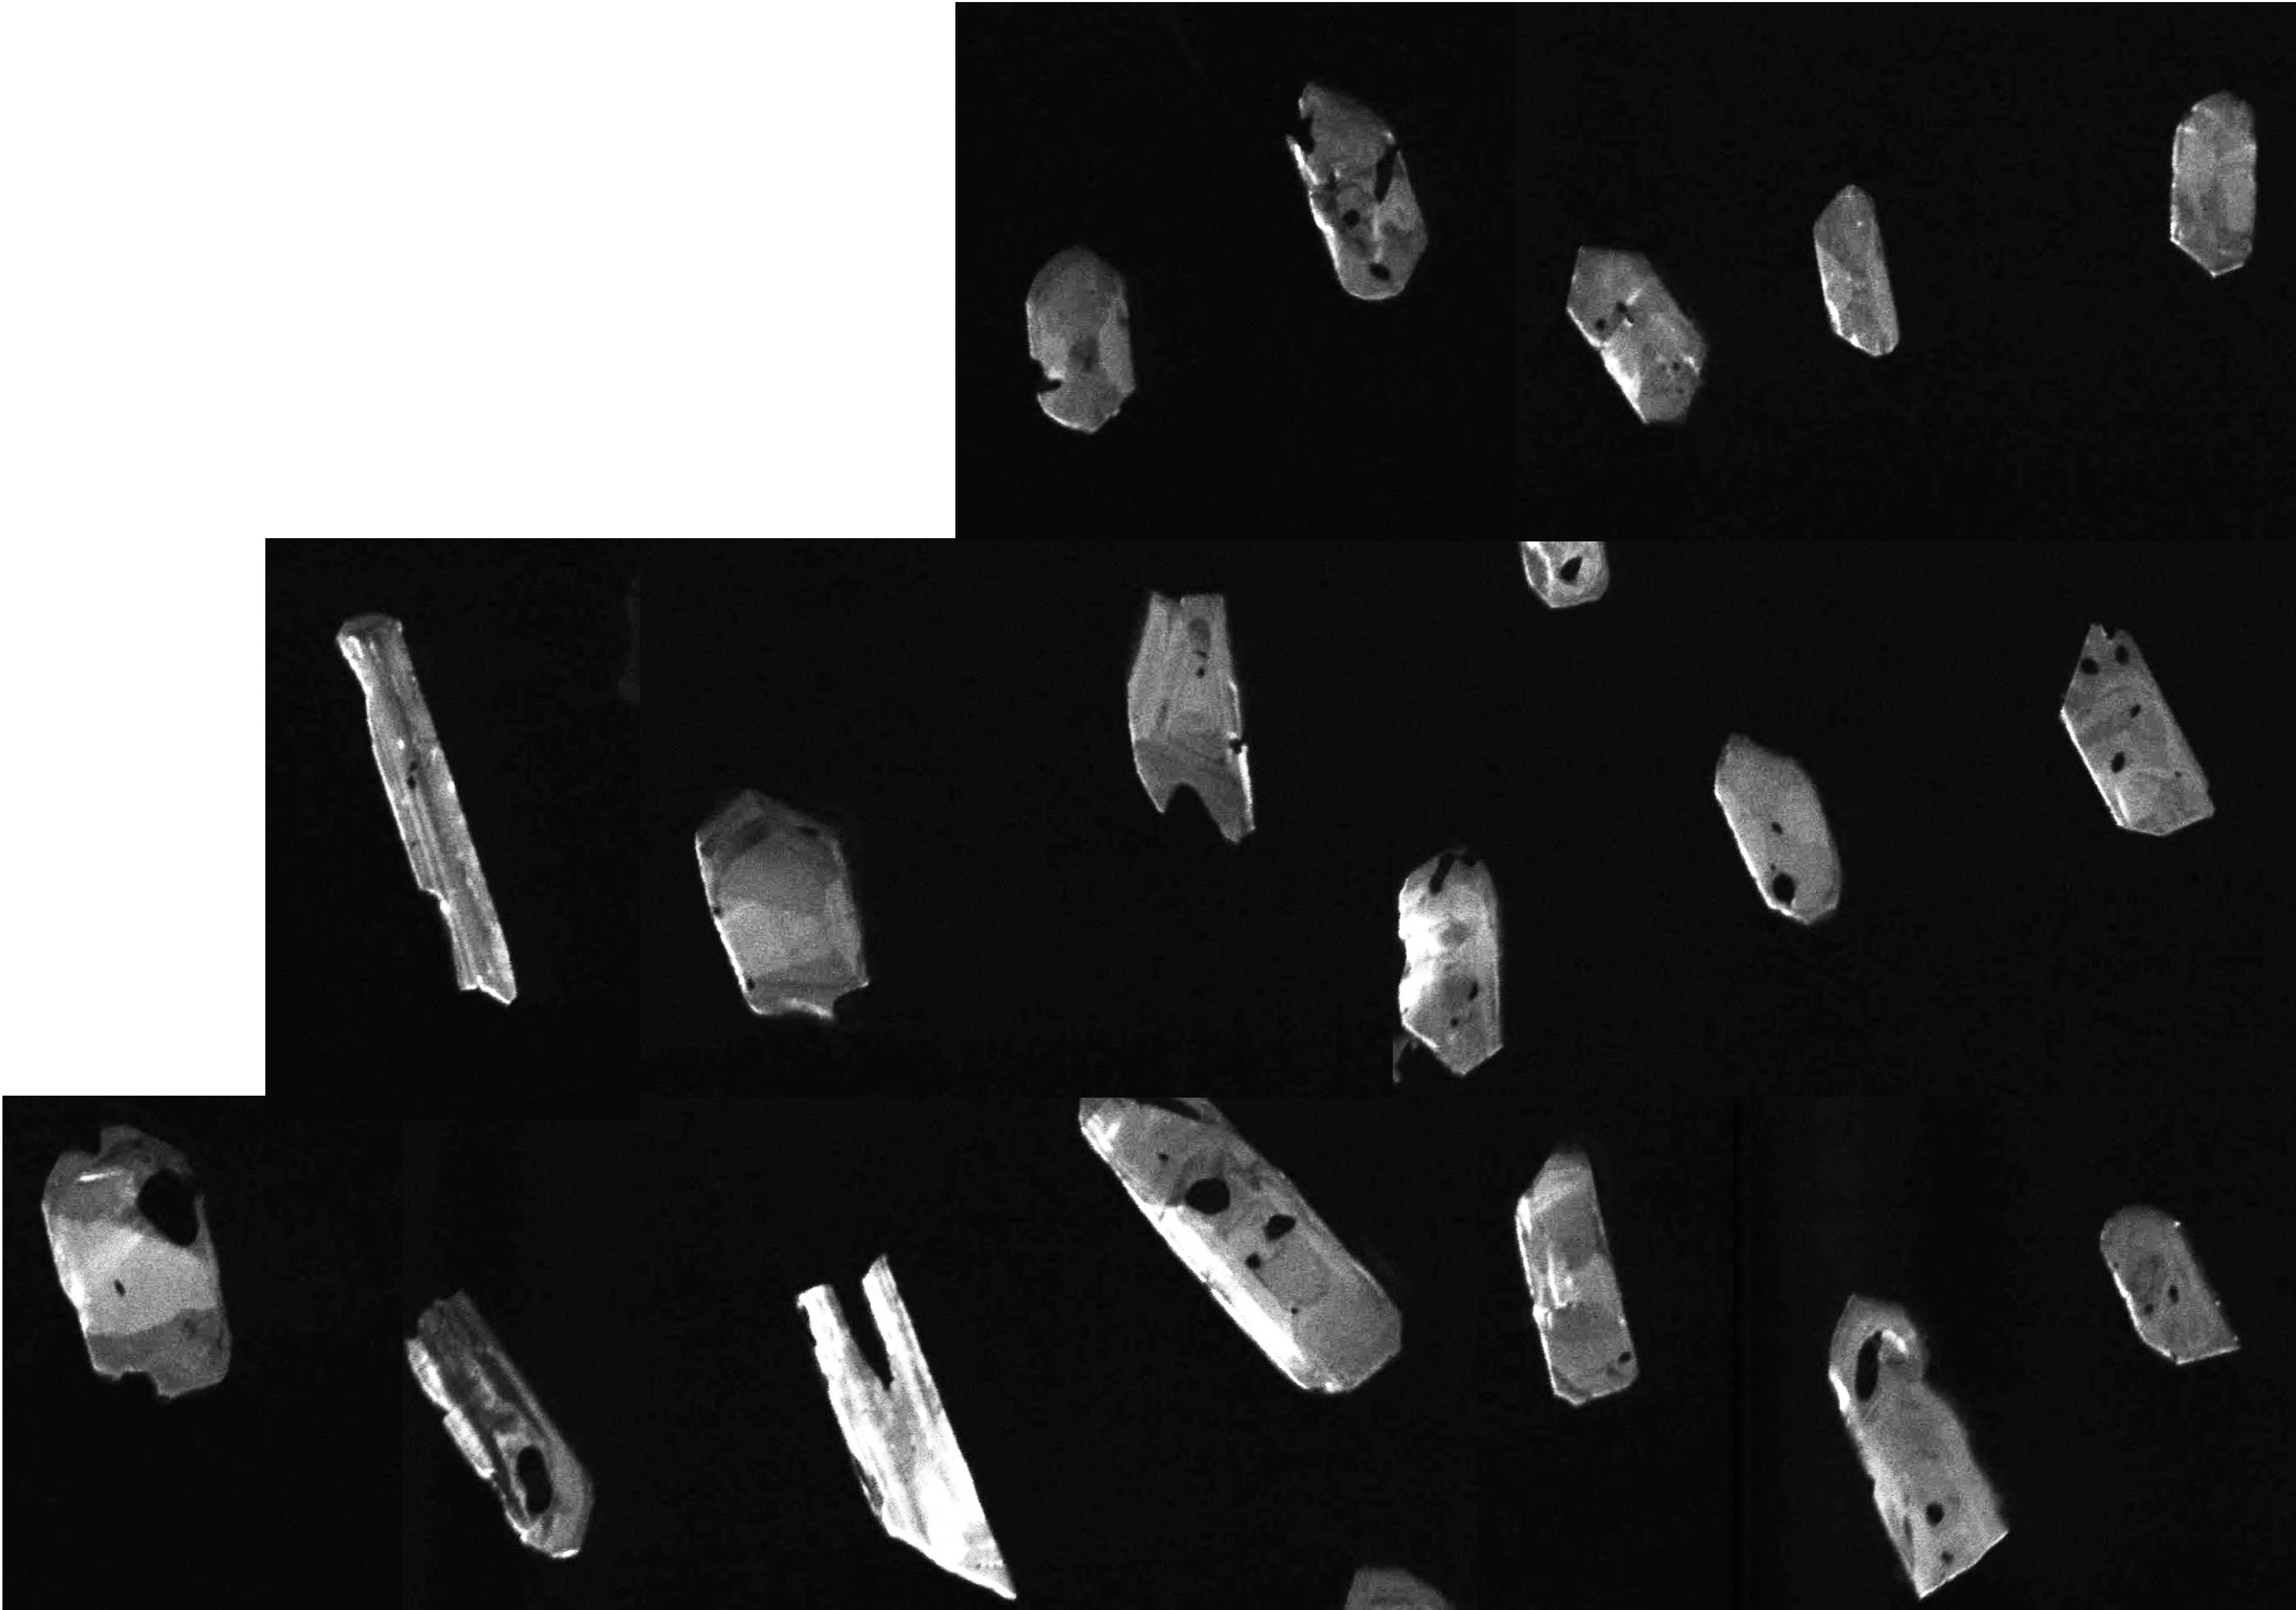



JP-22 (row 2)      200x      Feb.8/17

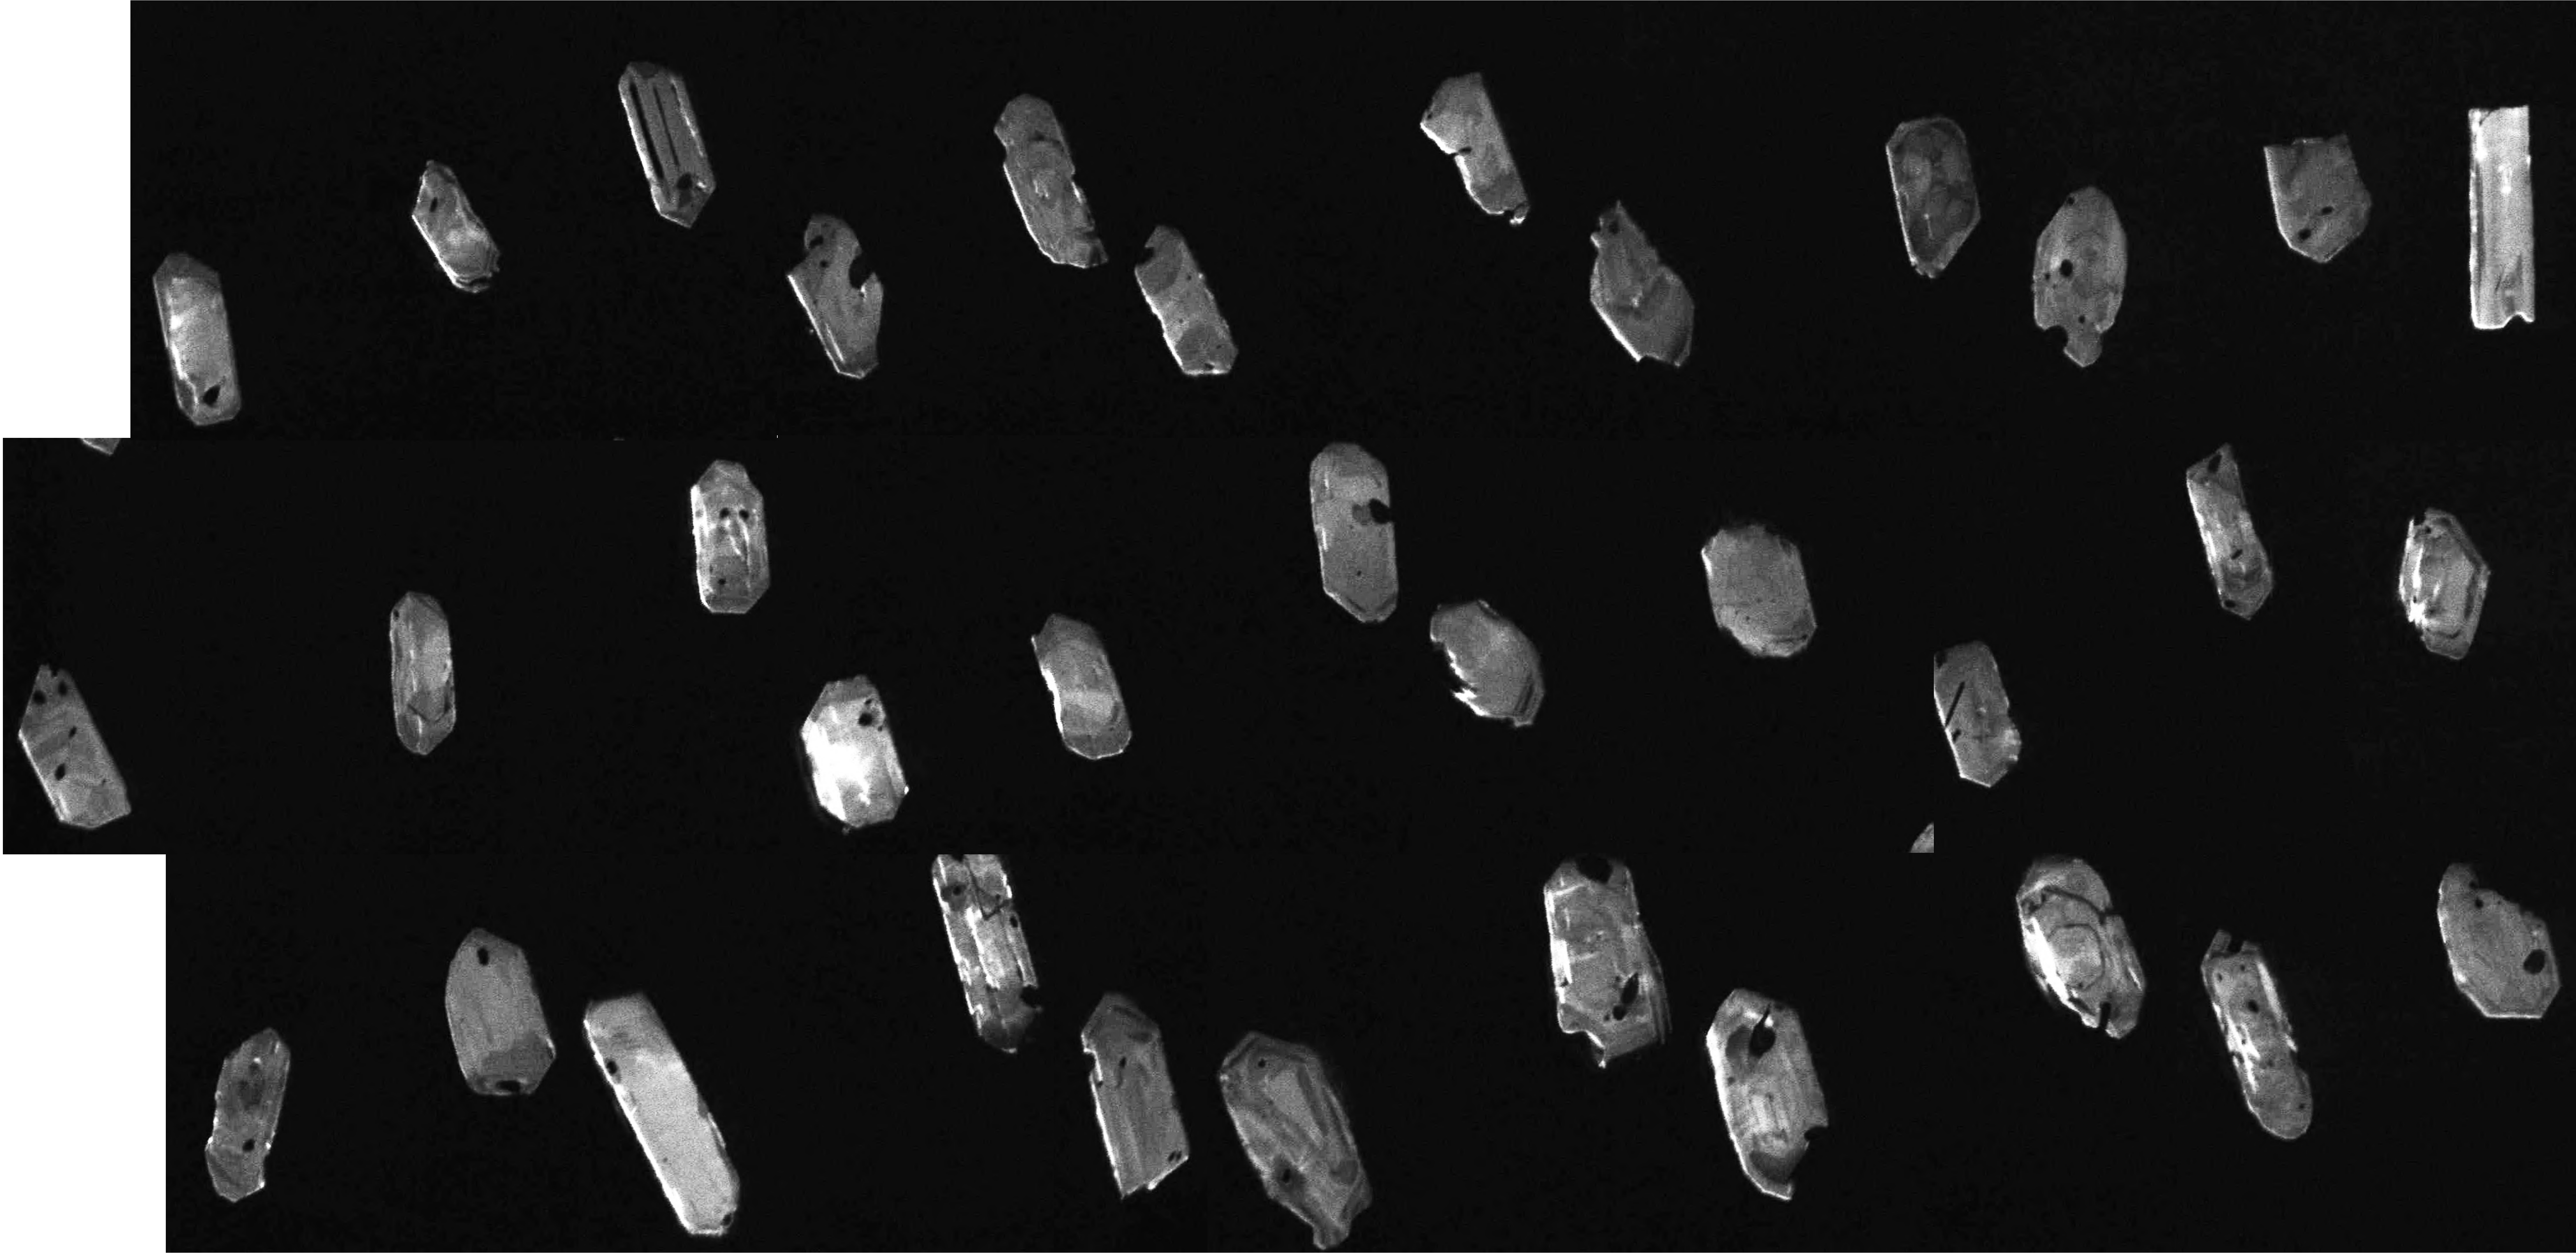



JP-22 (row 3)      200x      Feb.8/17

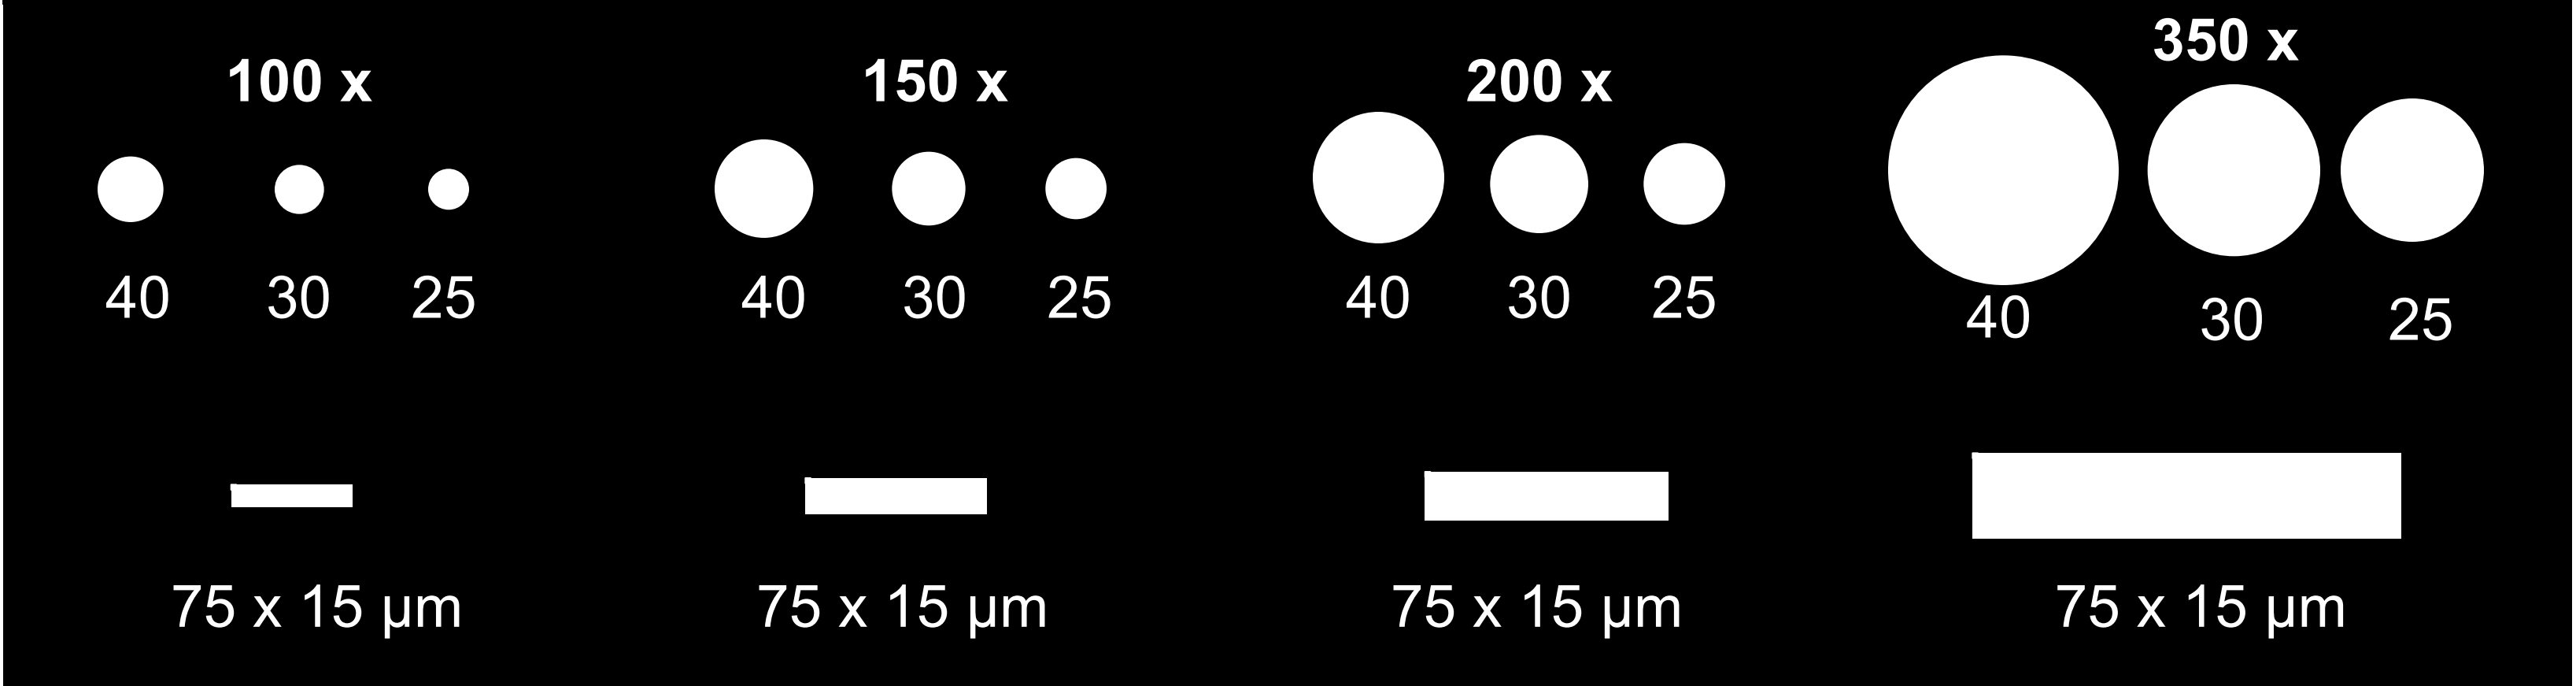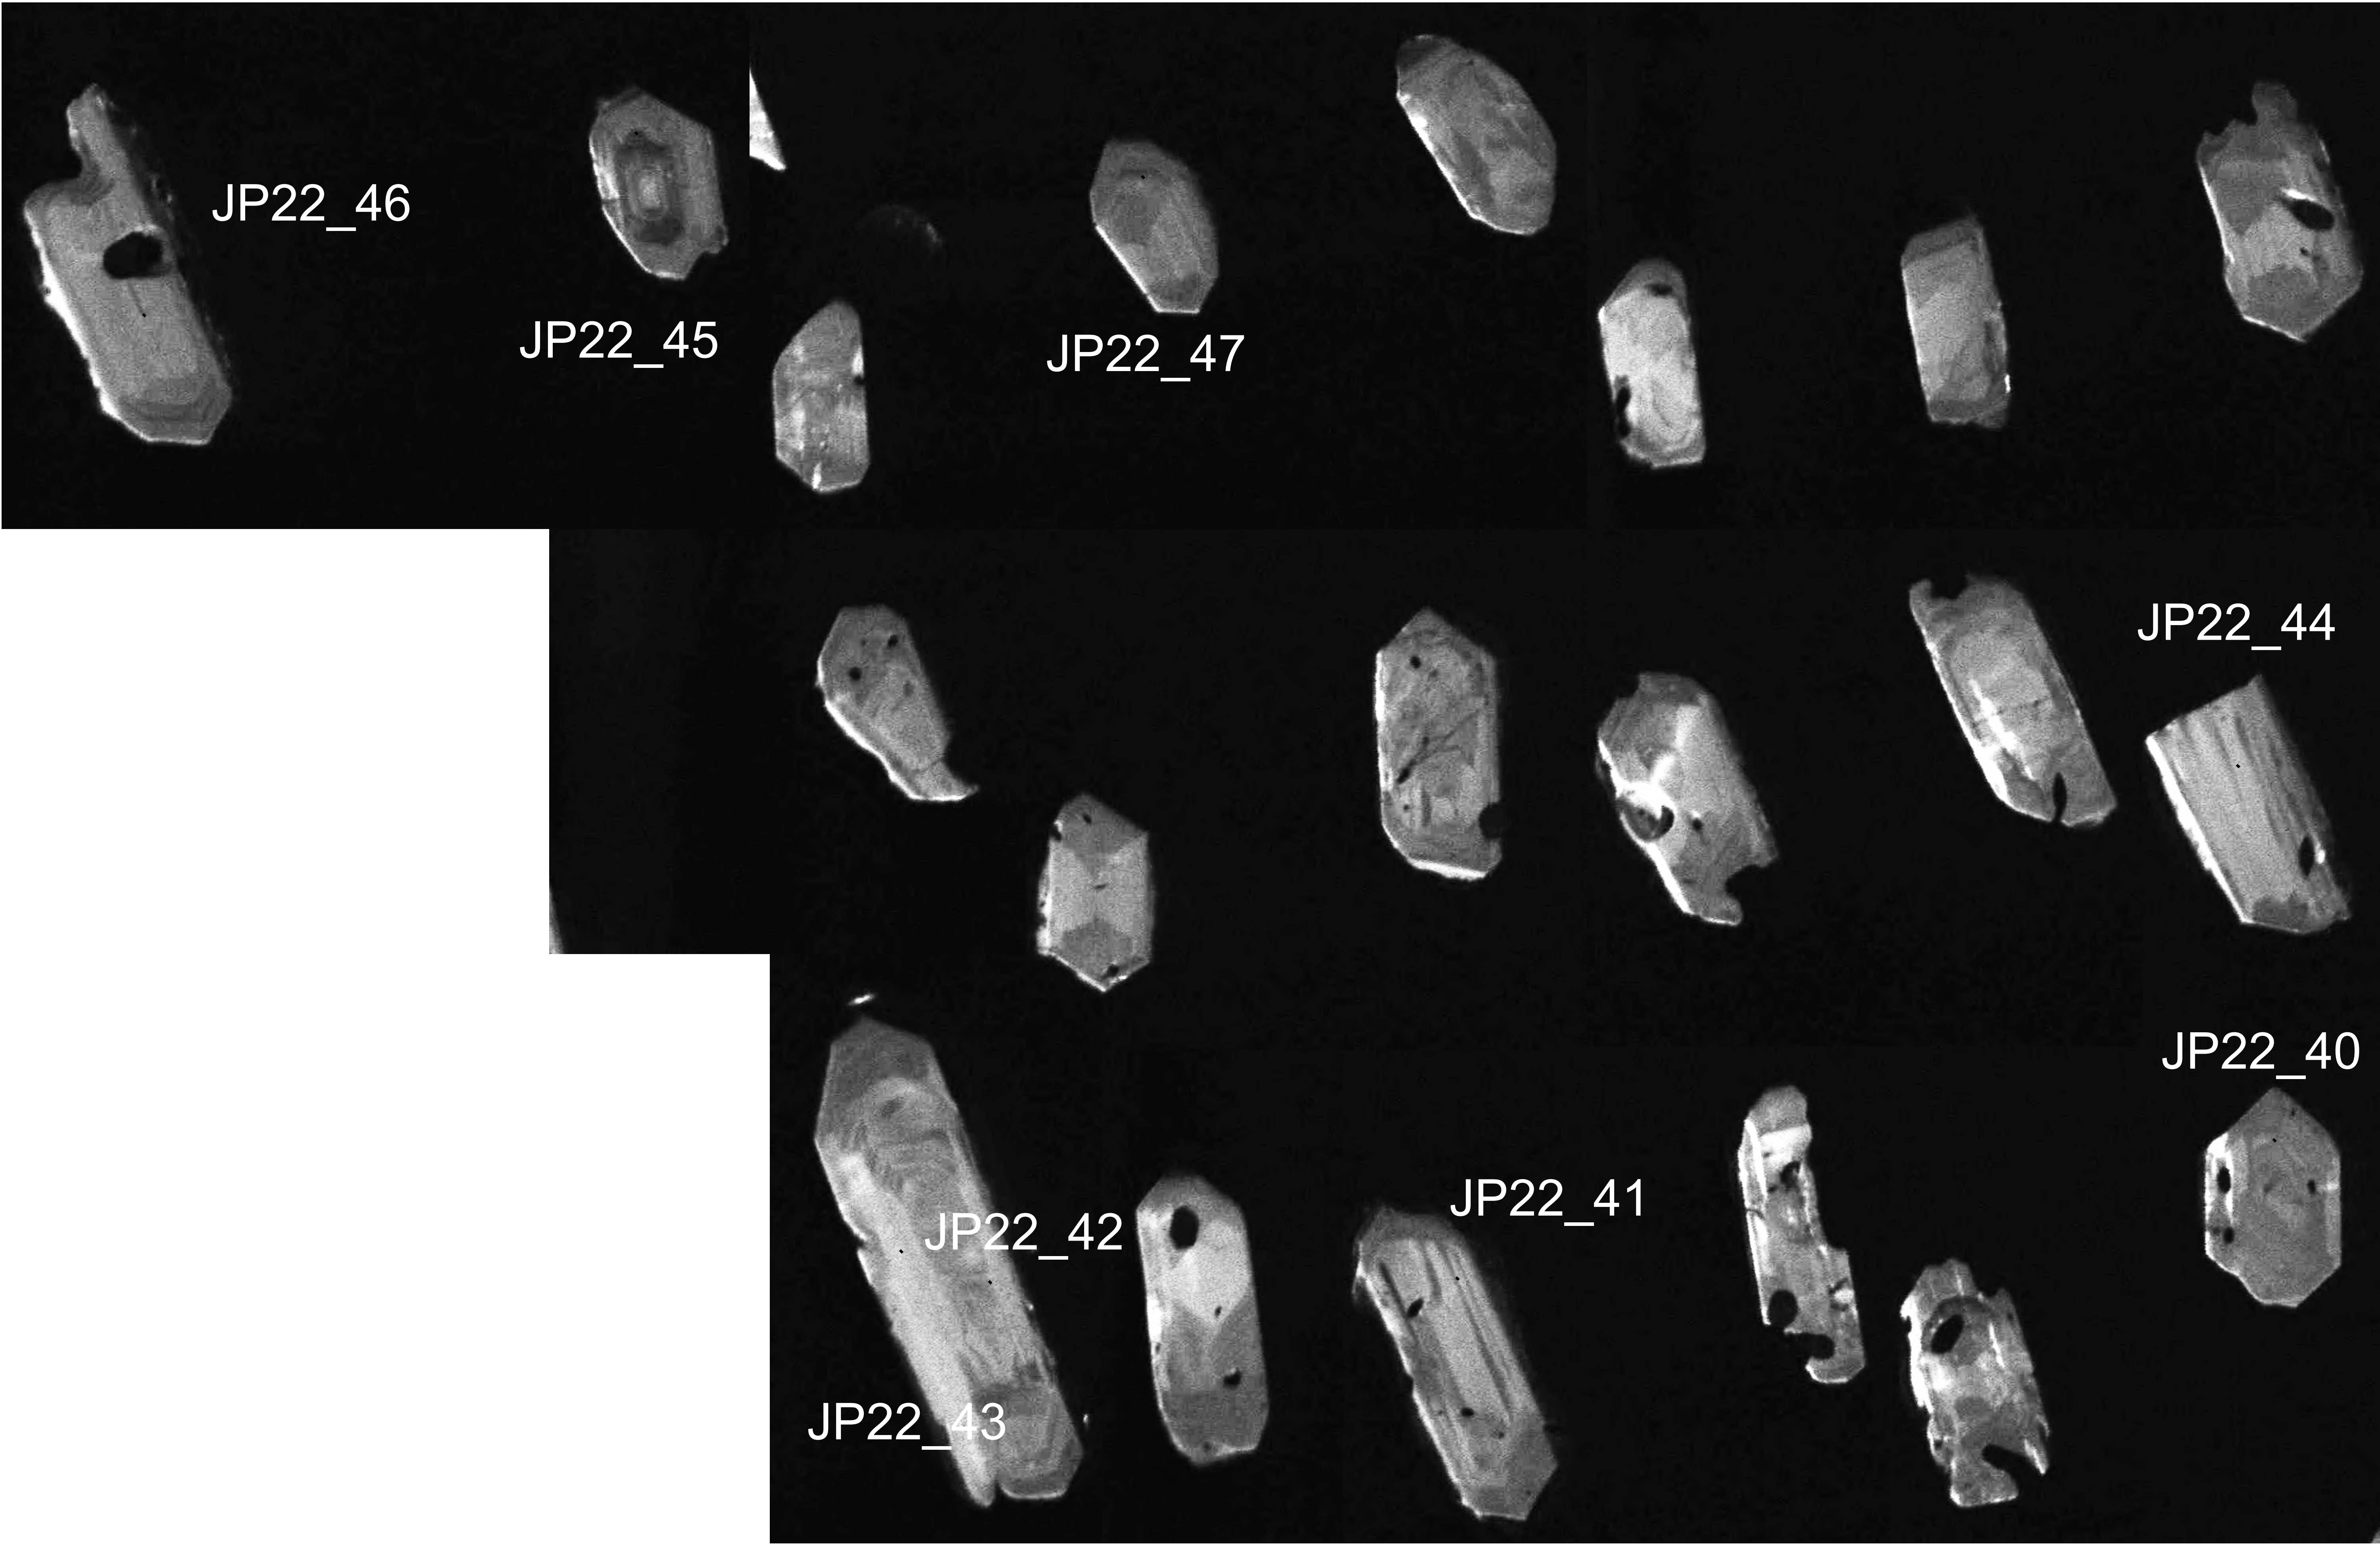



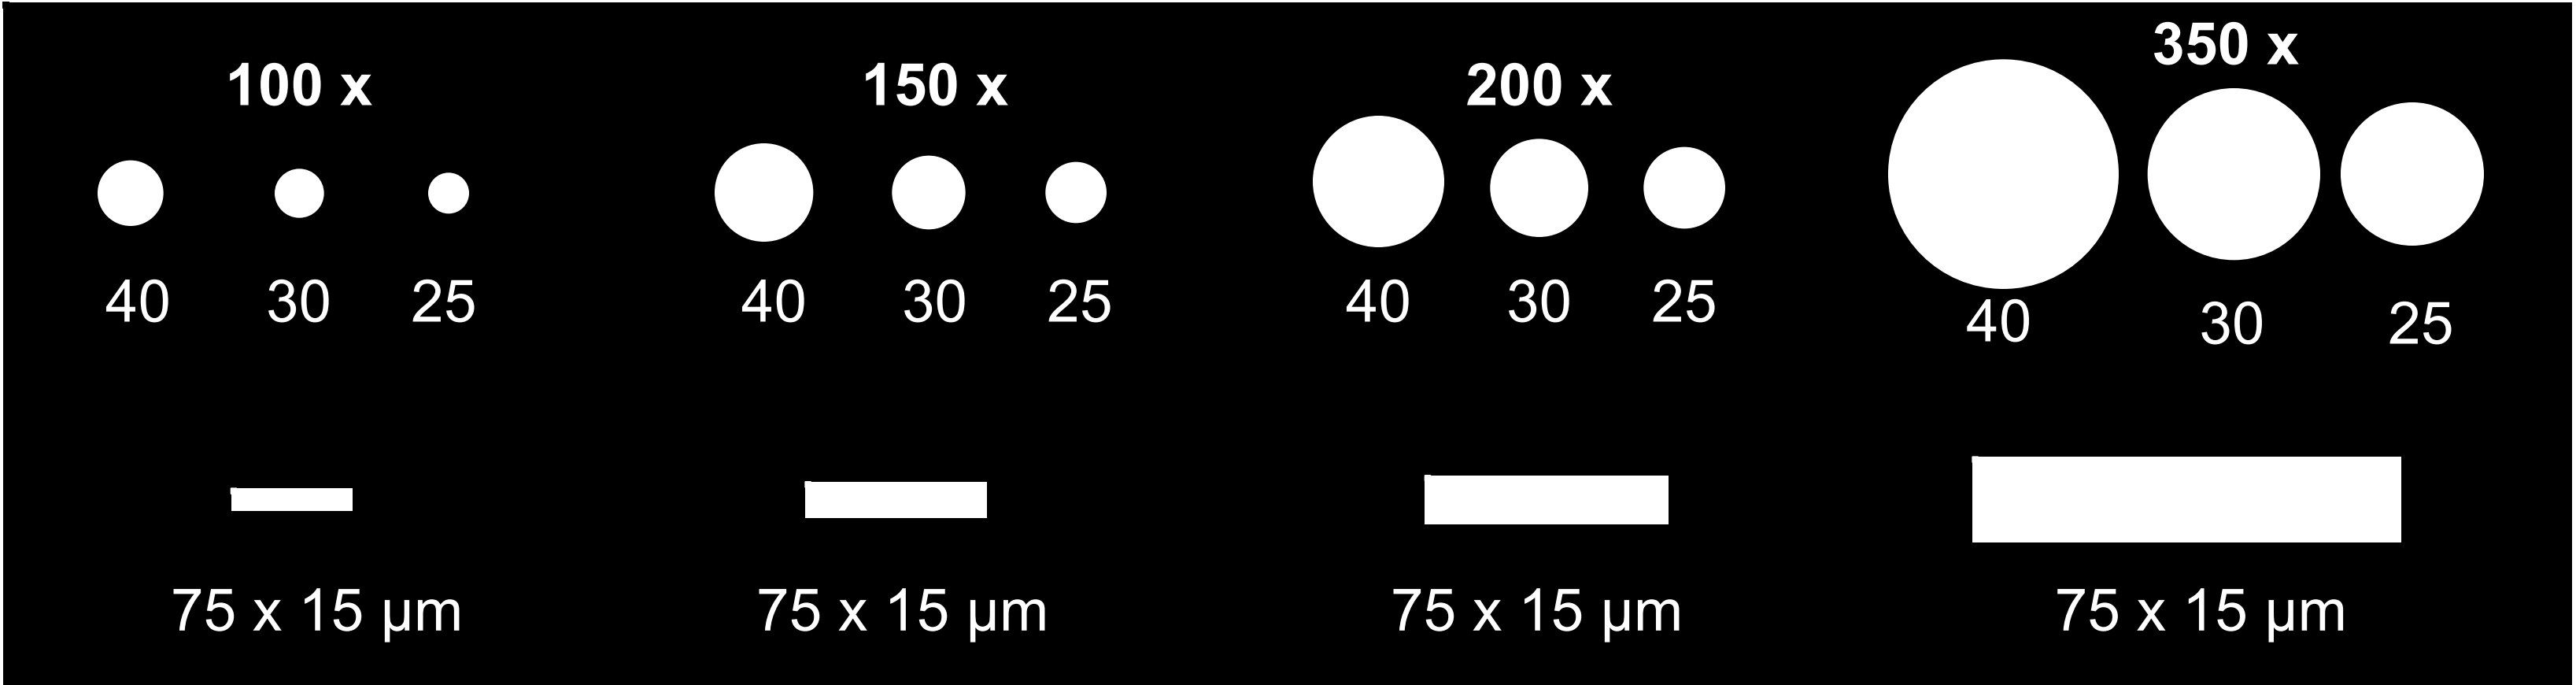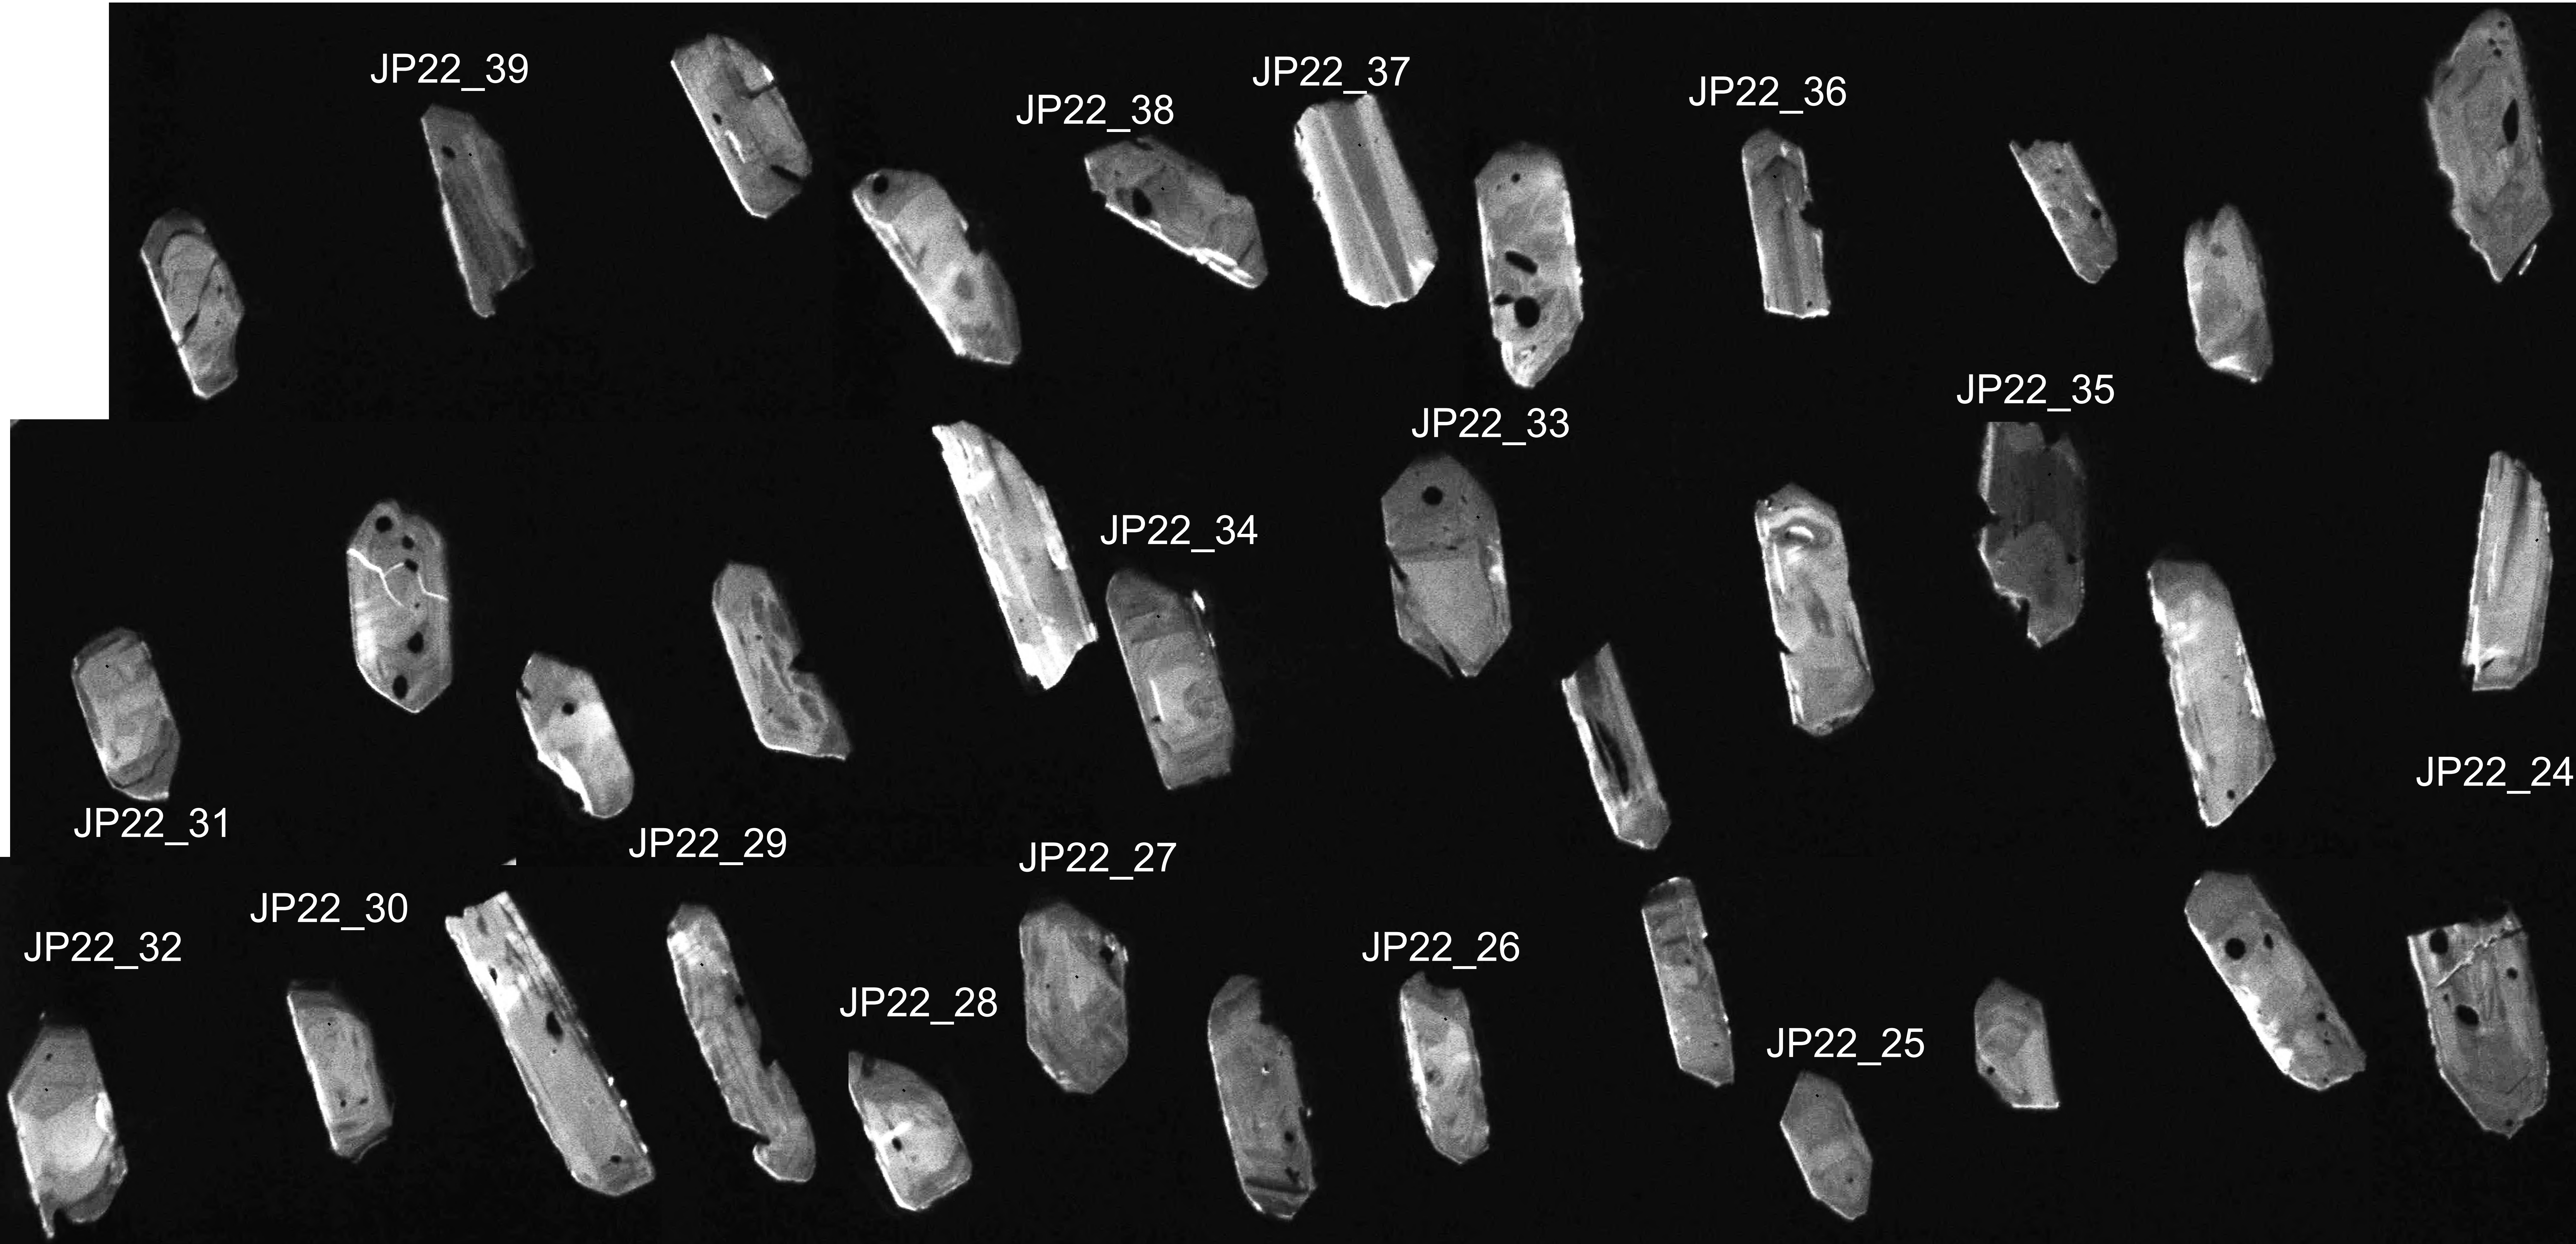



JP-22 (row 5)      200x

Feb.8/17

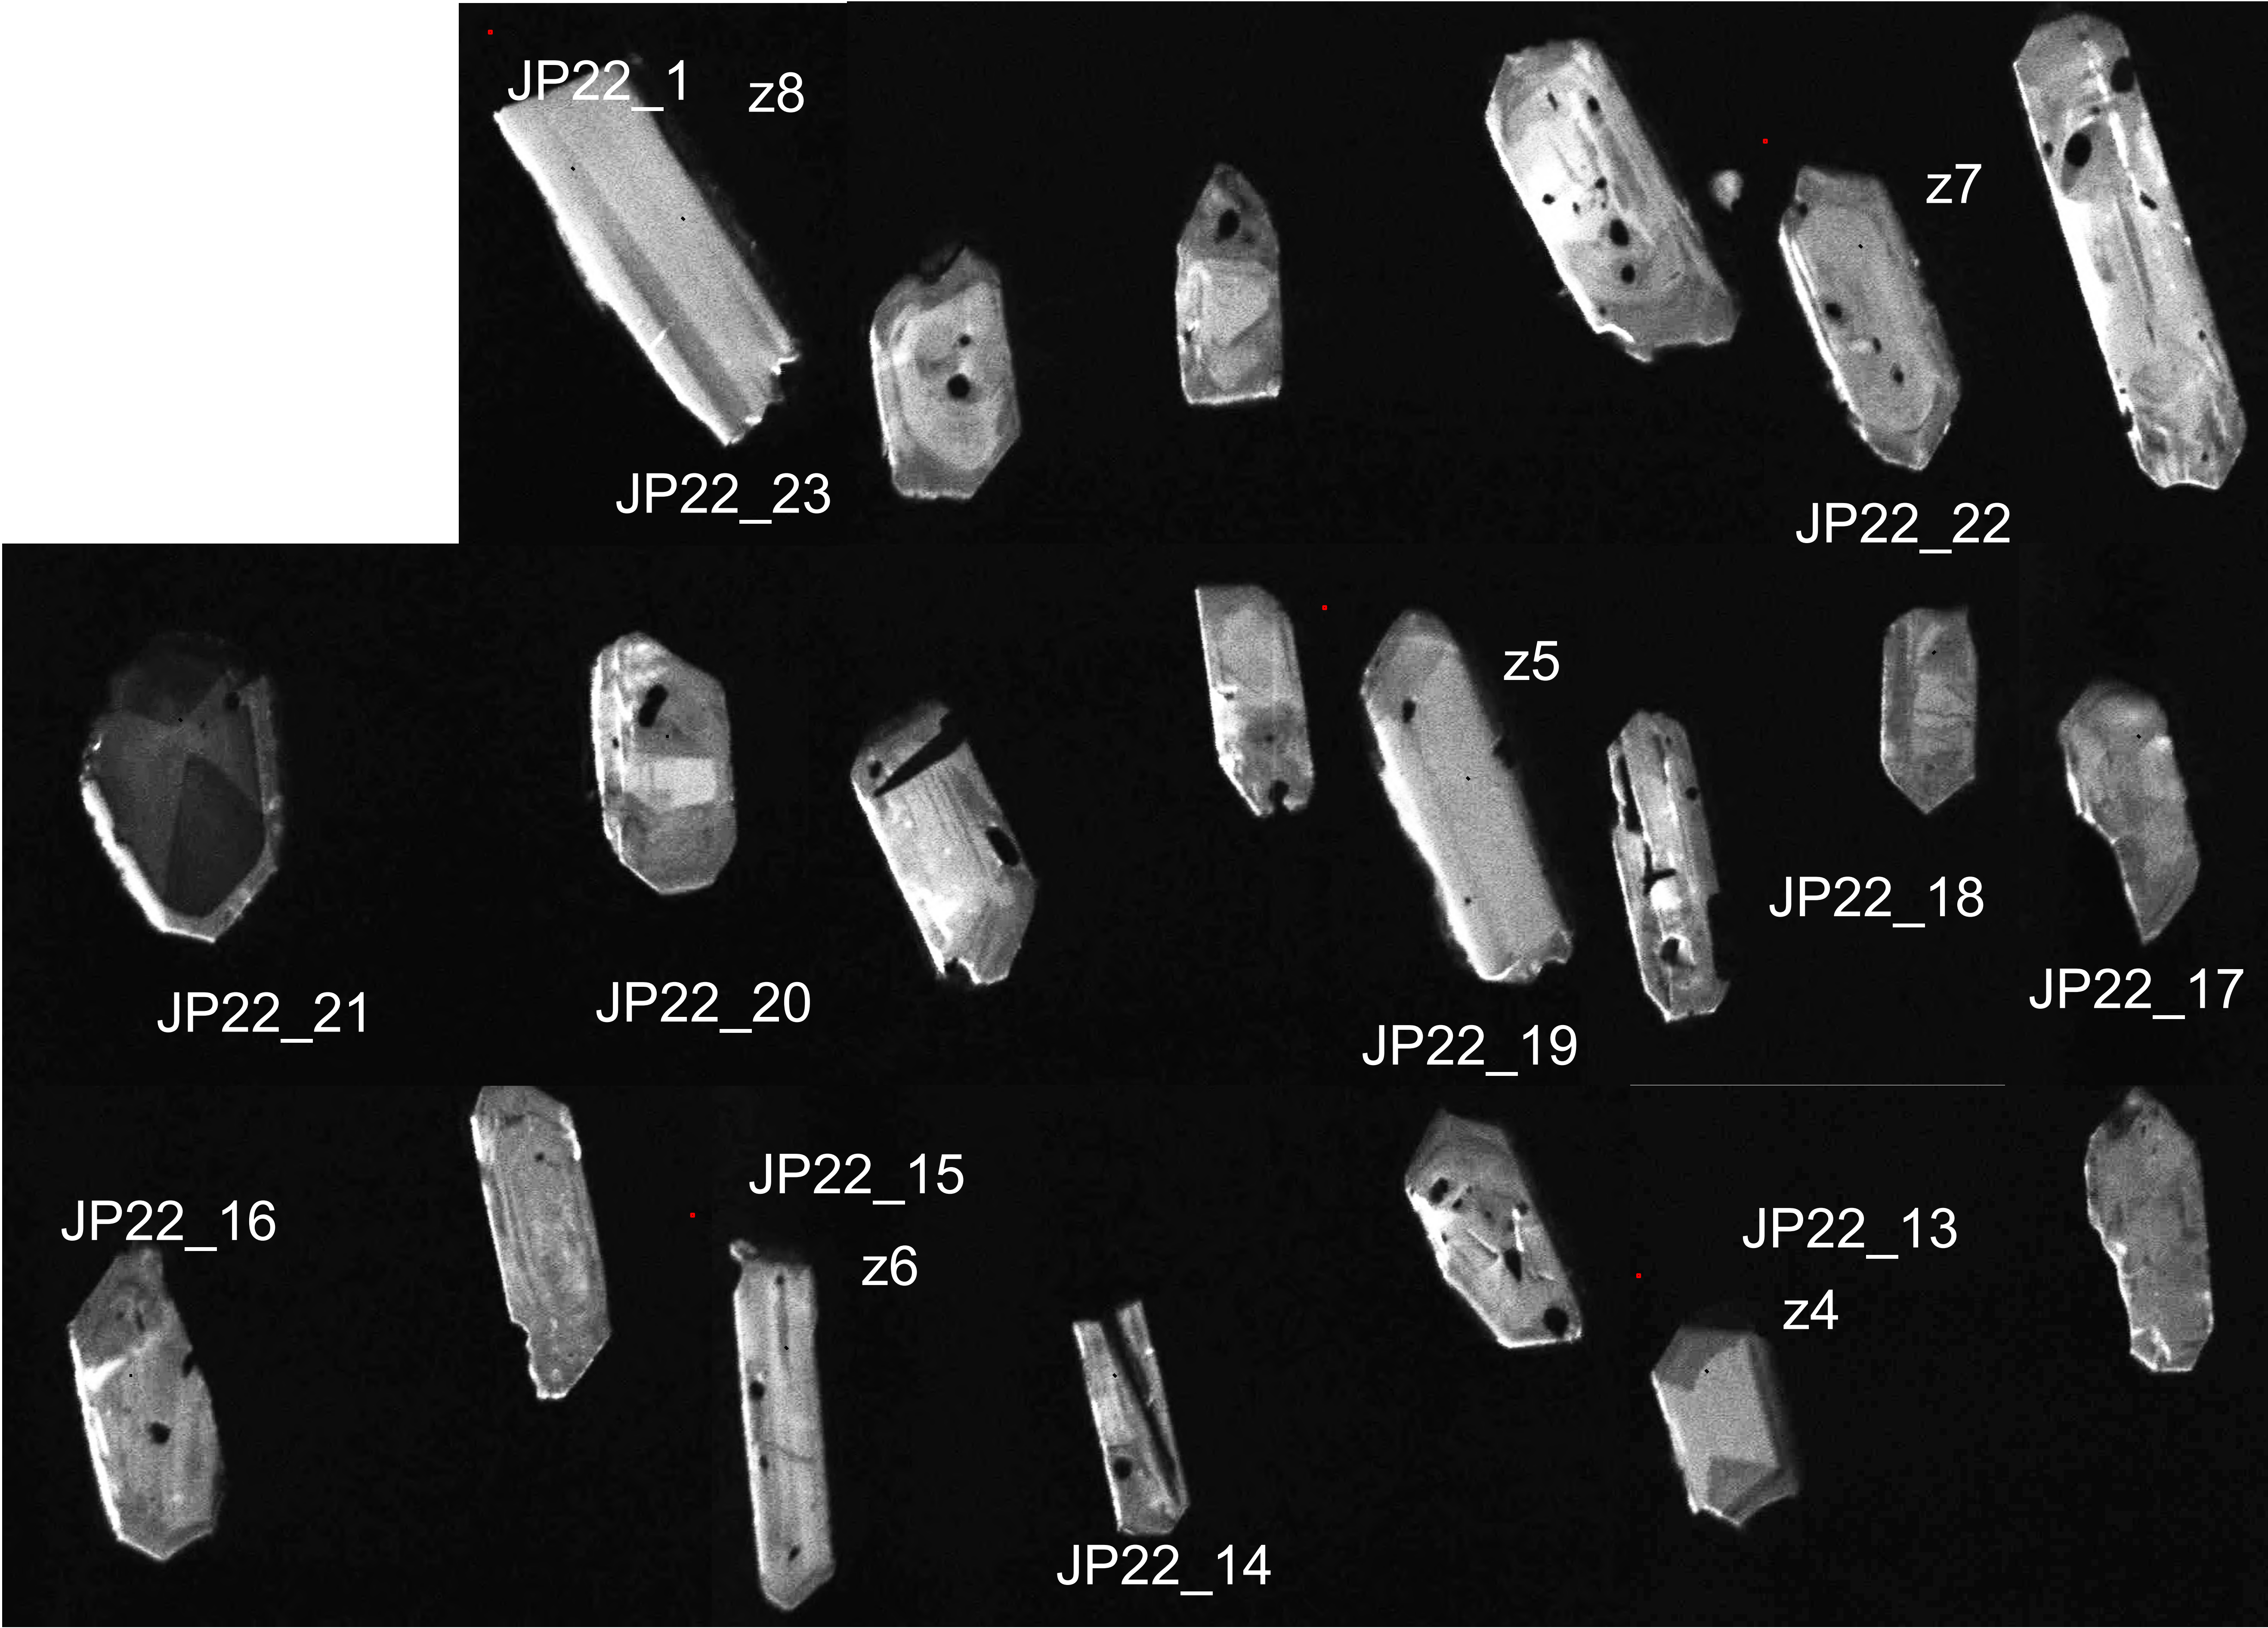



JP-22 (row 6)      200x      Feb.8/17

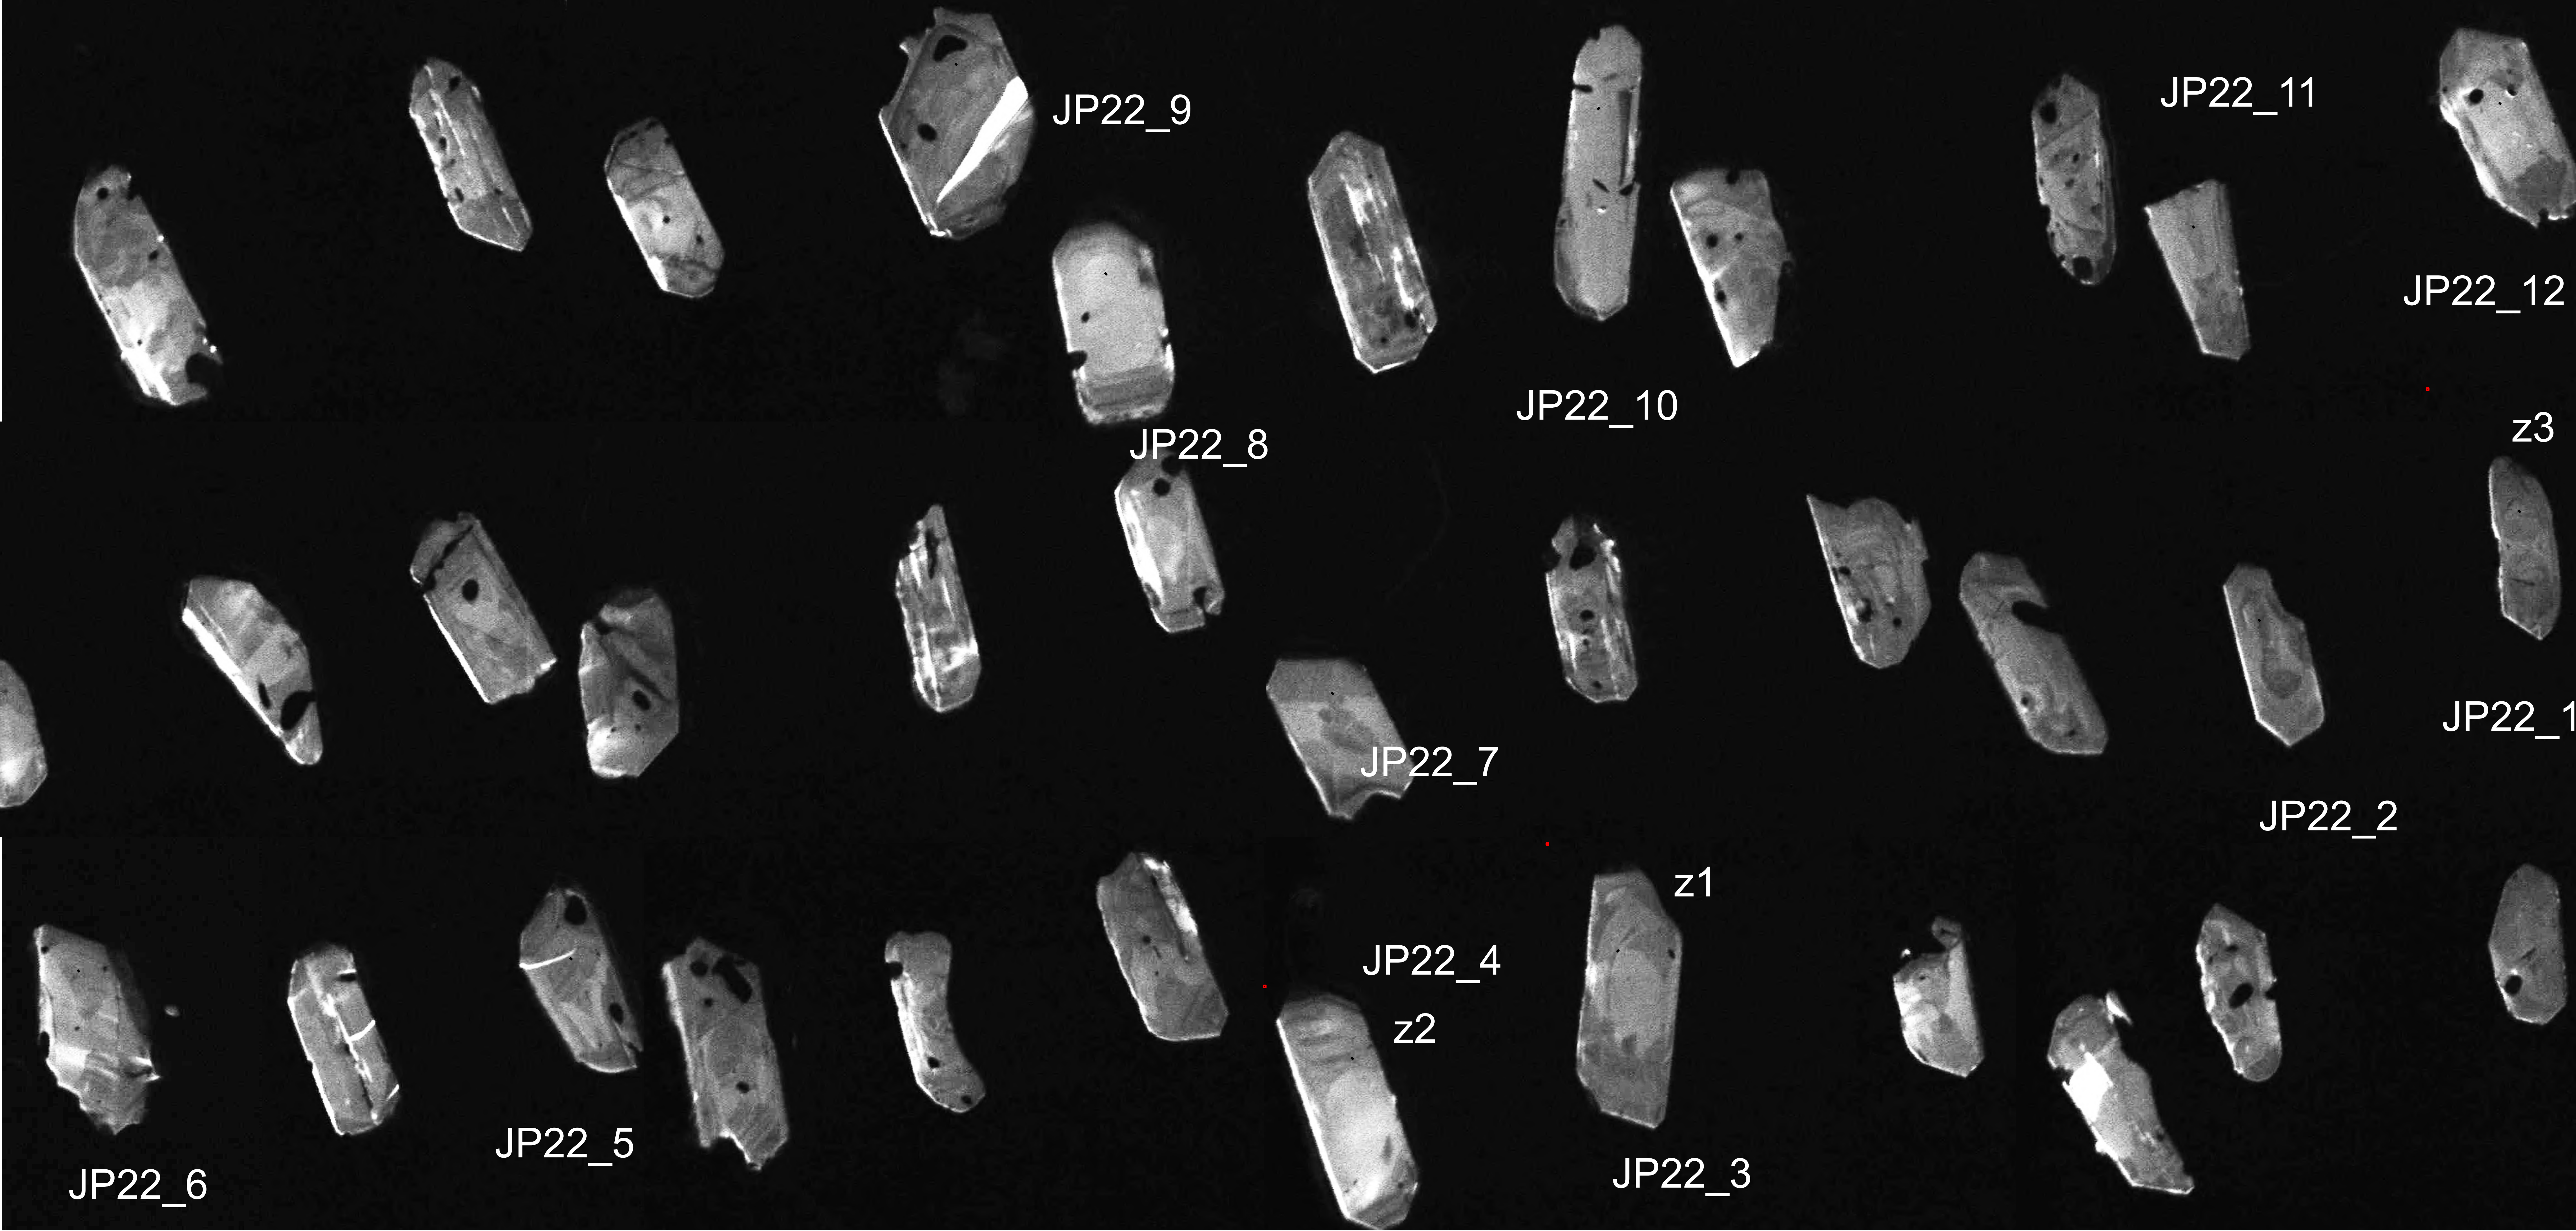



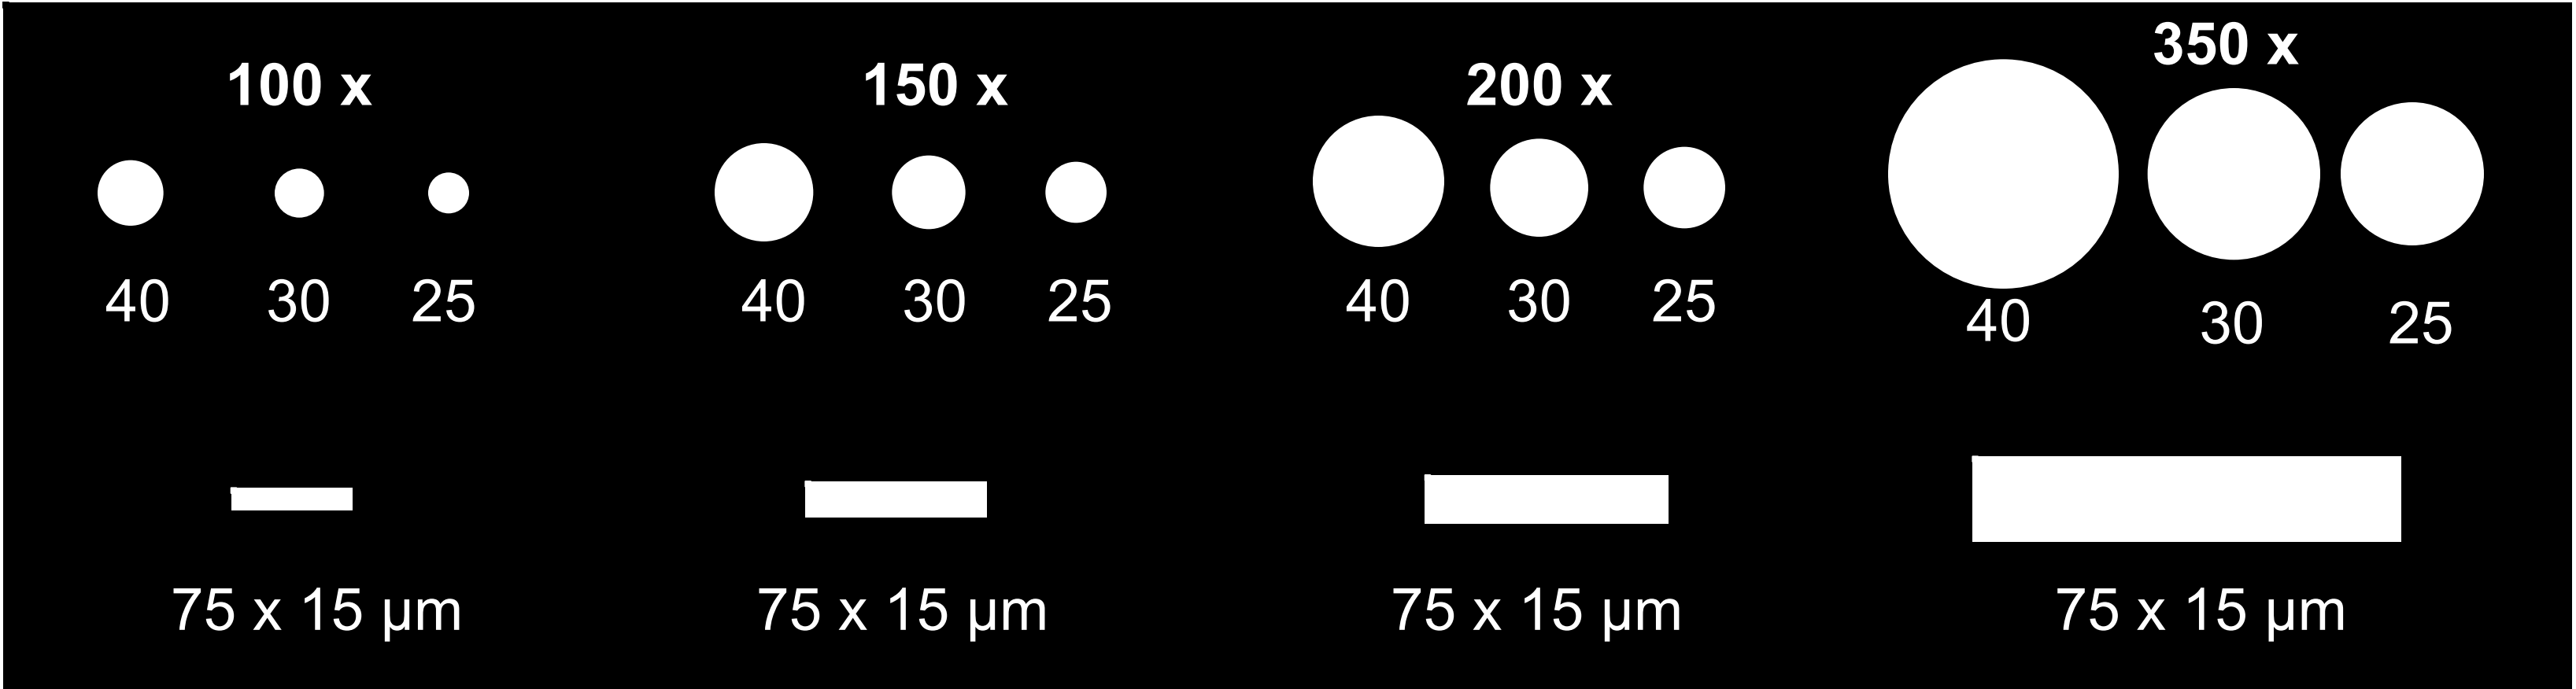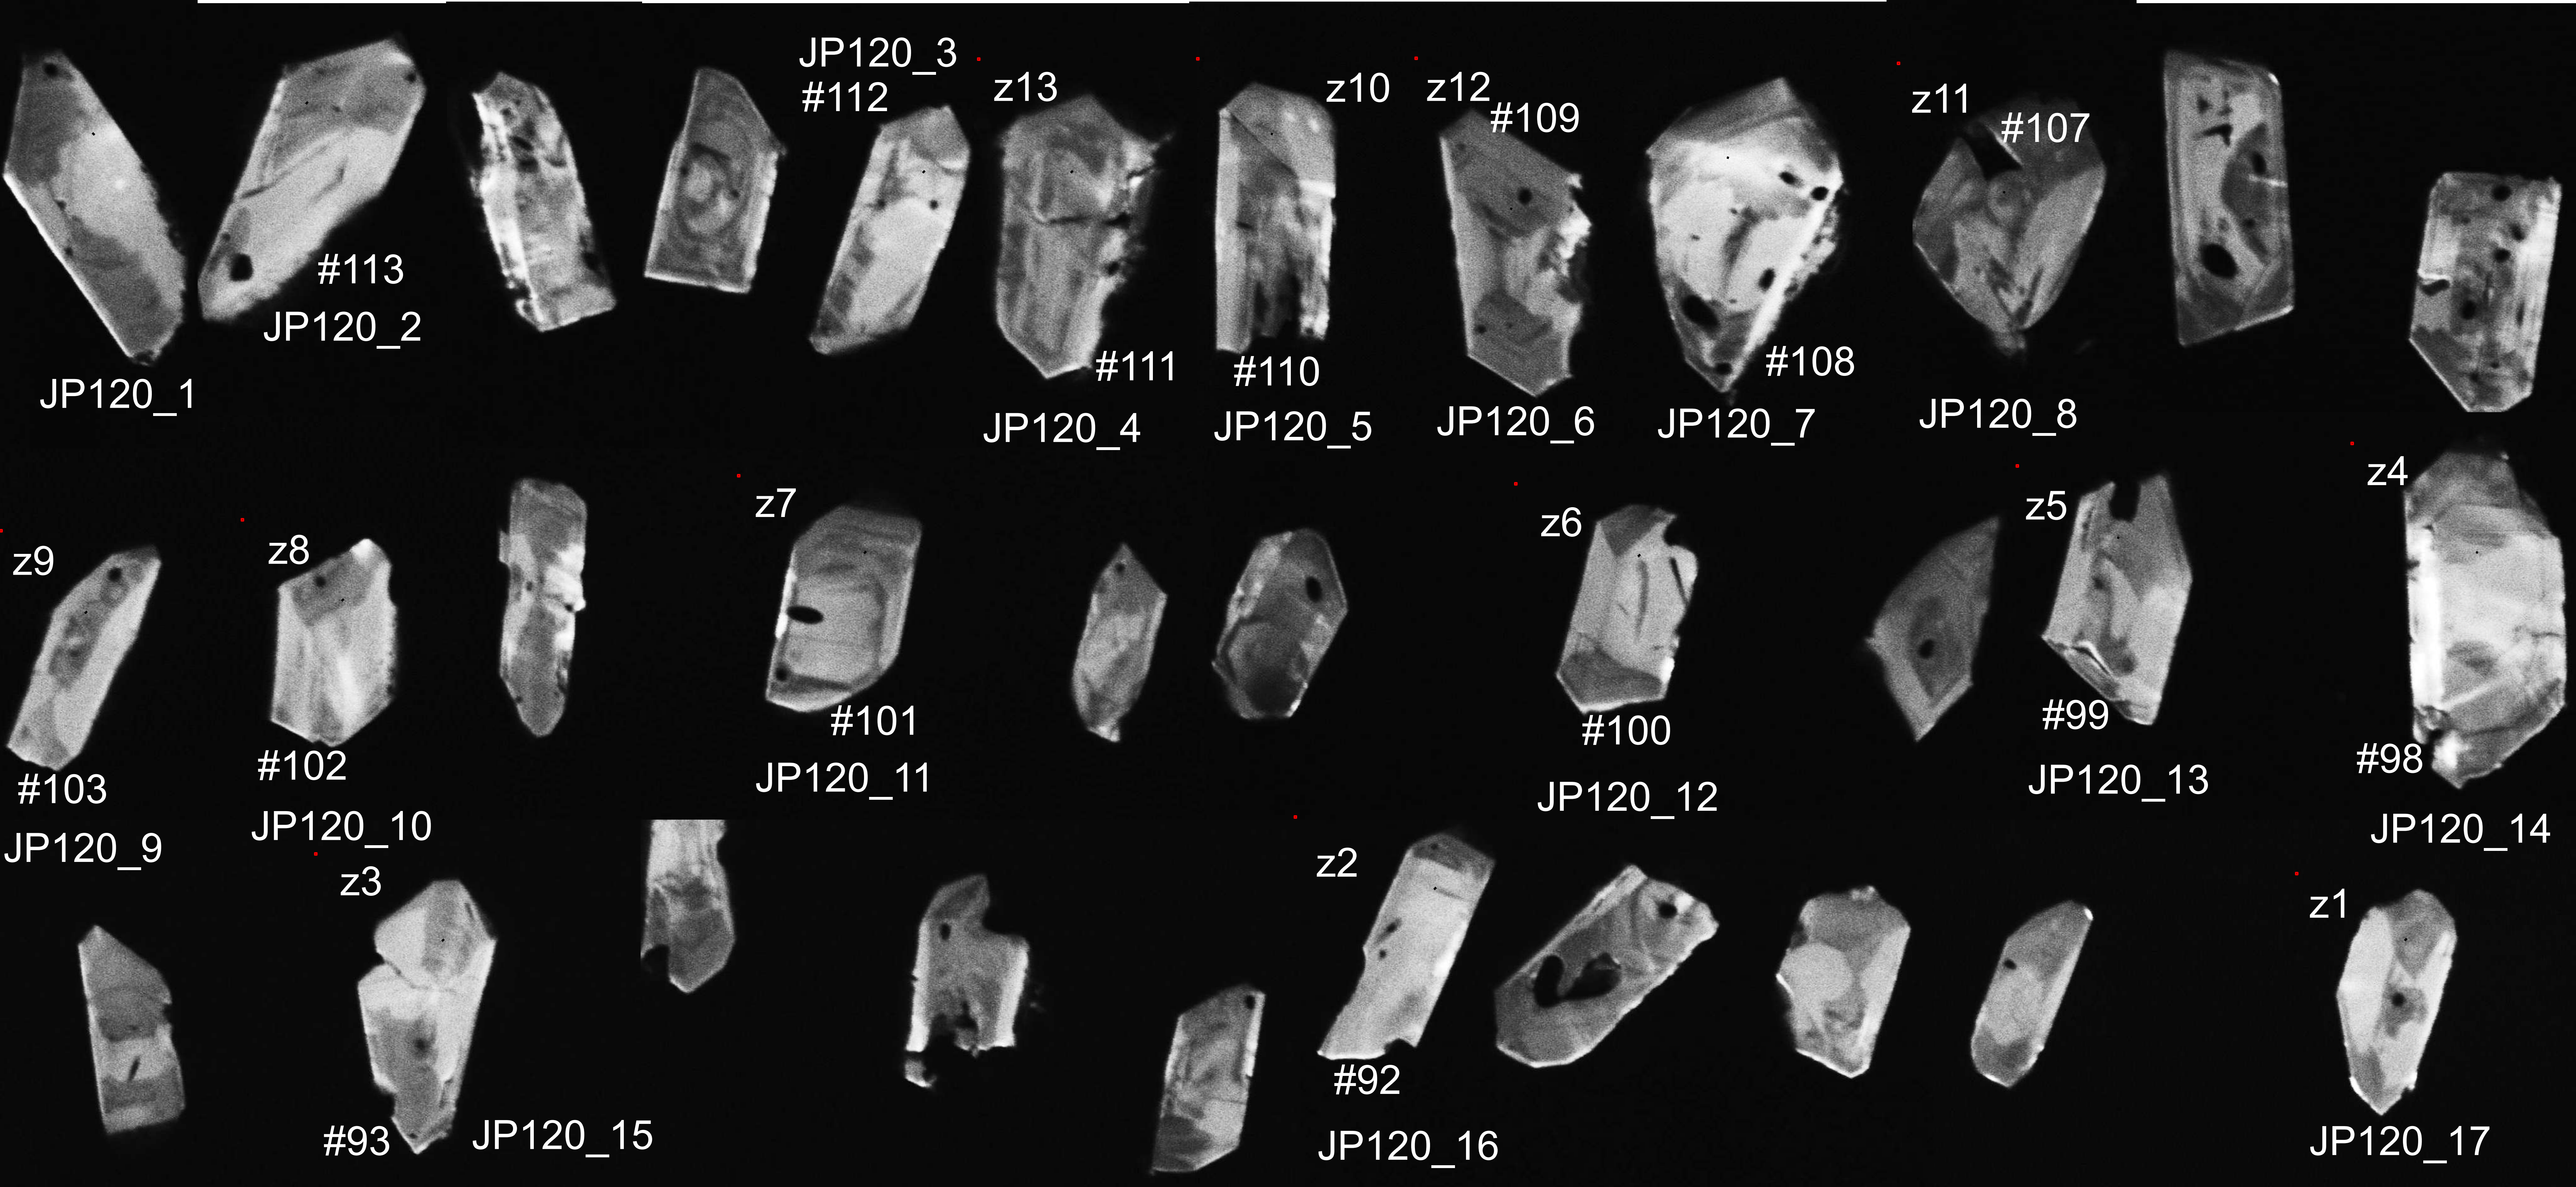



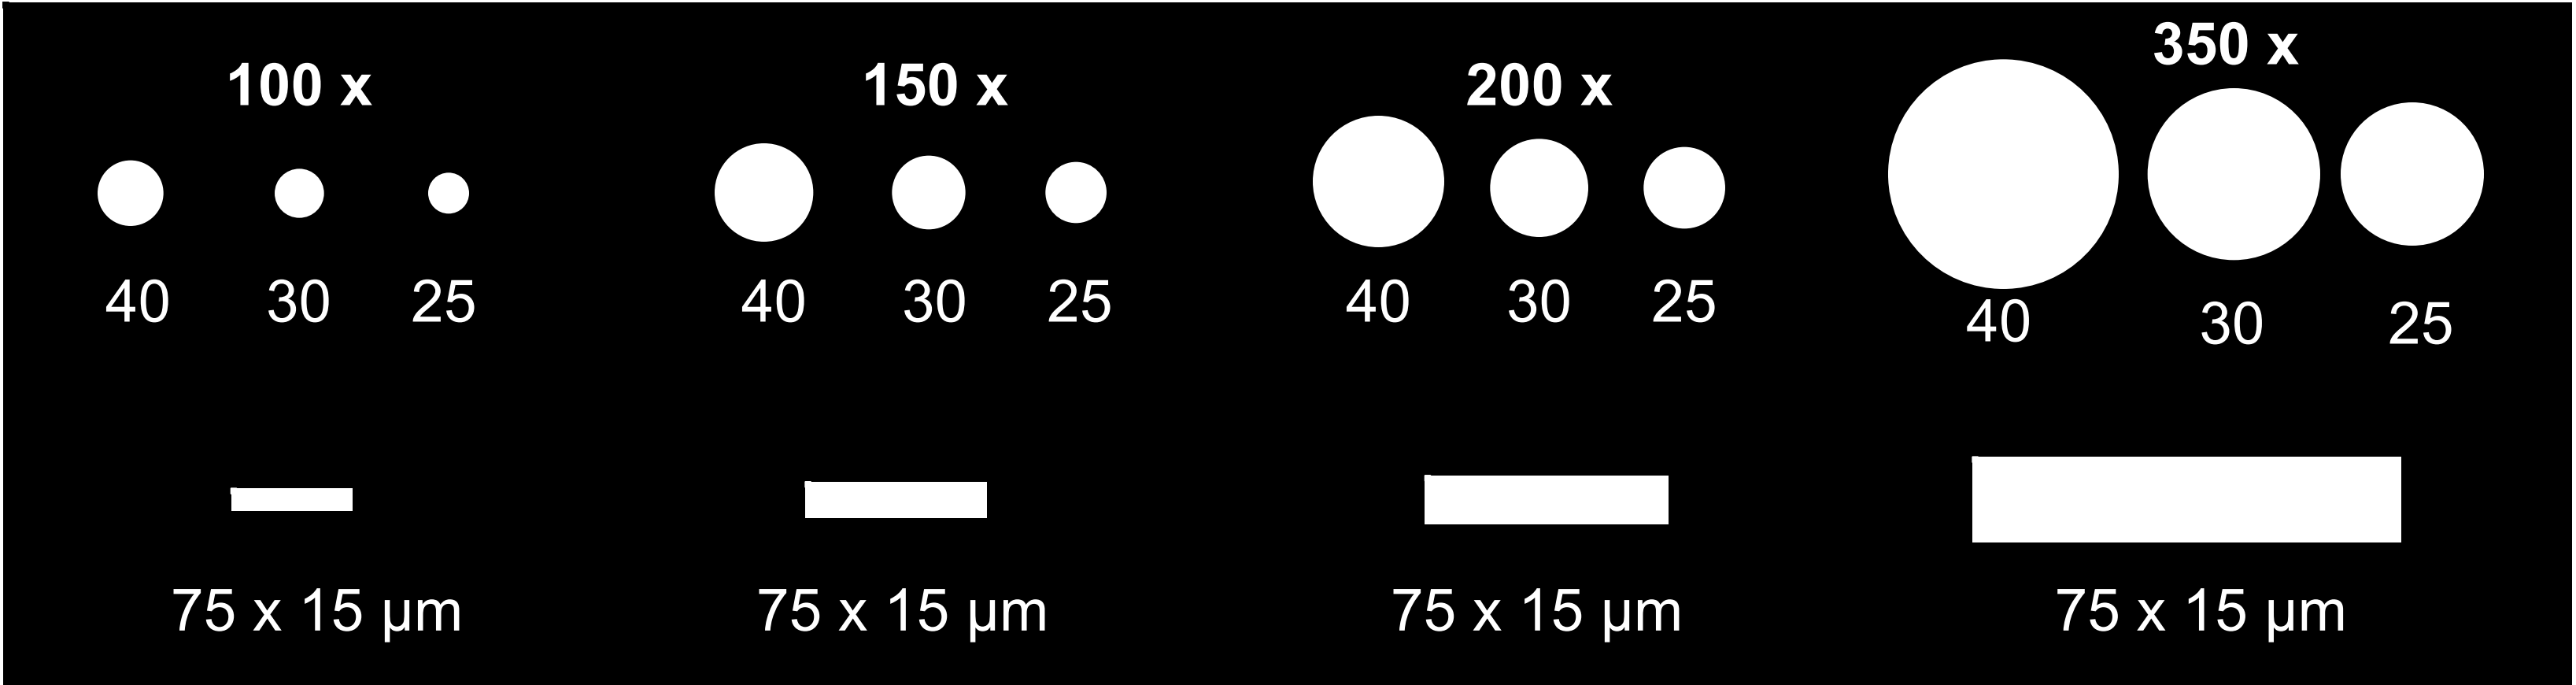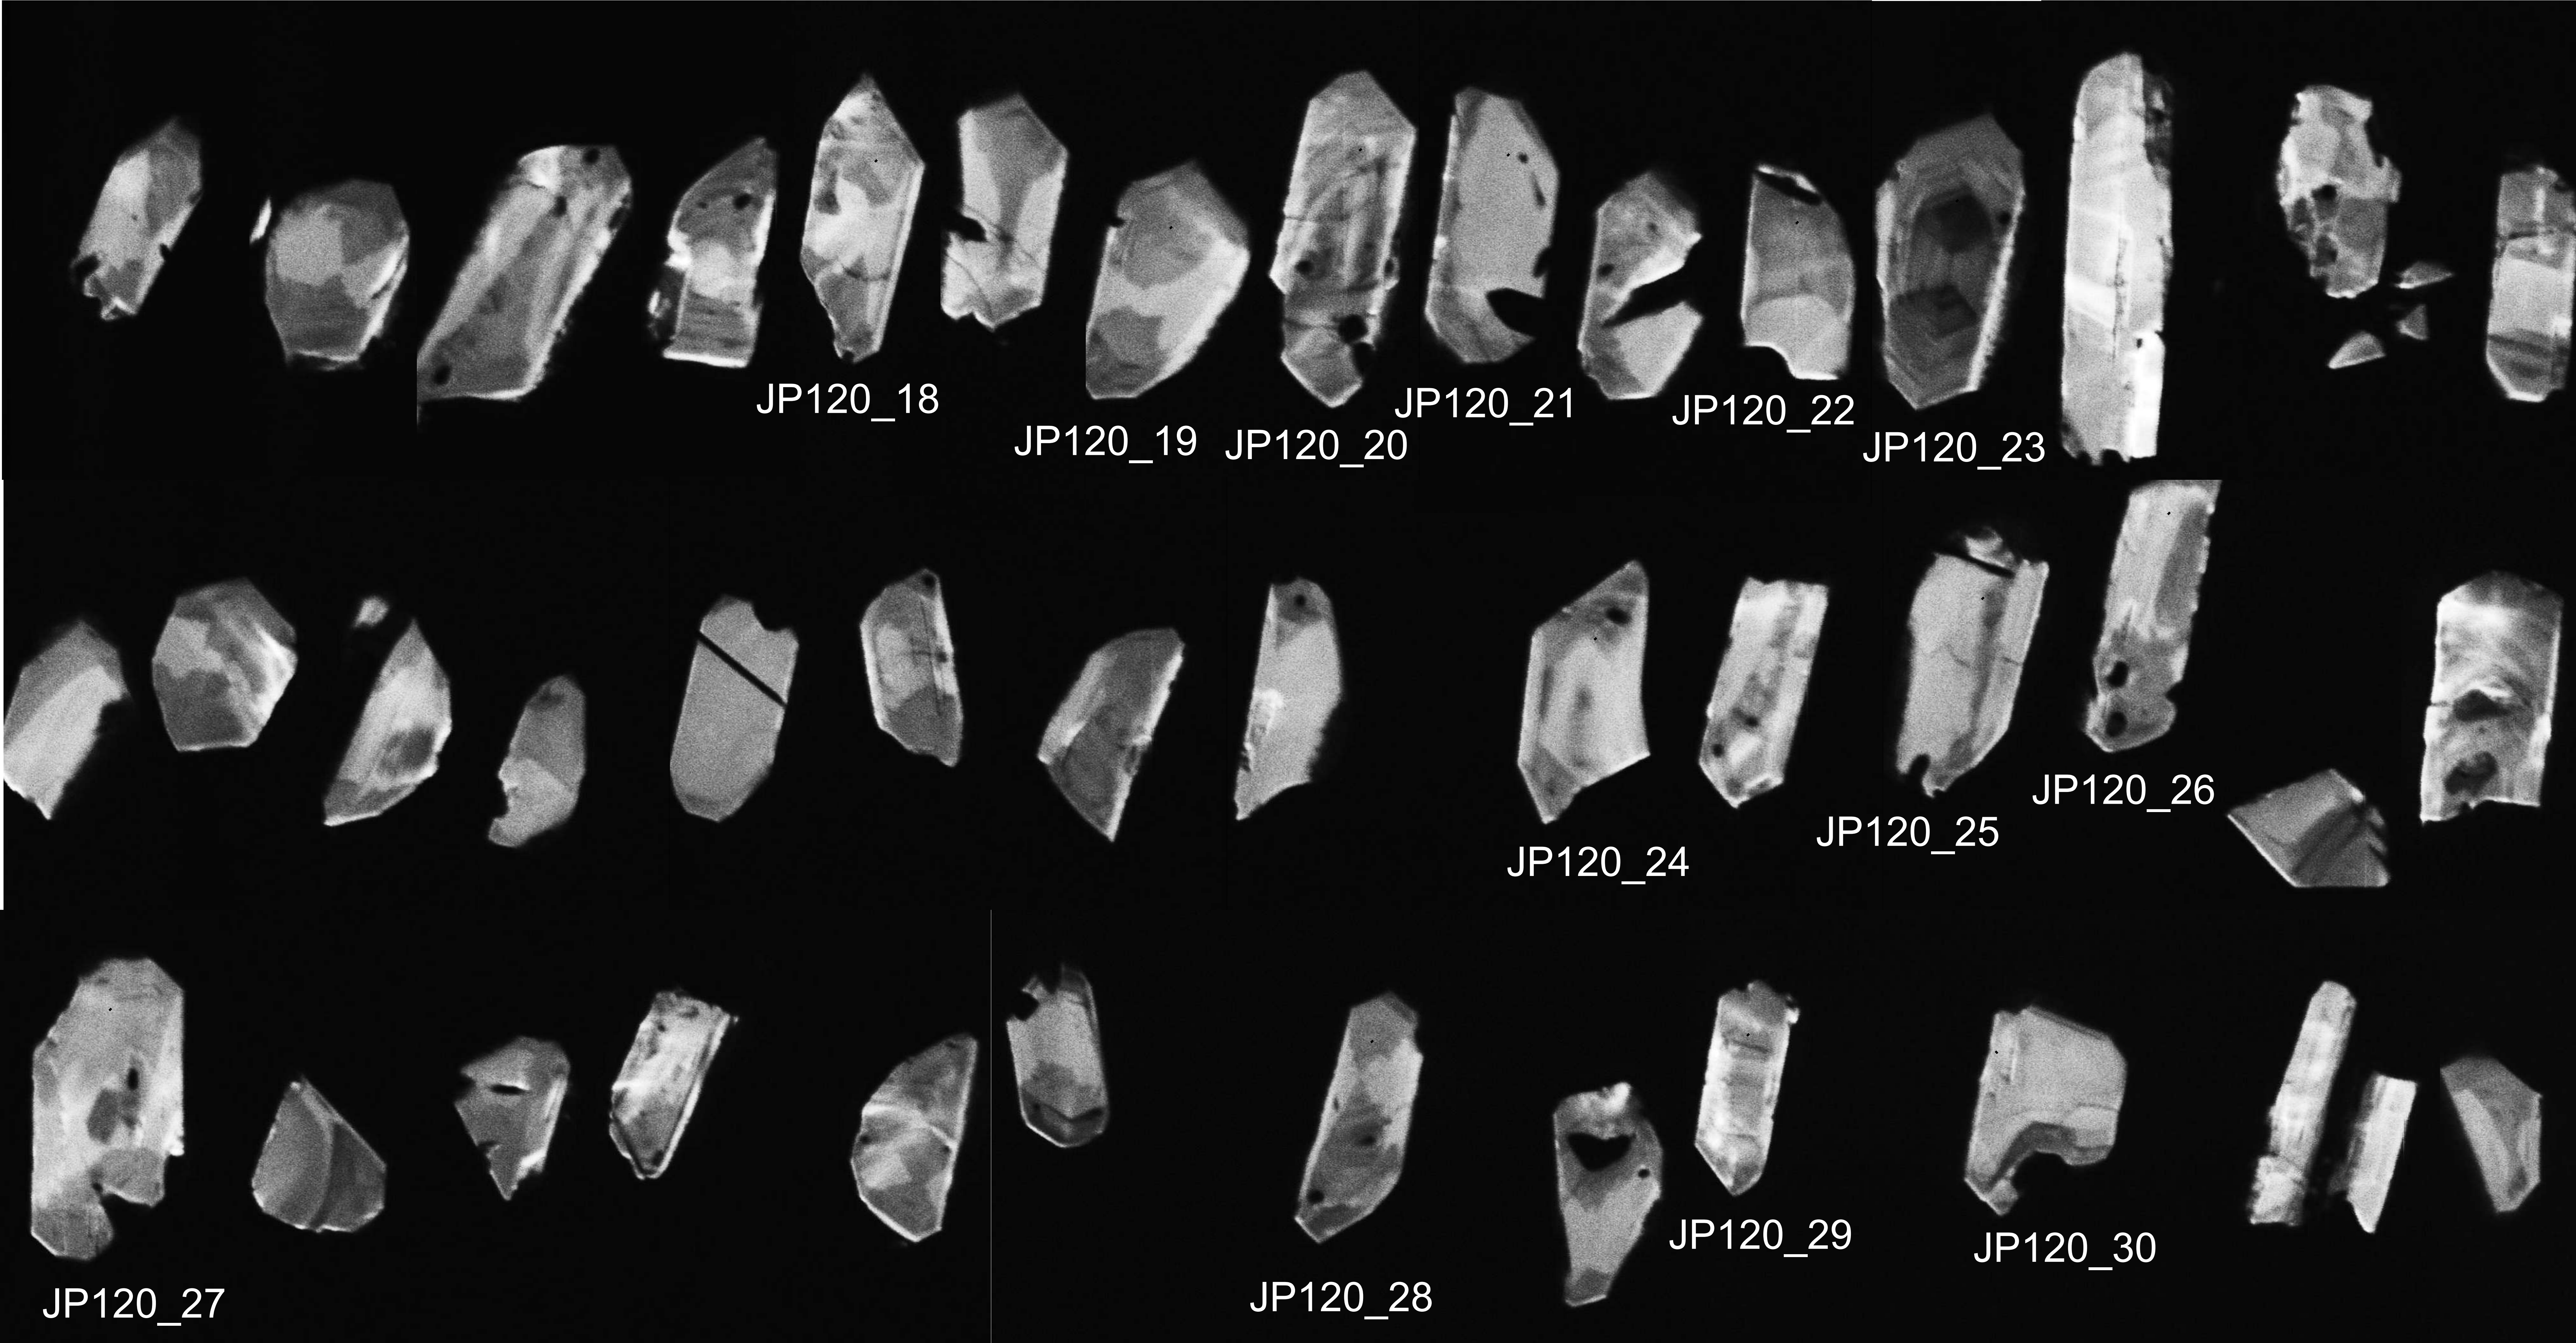



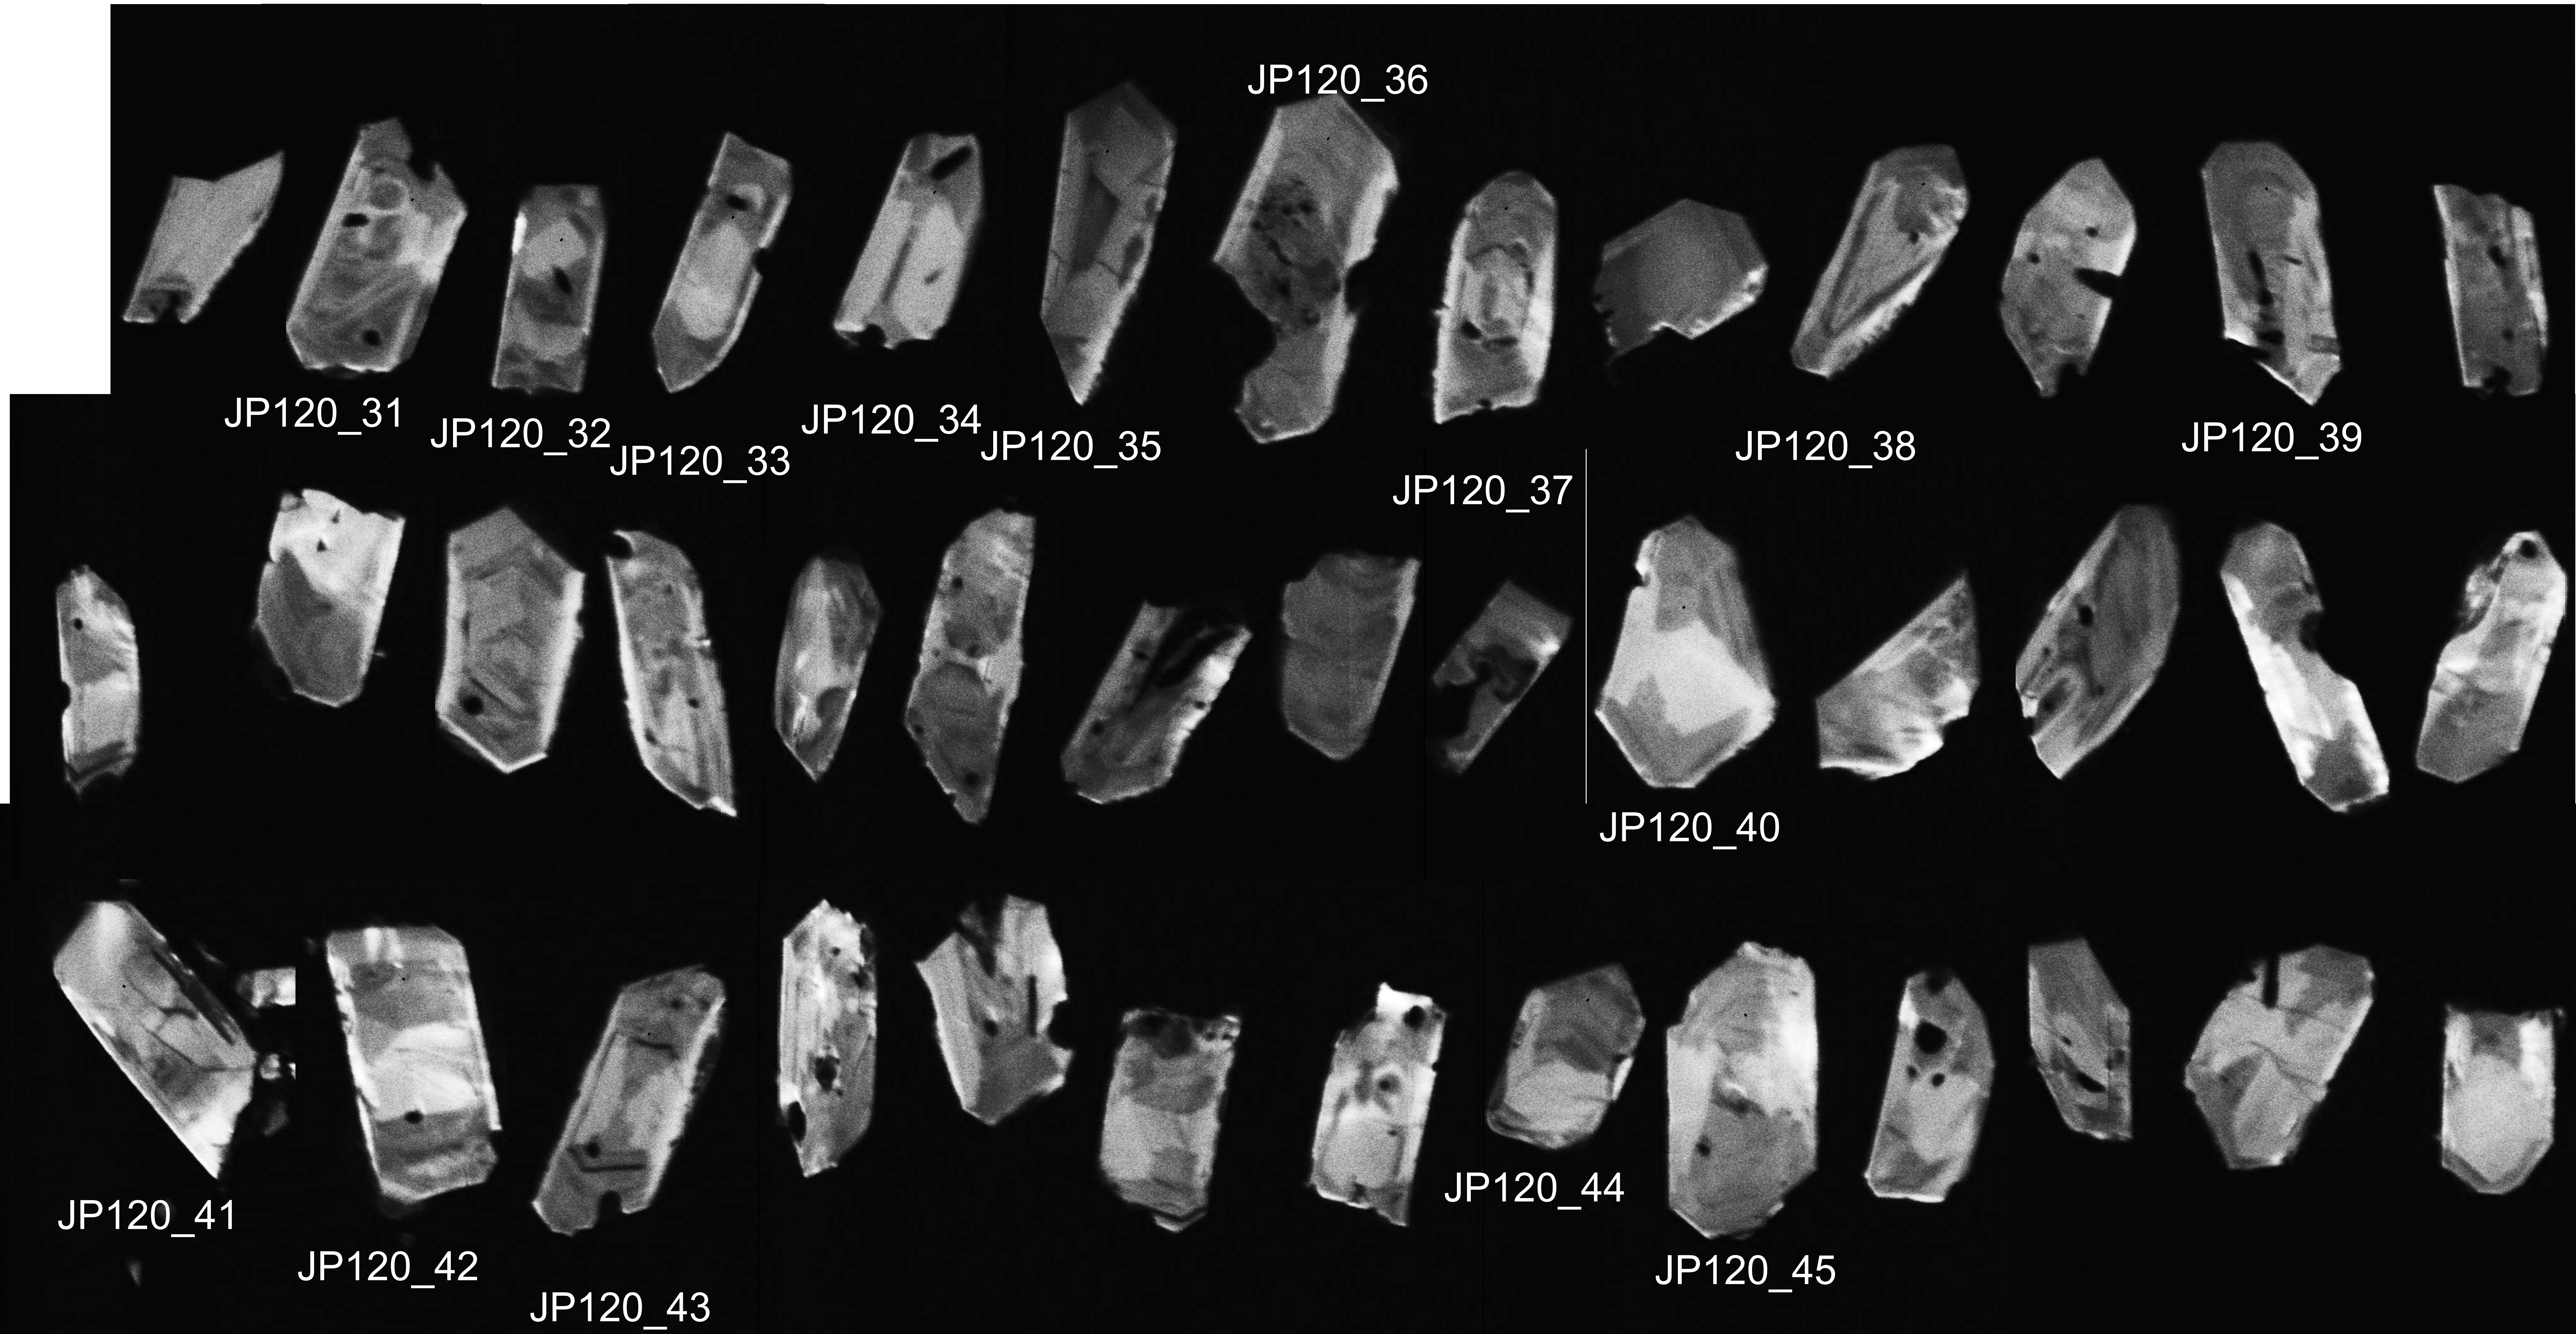



JP-120 (row 4)      350x      05/12/2017

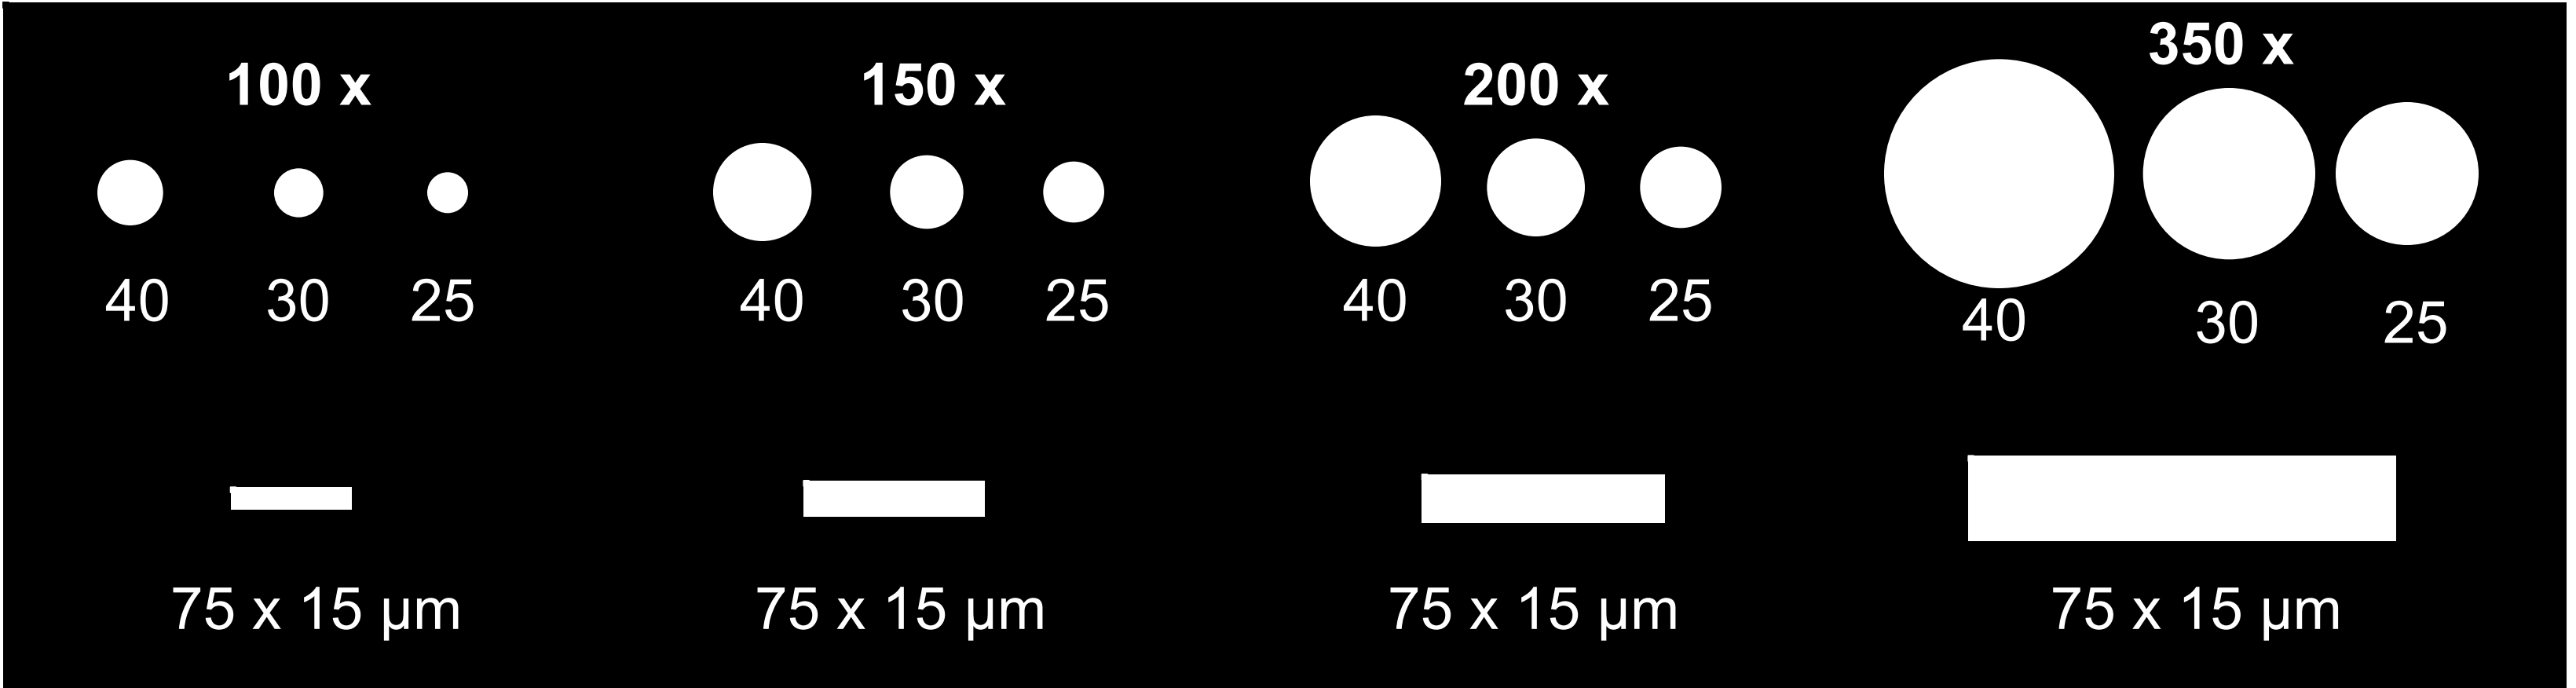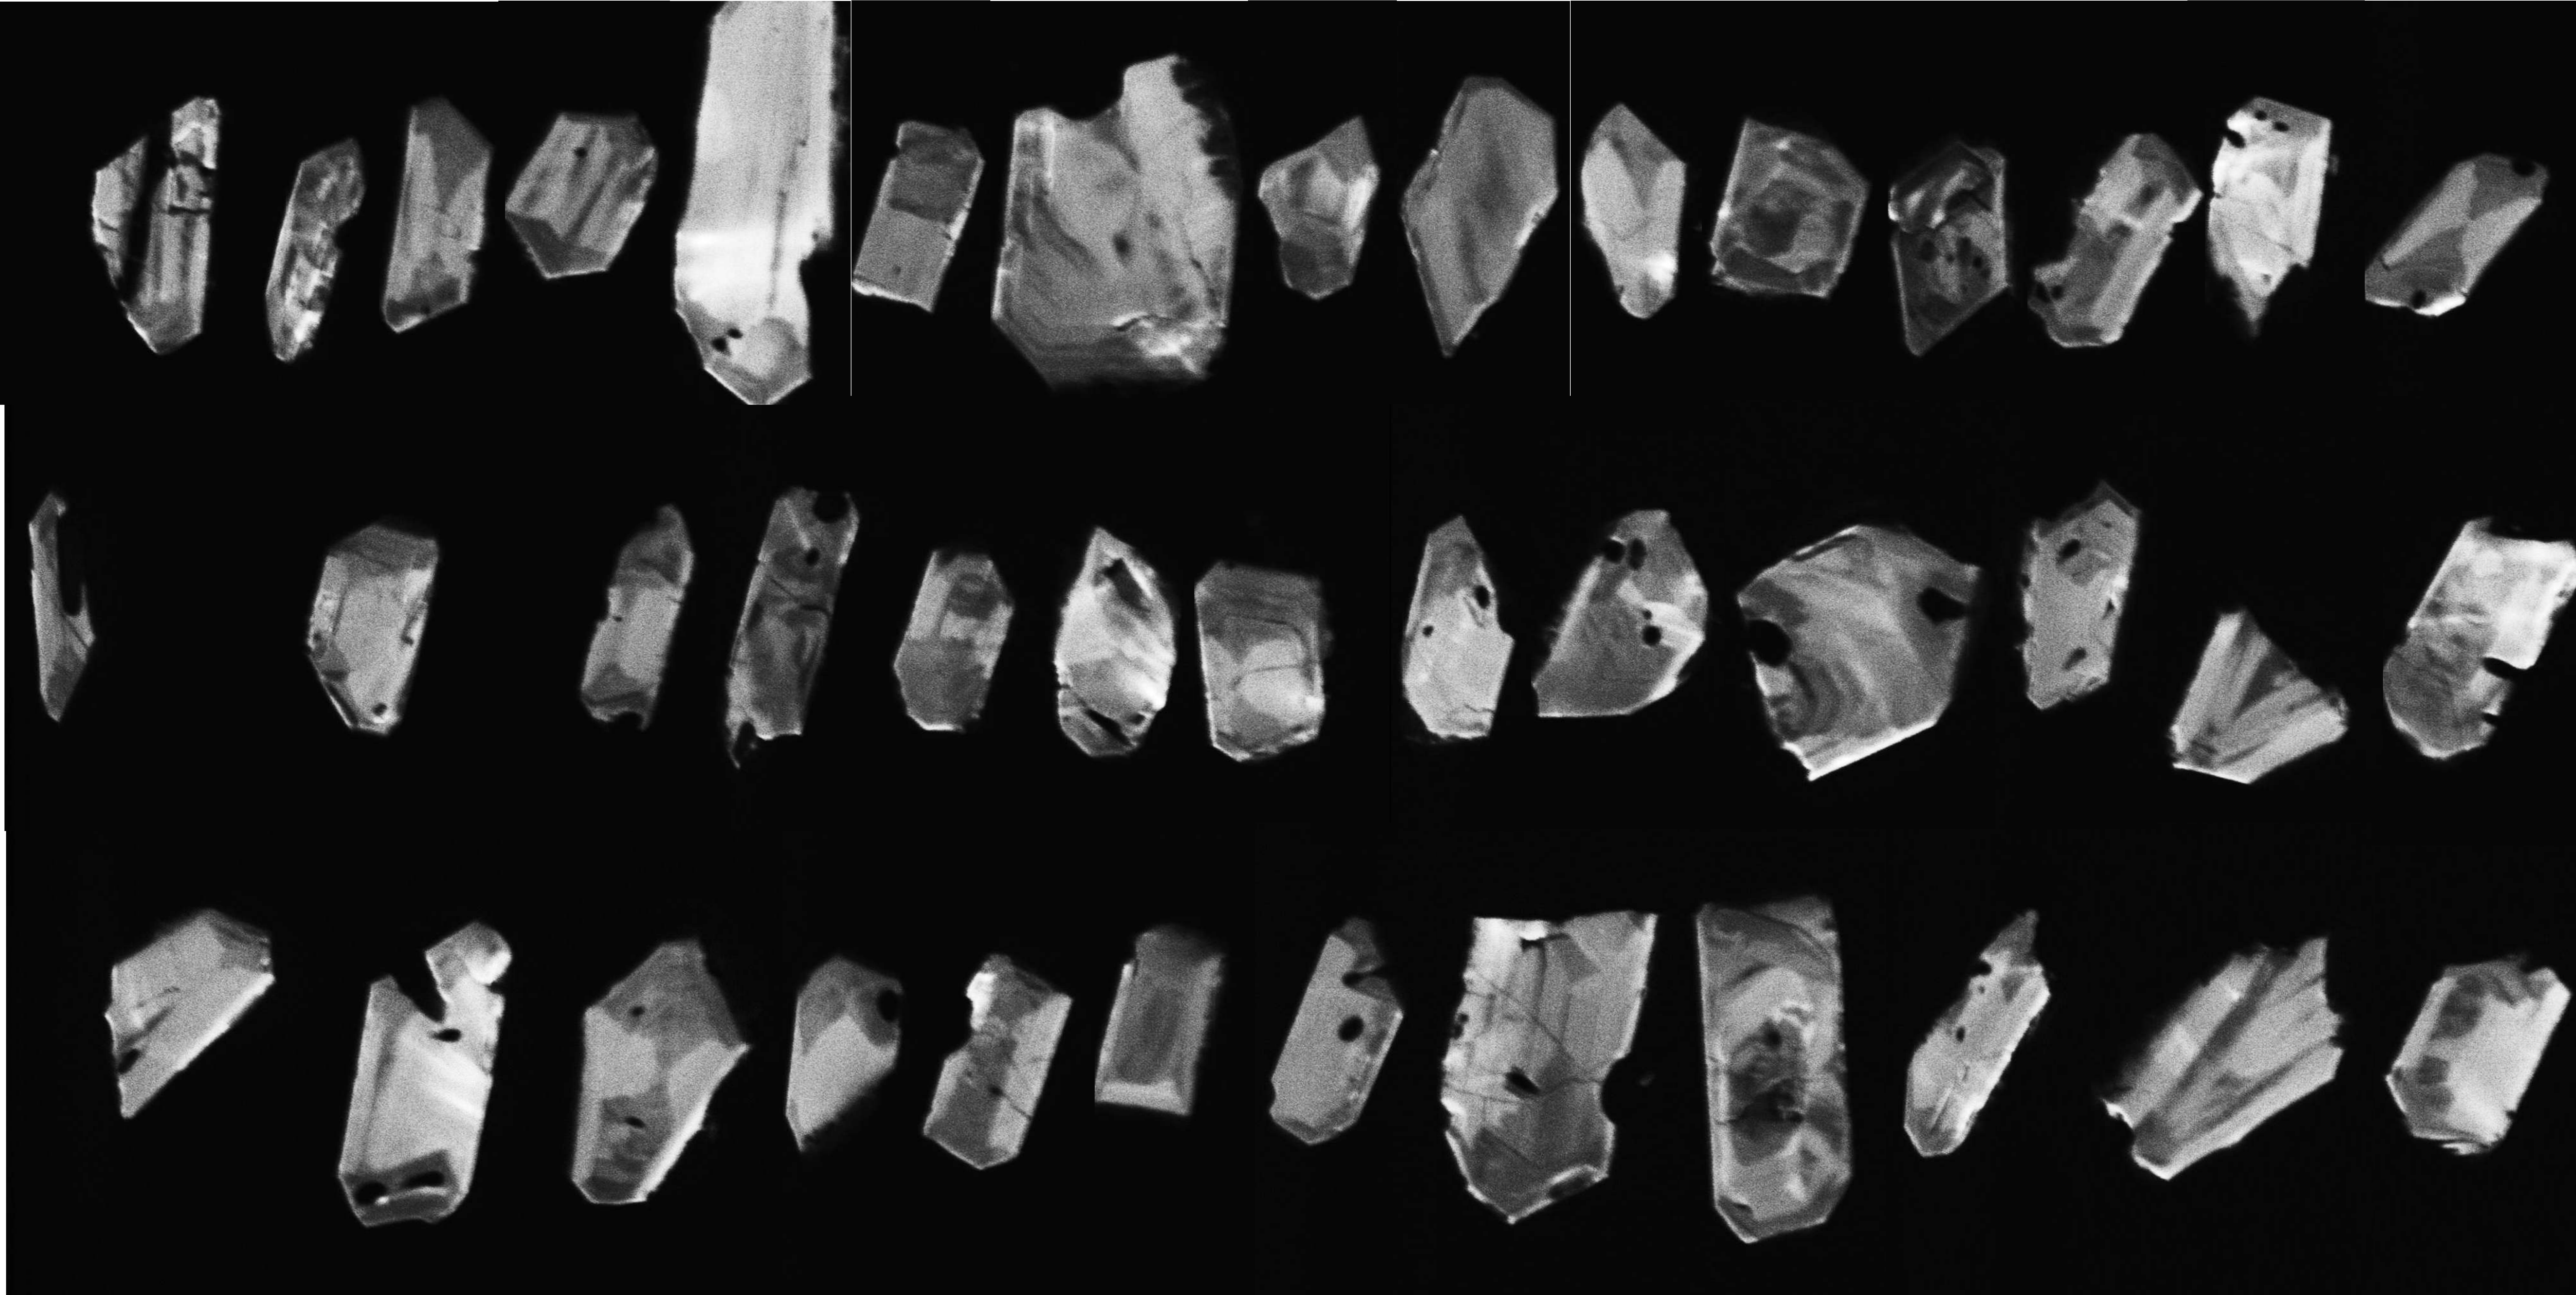



WP16-2 (row 1) 150x

01/27/2017

100 x

40

30

25

150 x

40

30

25

200 x

40

30

25

350 x

40

30

25

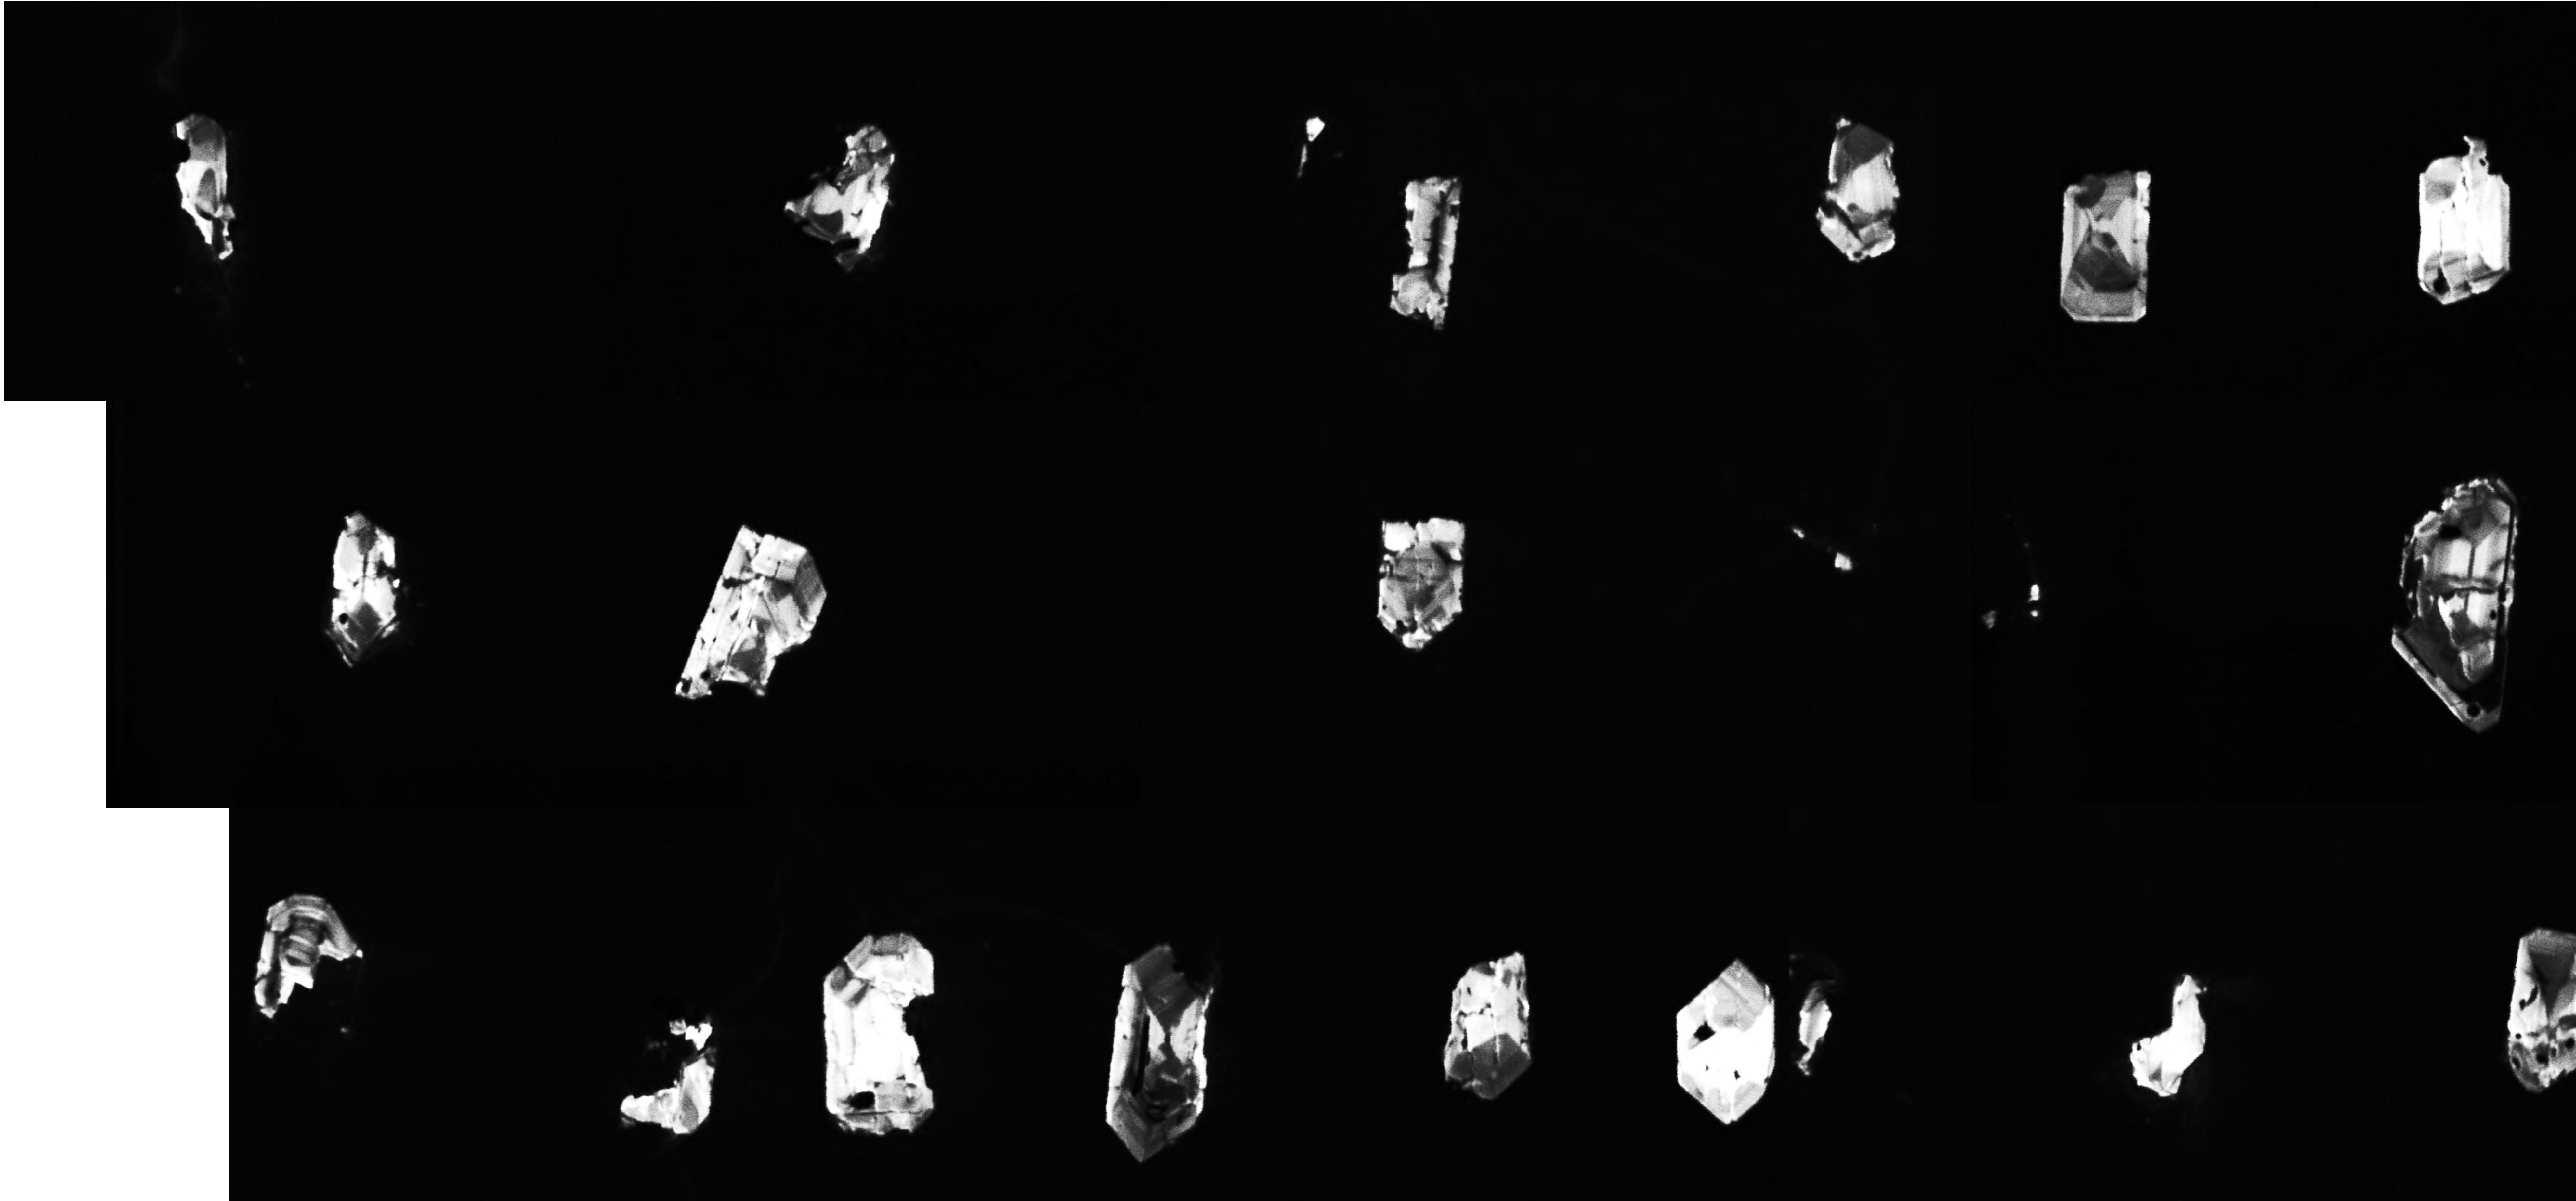



WP16-2 (row 2) 150x

01/27/2017

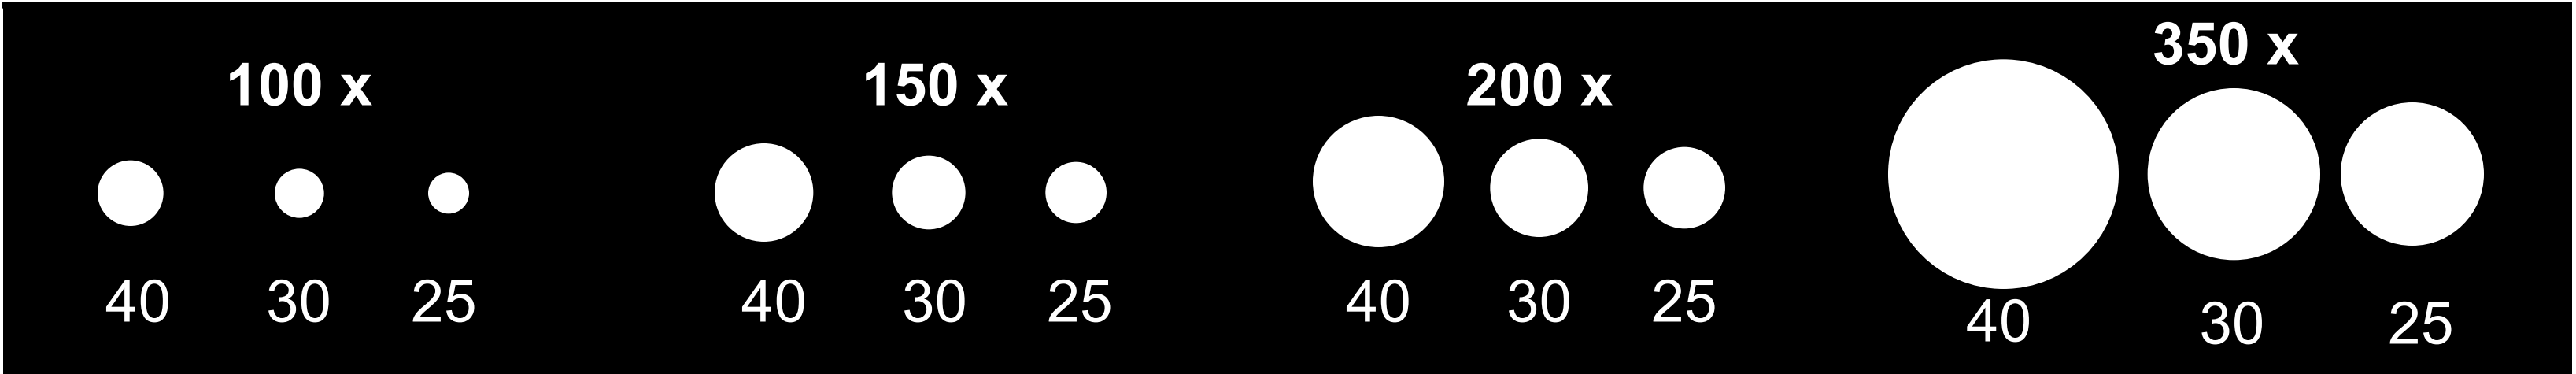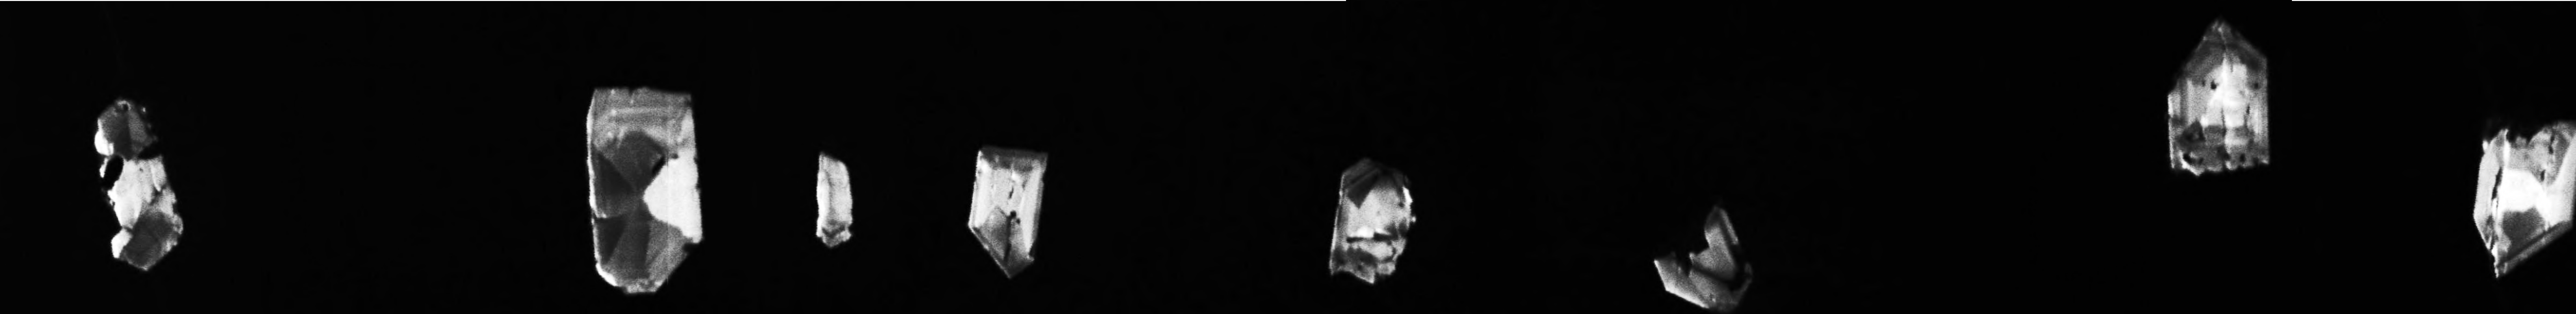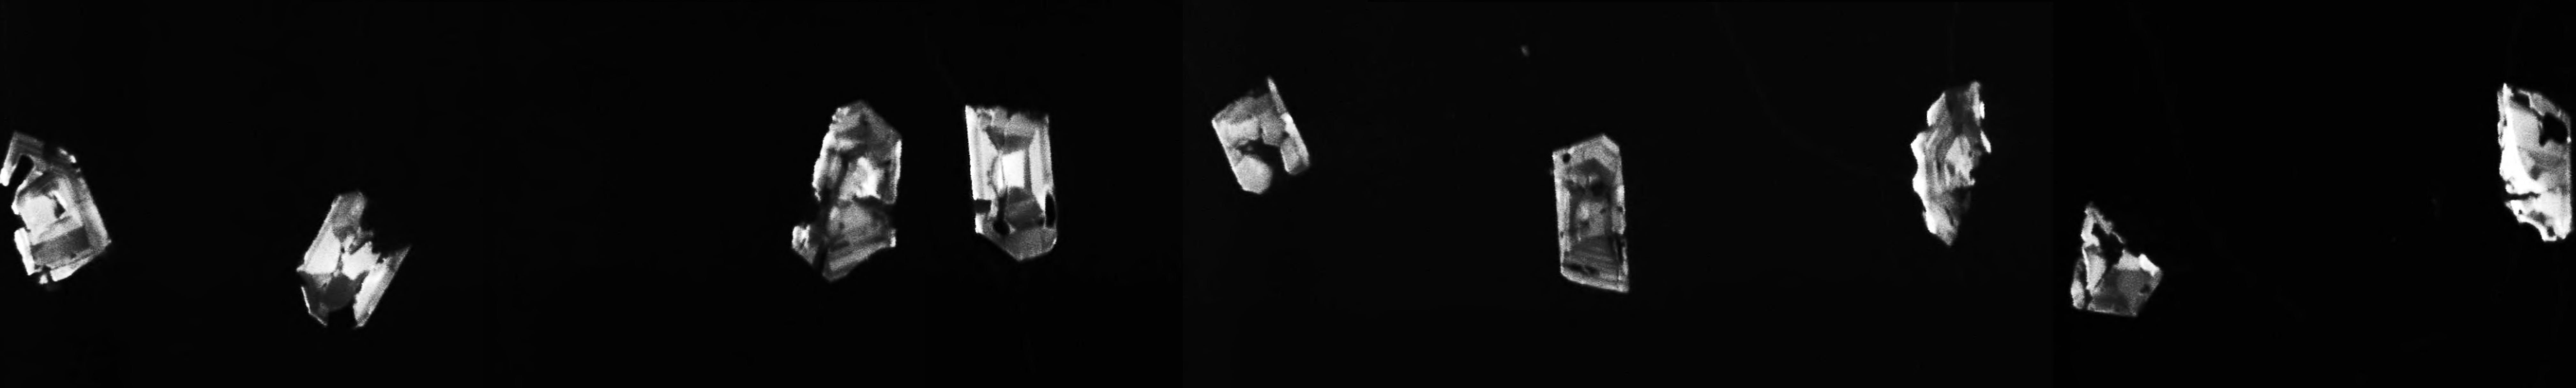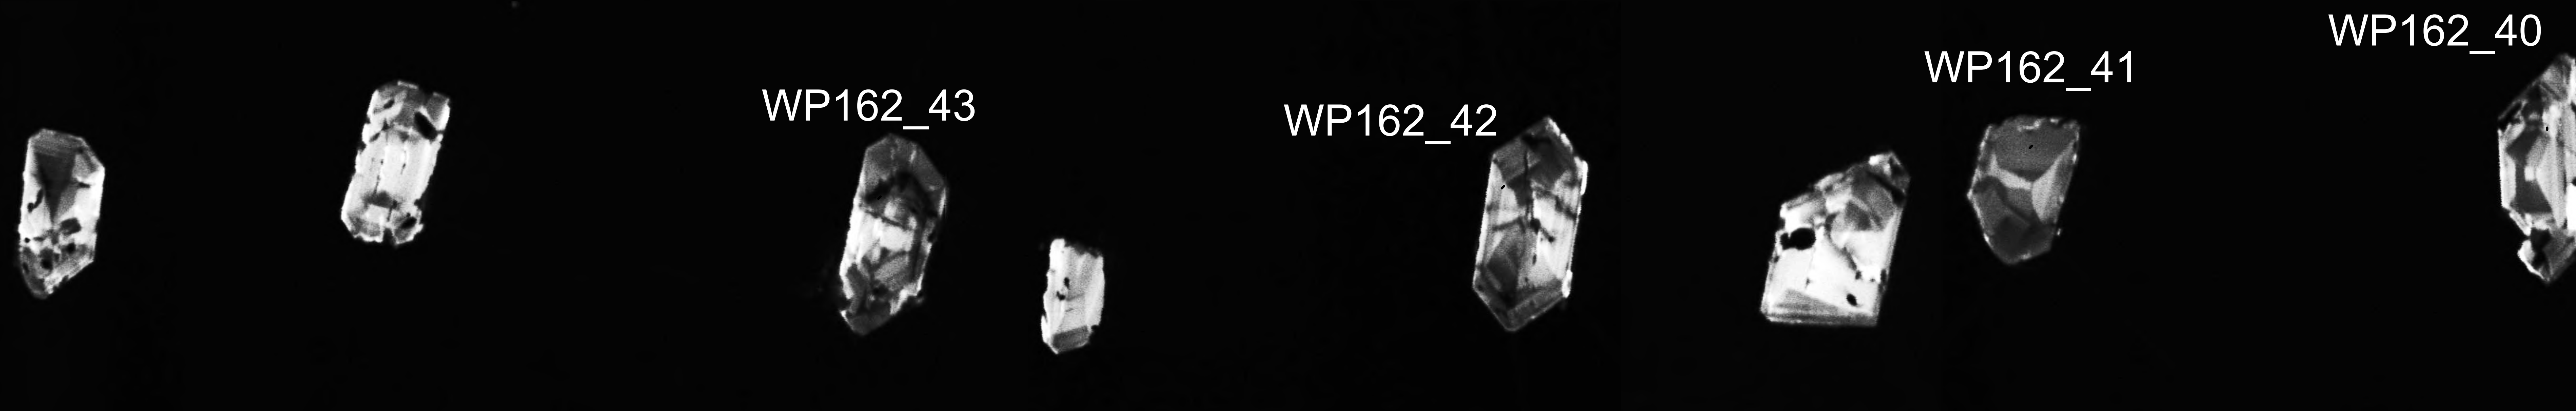



WP16-2 (row 3) 150x

01/27/2017

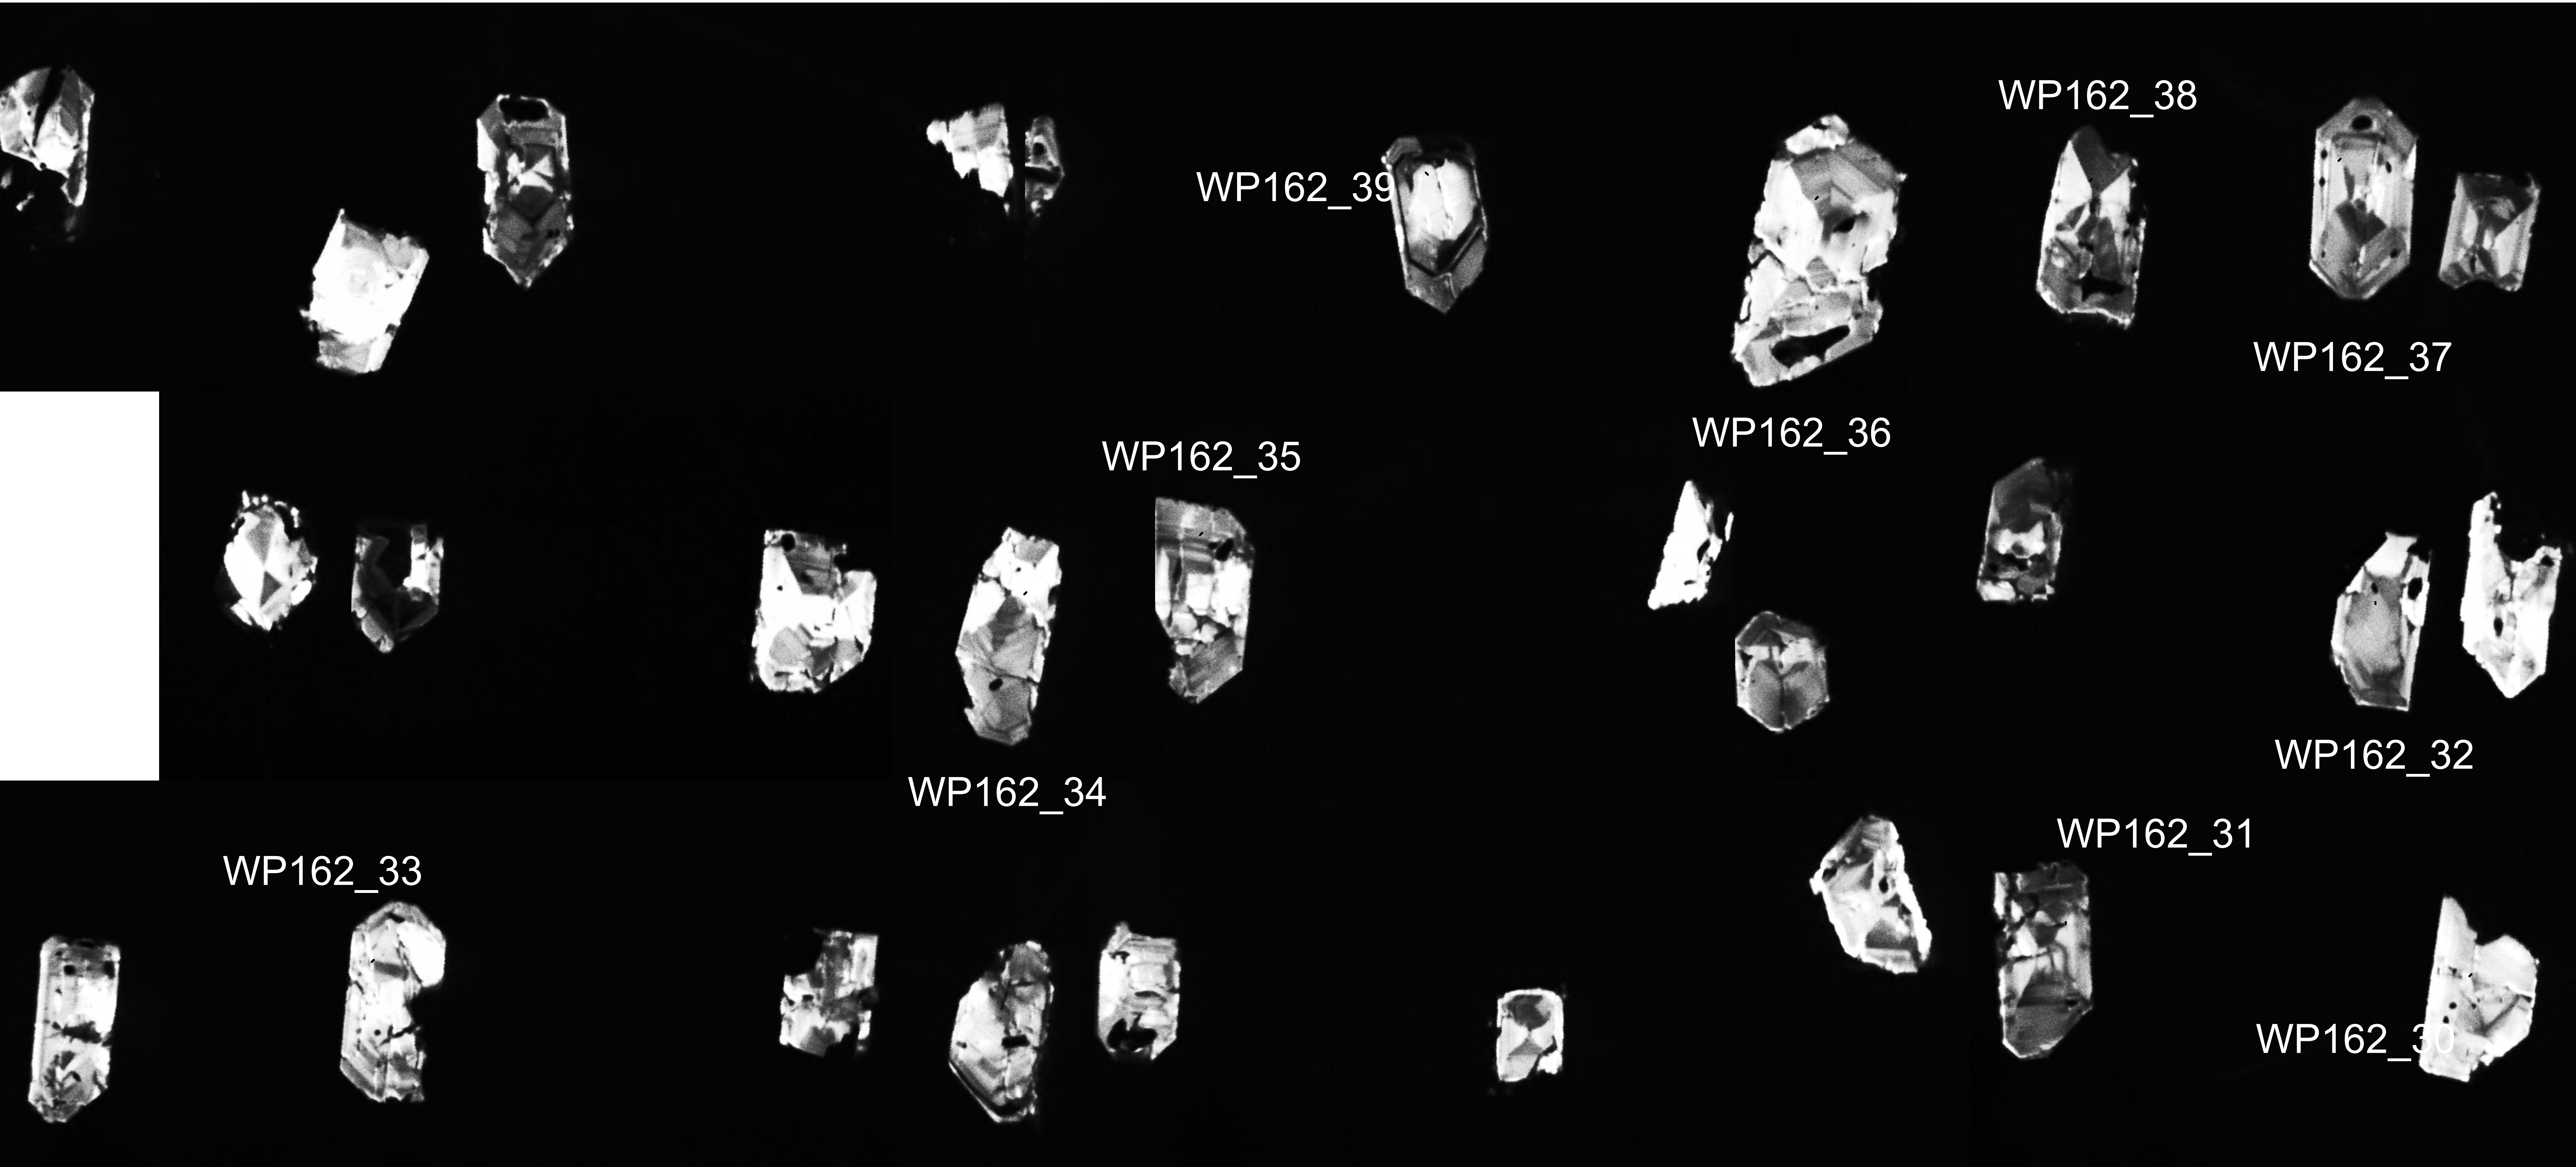



WP16-2 (row 4) 150x

01/27/2017

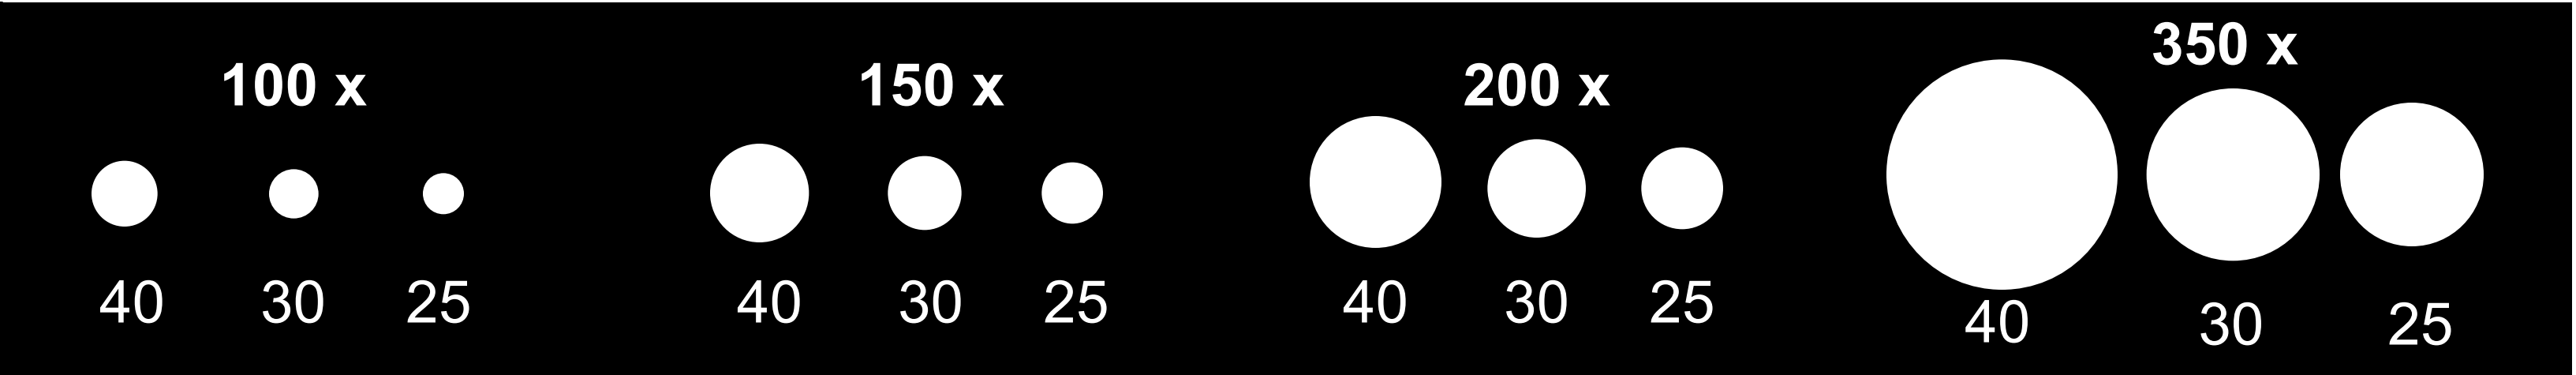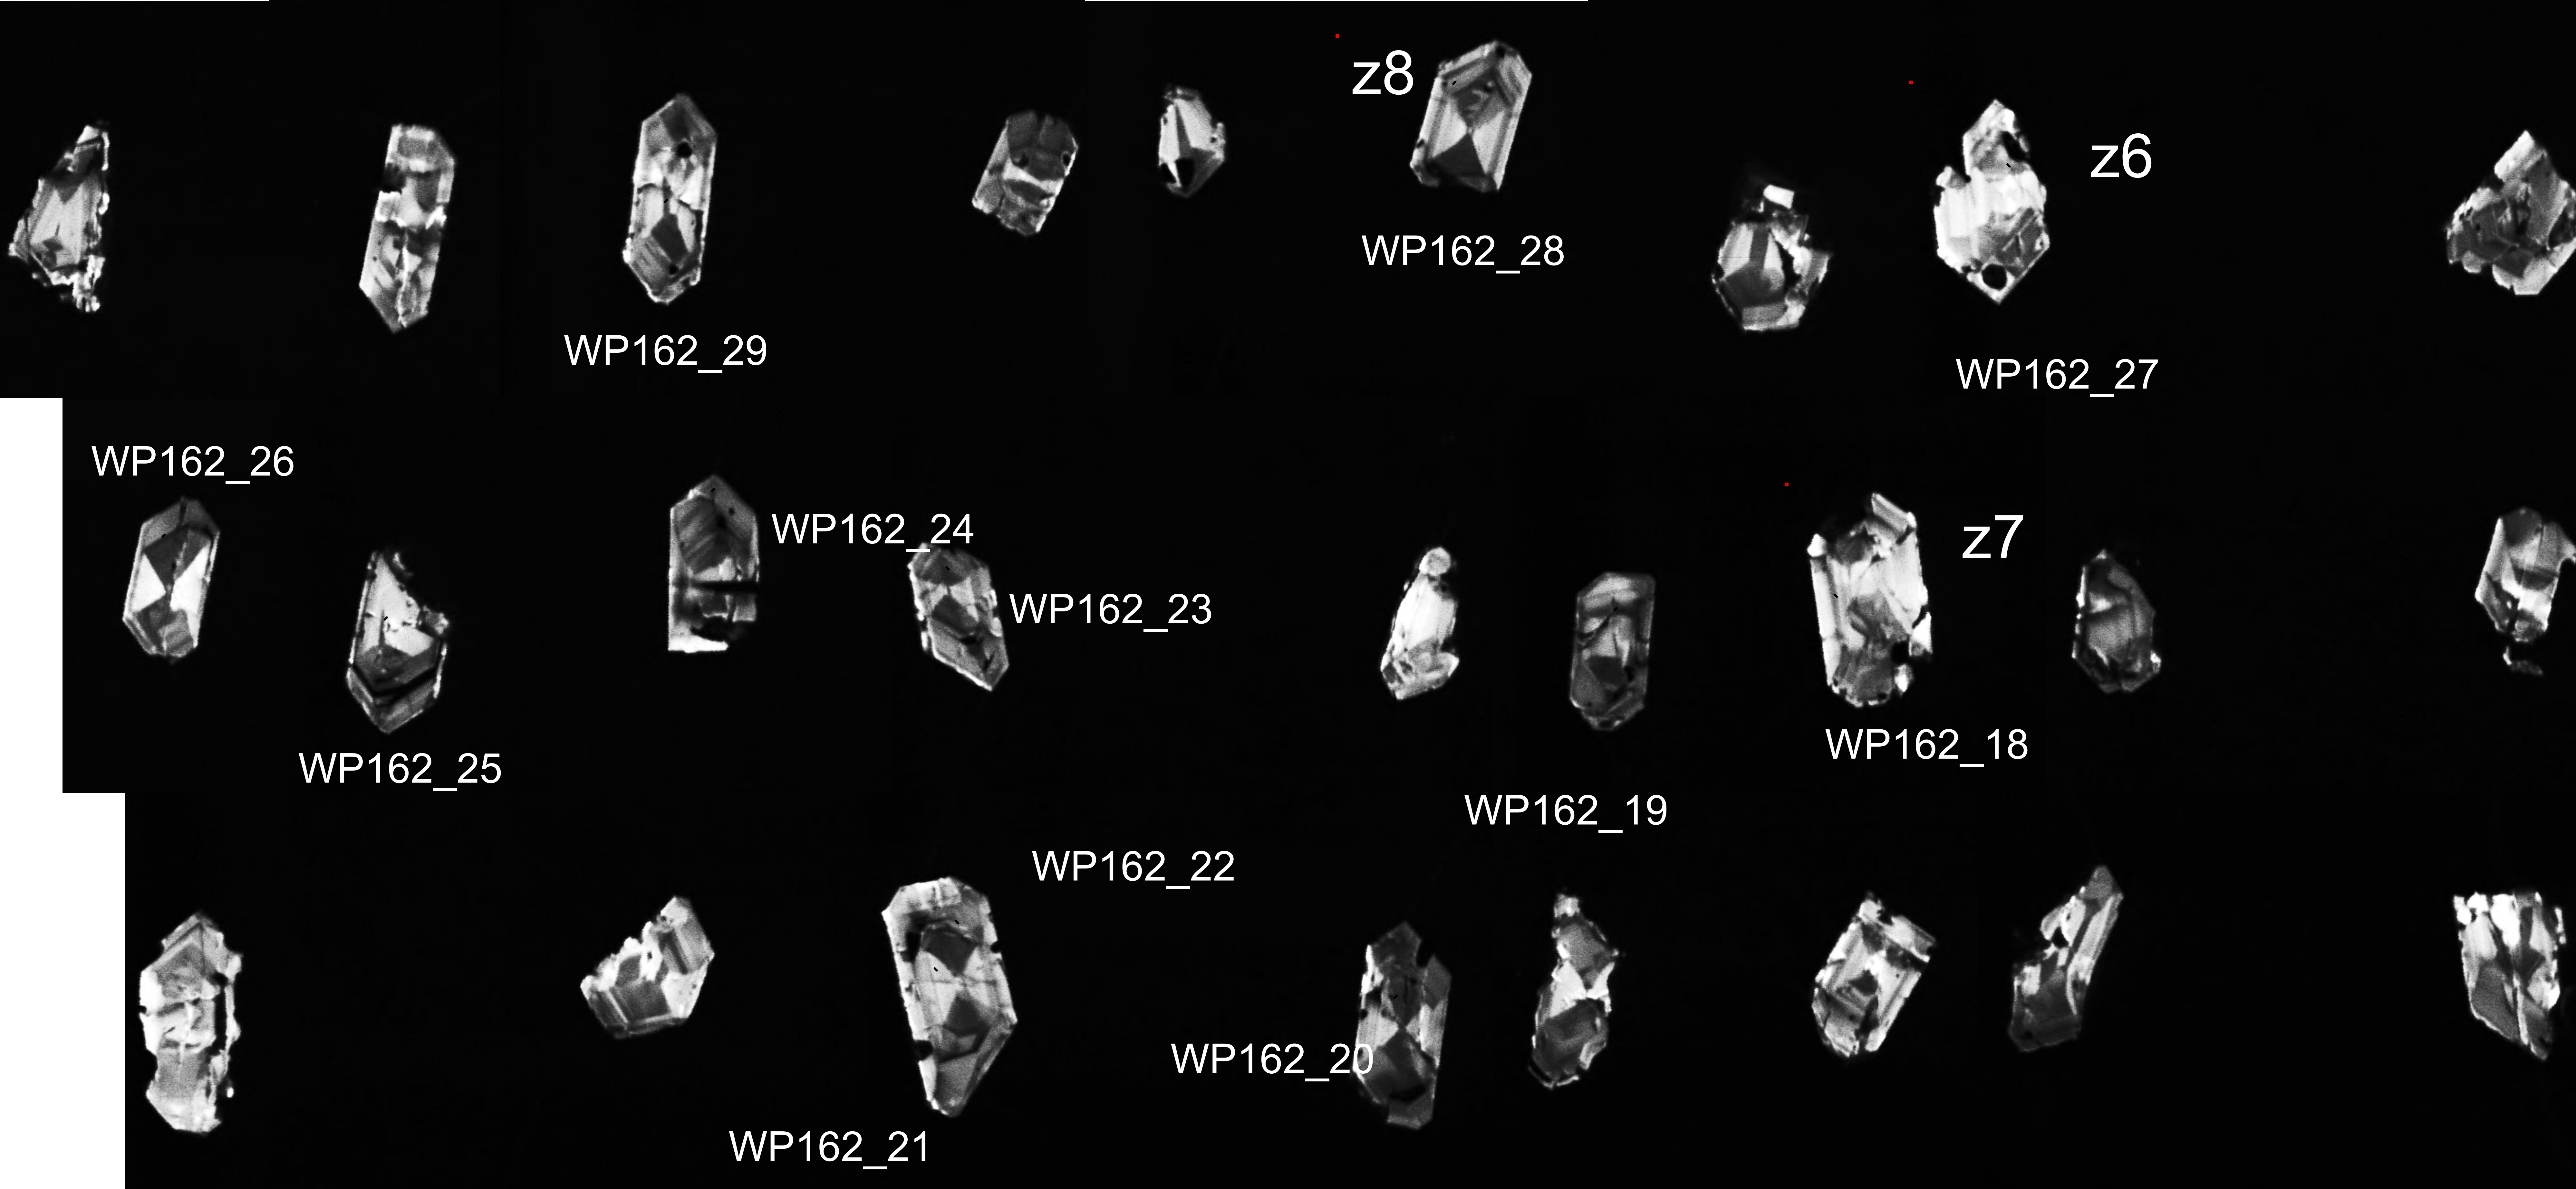



WP16-2 (row 5) 150x

01/27/2017

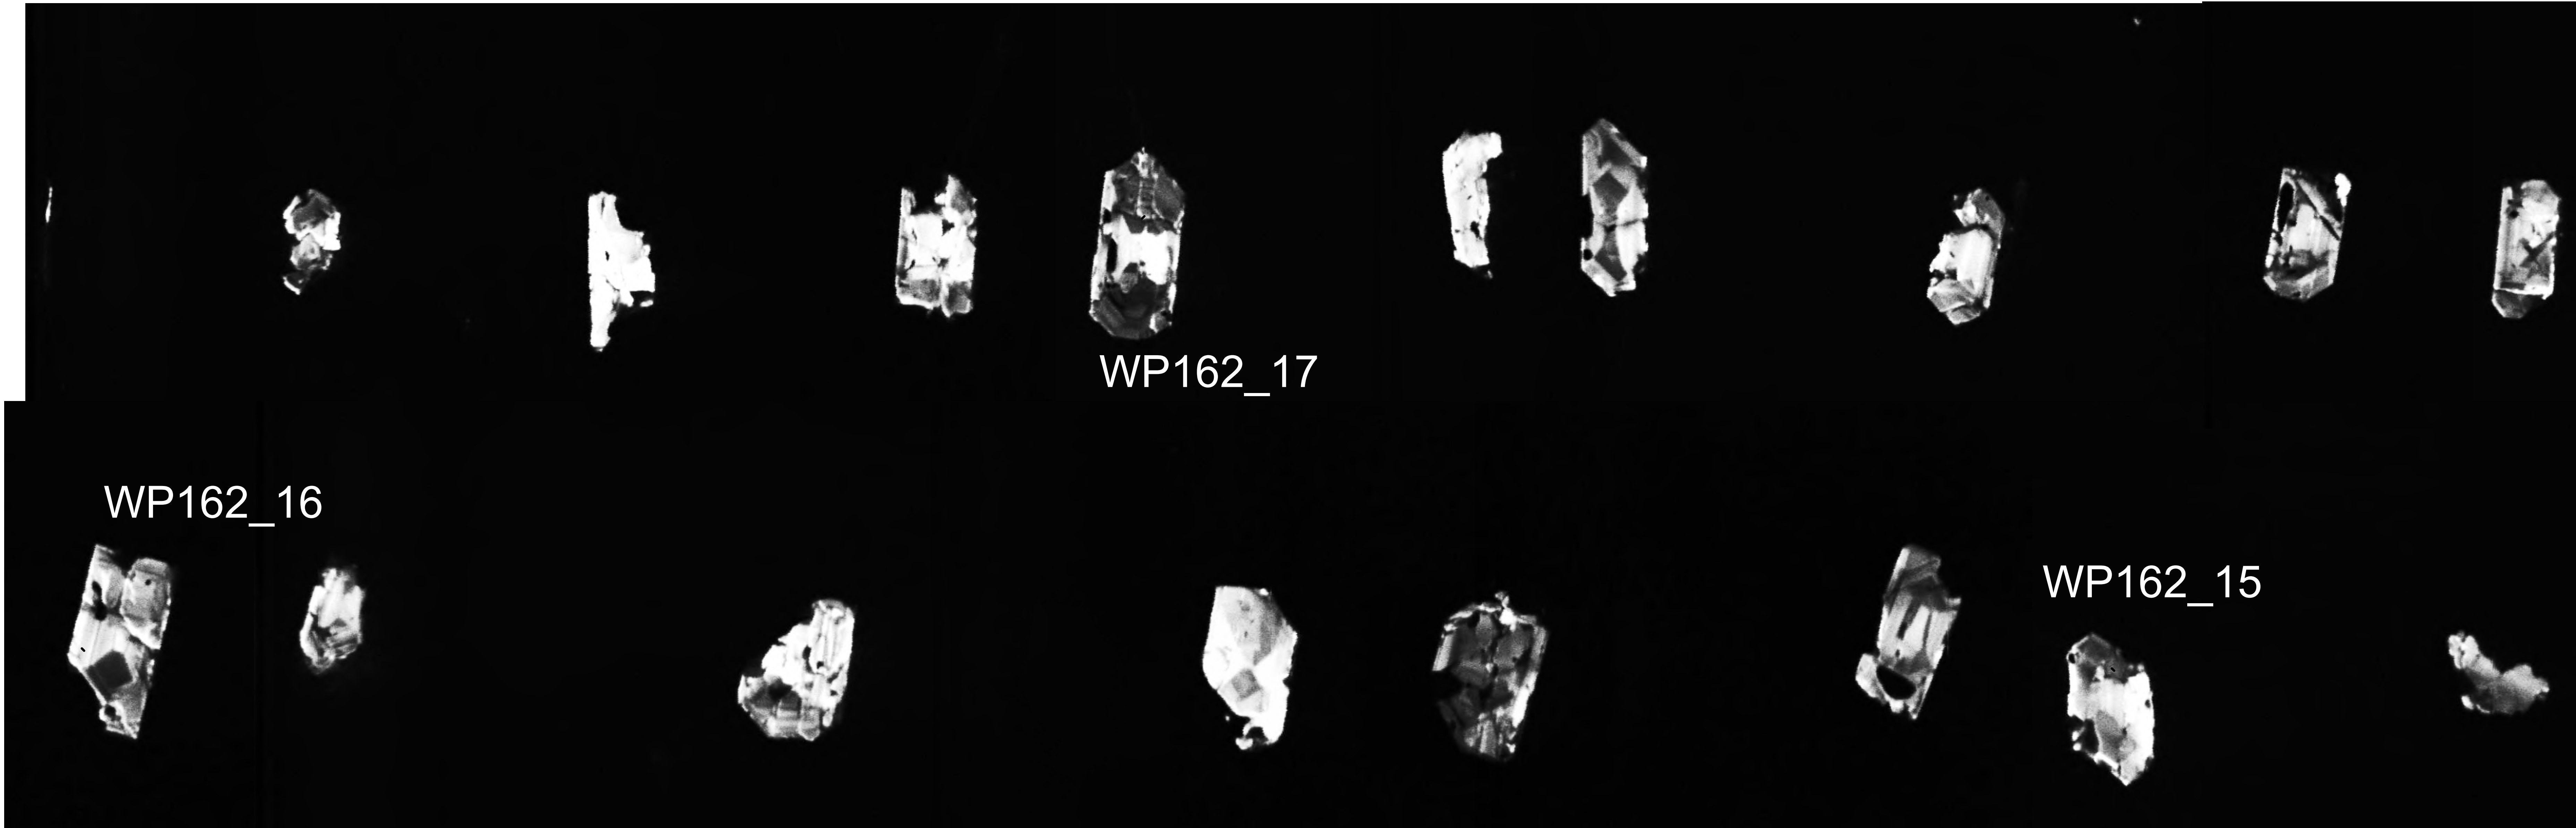



WP16-2 (row 6) 150x

01/27/2017



WP162\_14

WP162\_13

z5

WP162\_12

WP162\_10

WP162\_11

WP162\_9

z1  
WP162\_8

WP162\_6

z3

z4

WP162\_7

z2

WP162\_5

WP162\_4

WP162\_2

WP162\_3

WP162\_1



WP18-1 (row 1) 150x

06/30/18

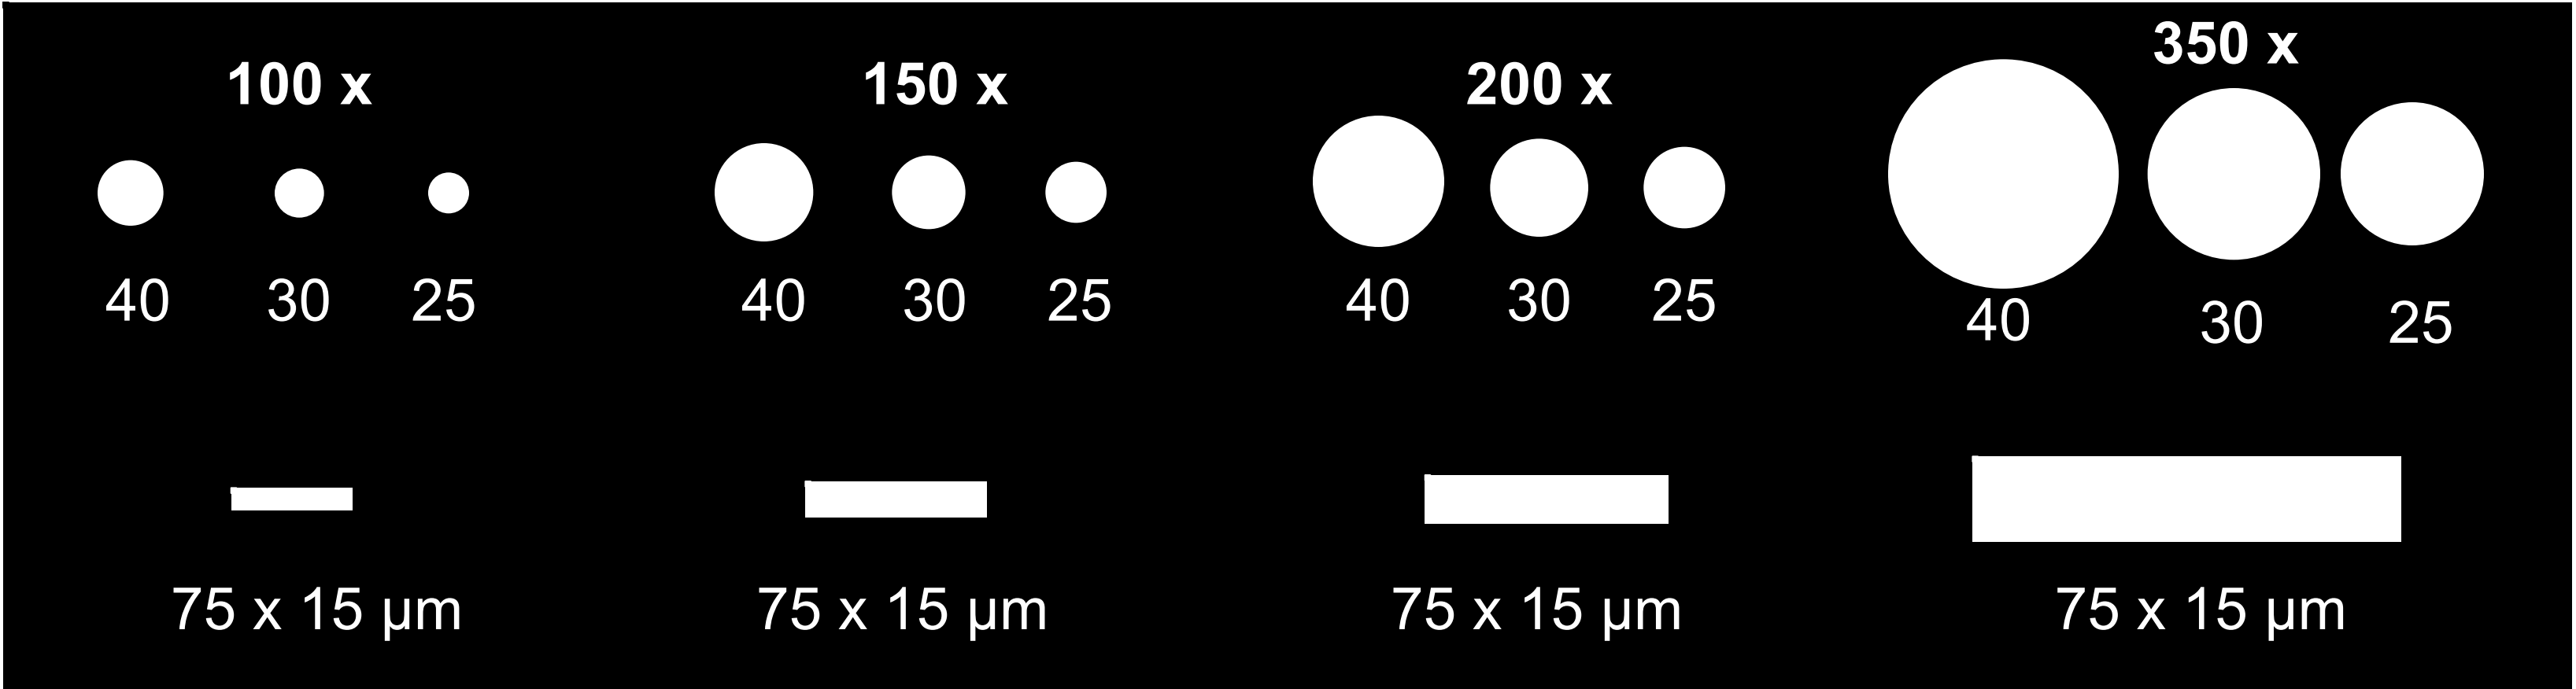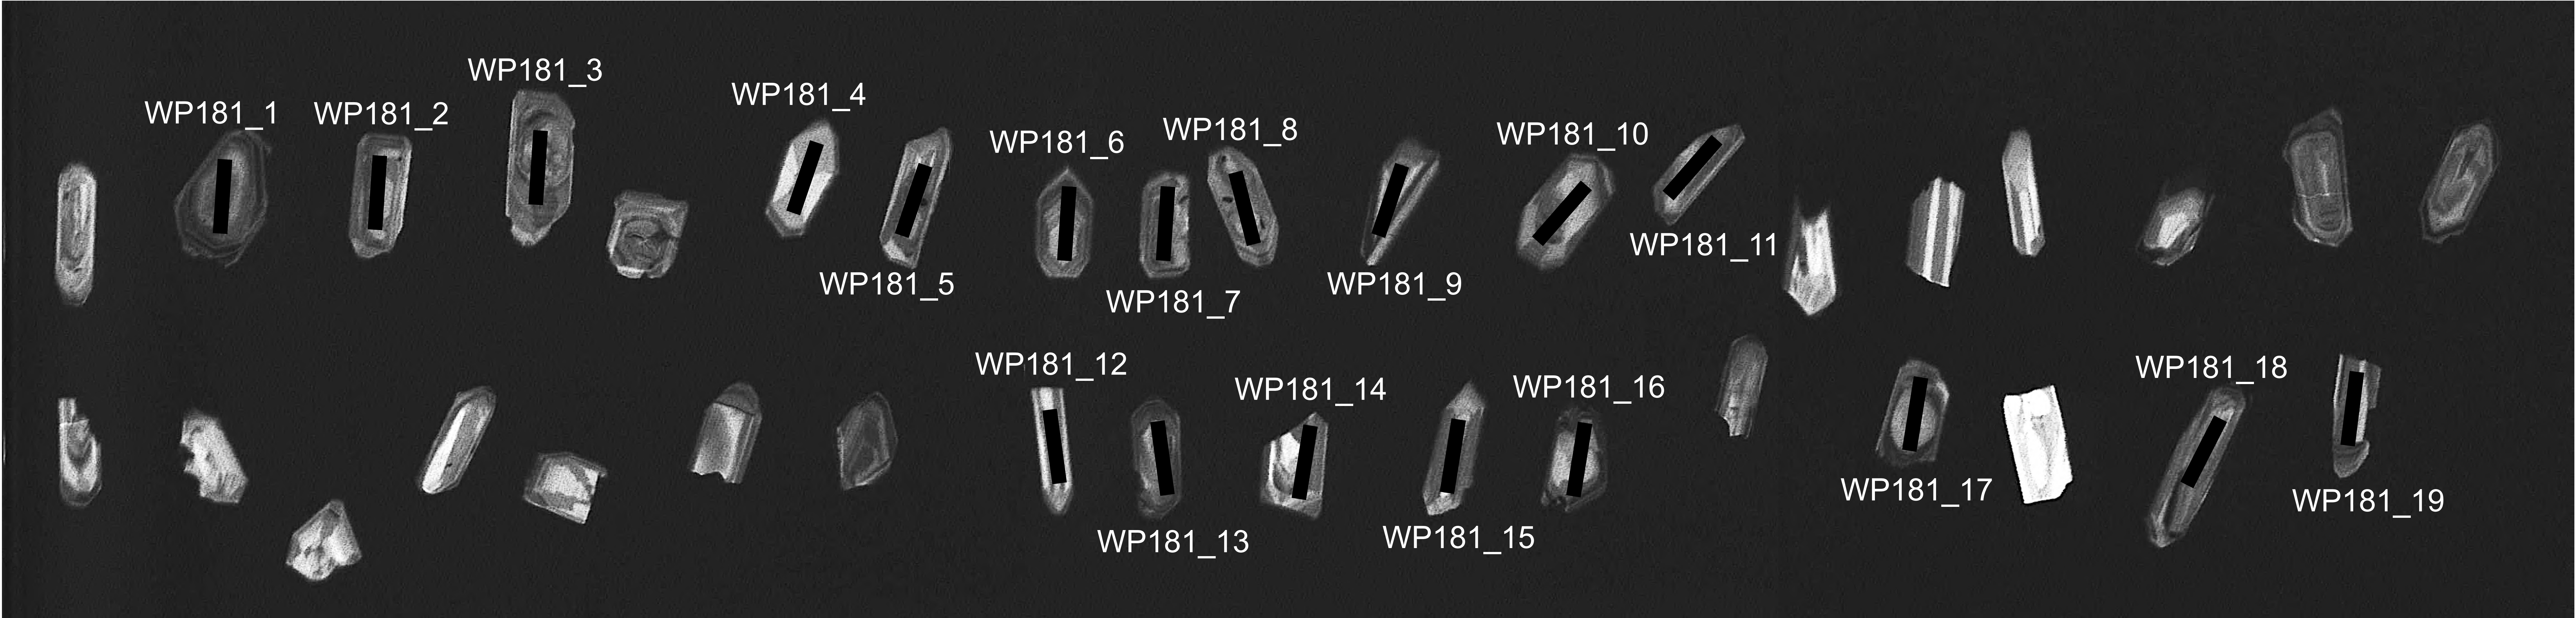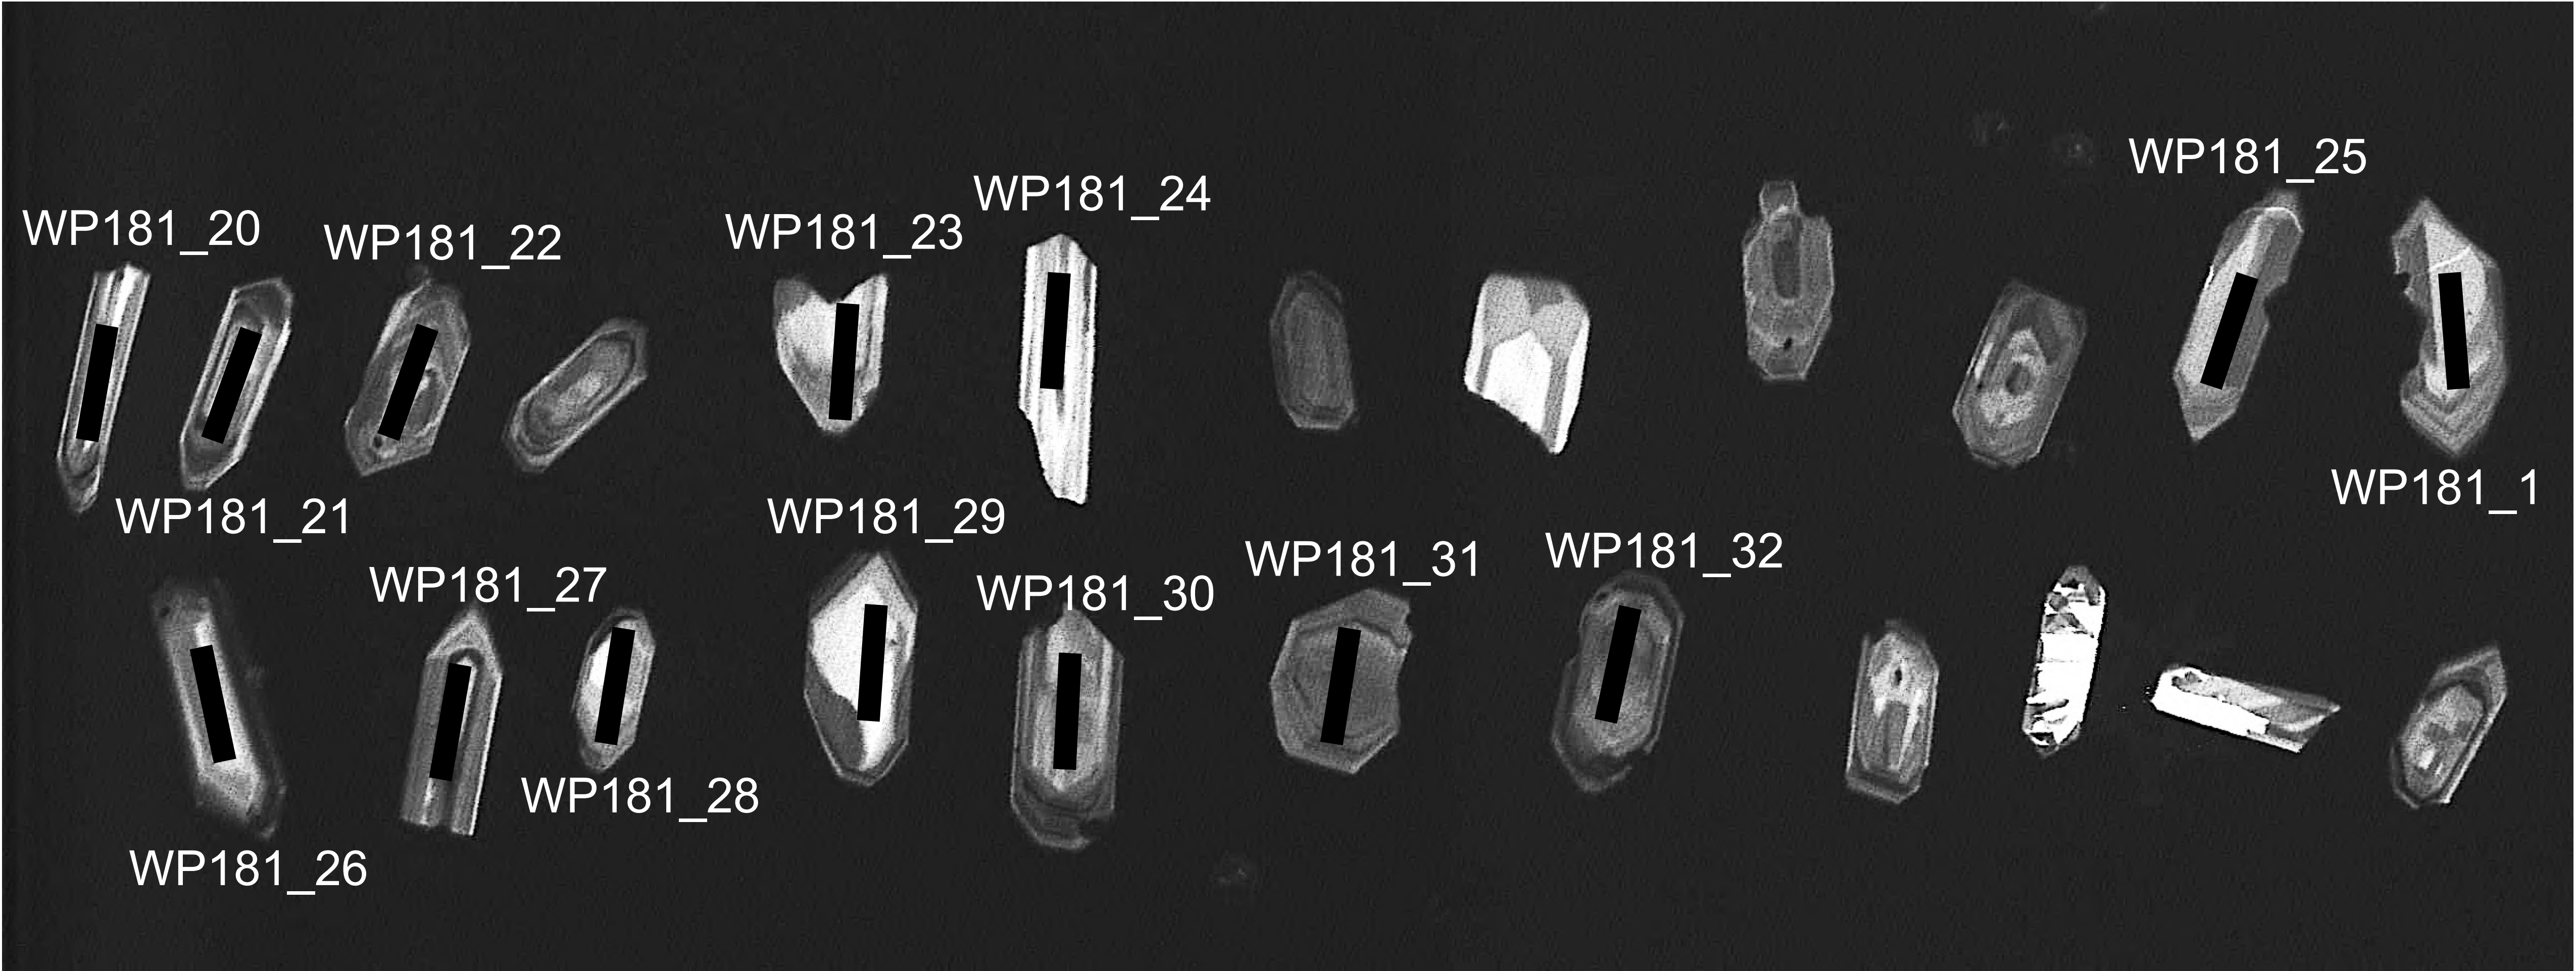



WP18-1 (row 2) 150x

06/30/18

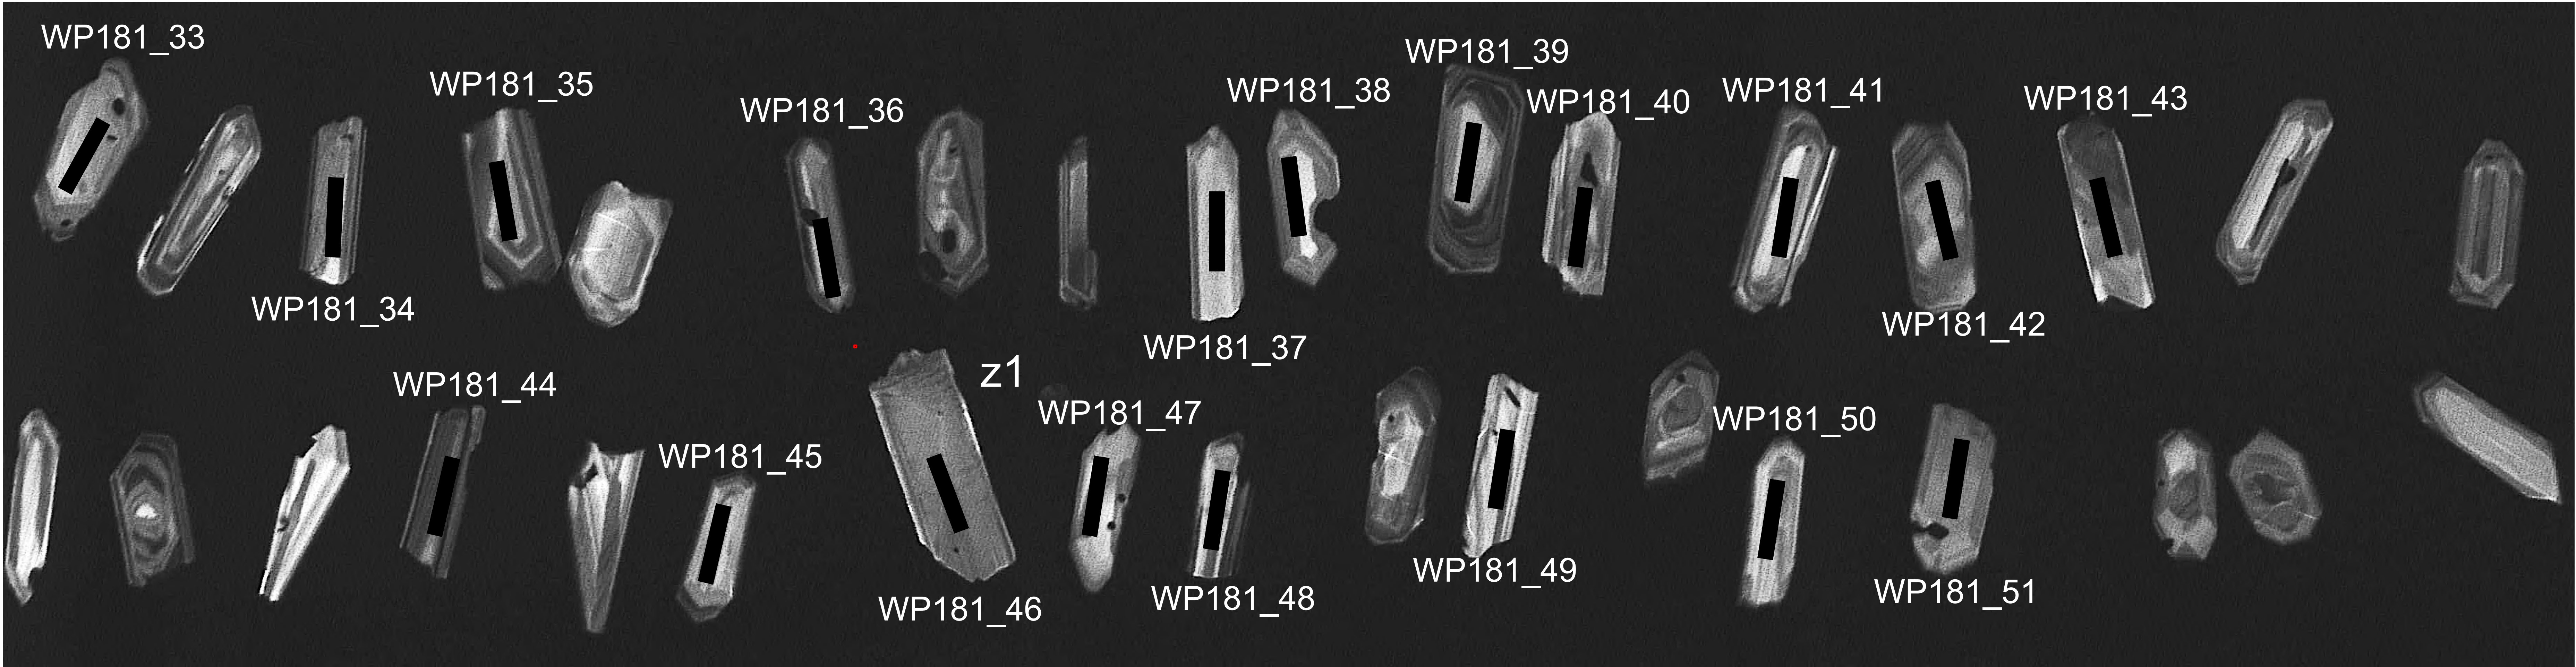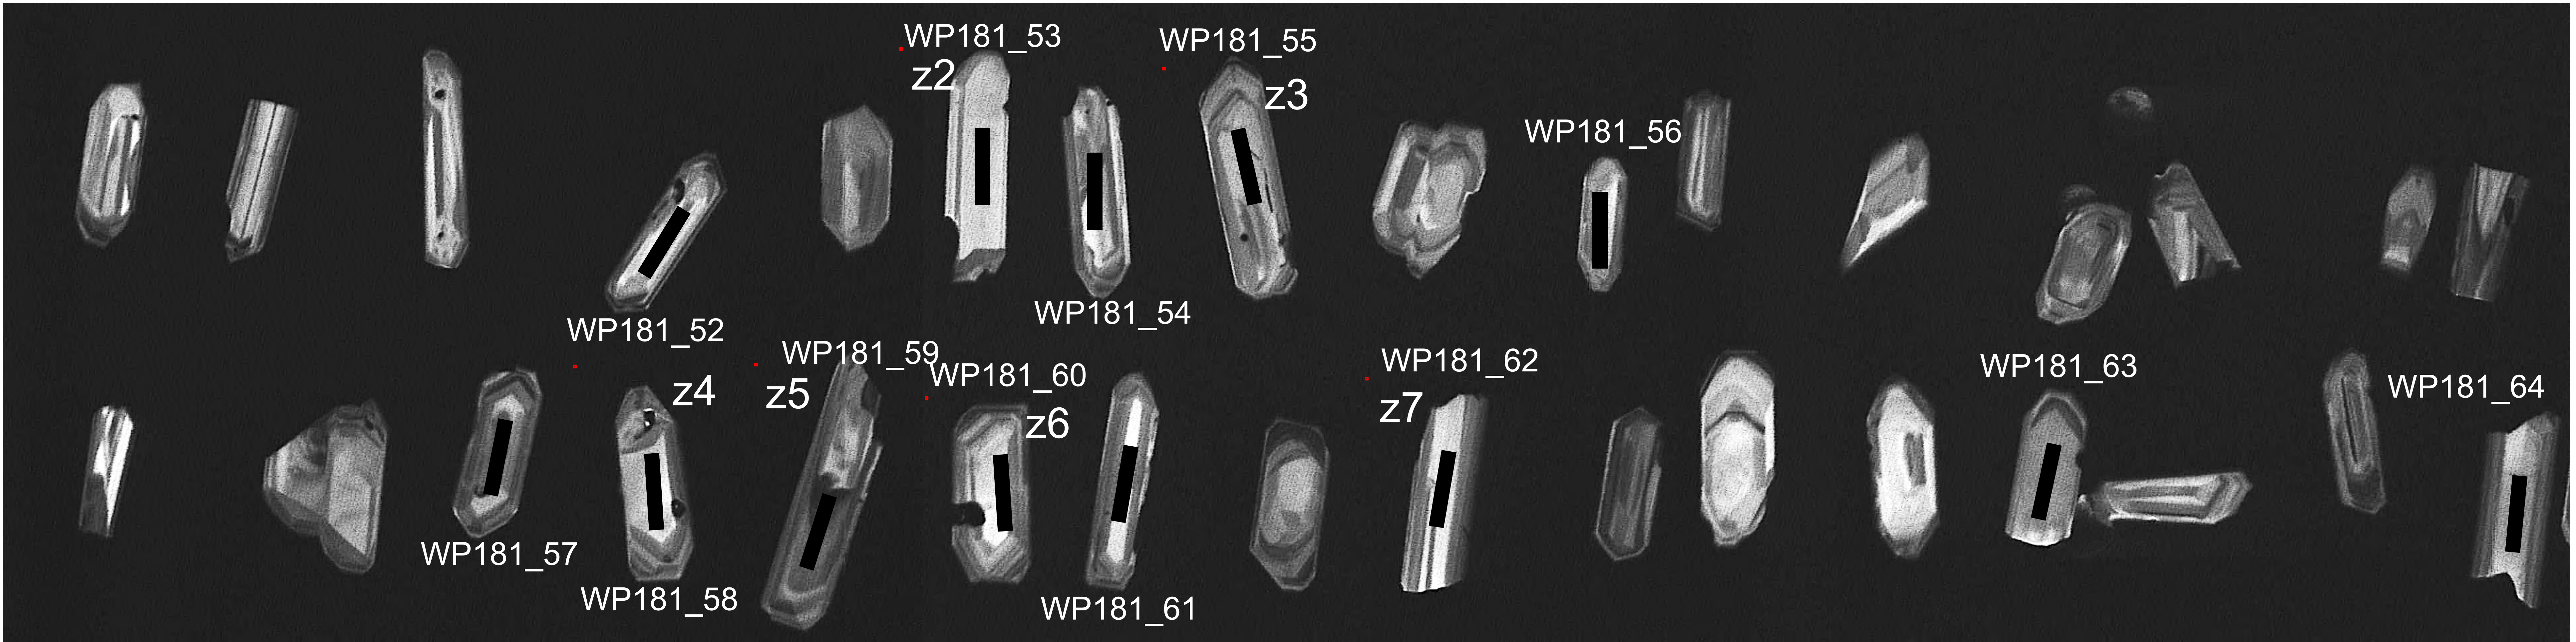



WP18-1 (row 3) 150x 06/30/18

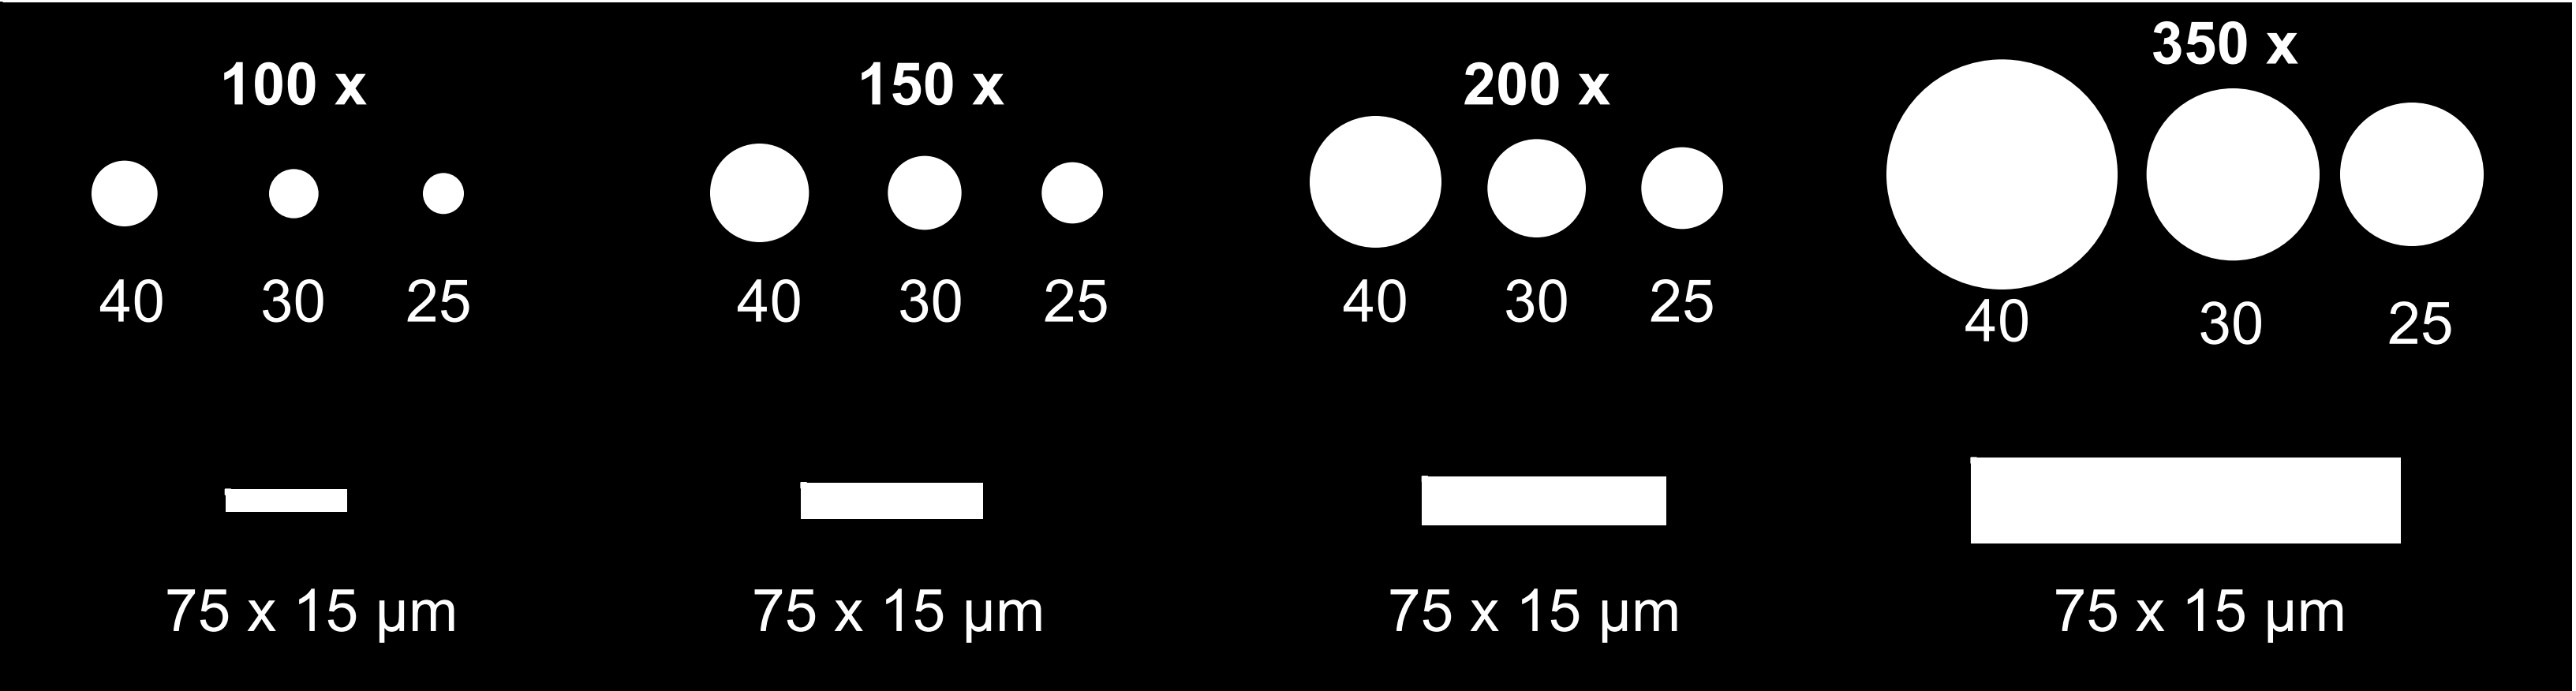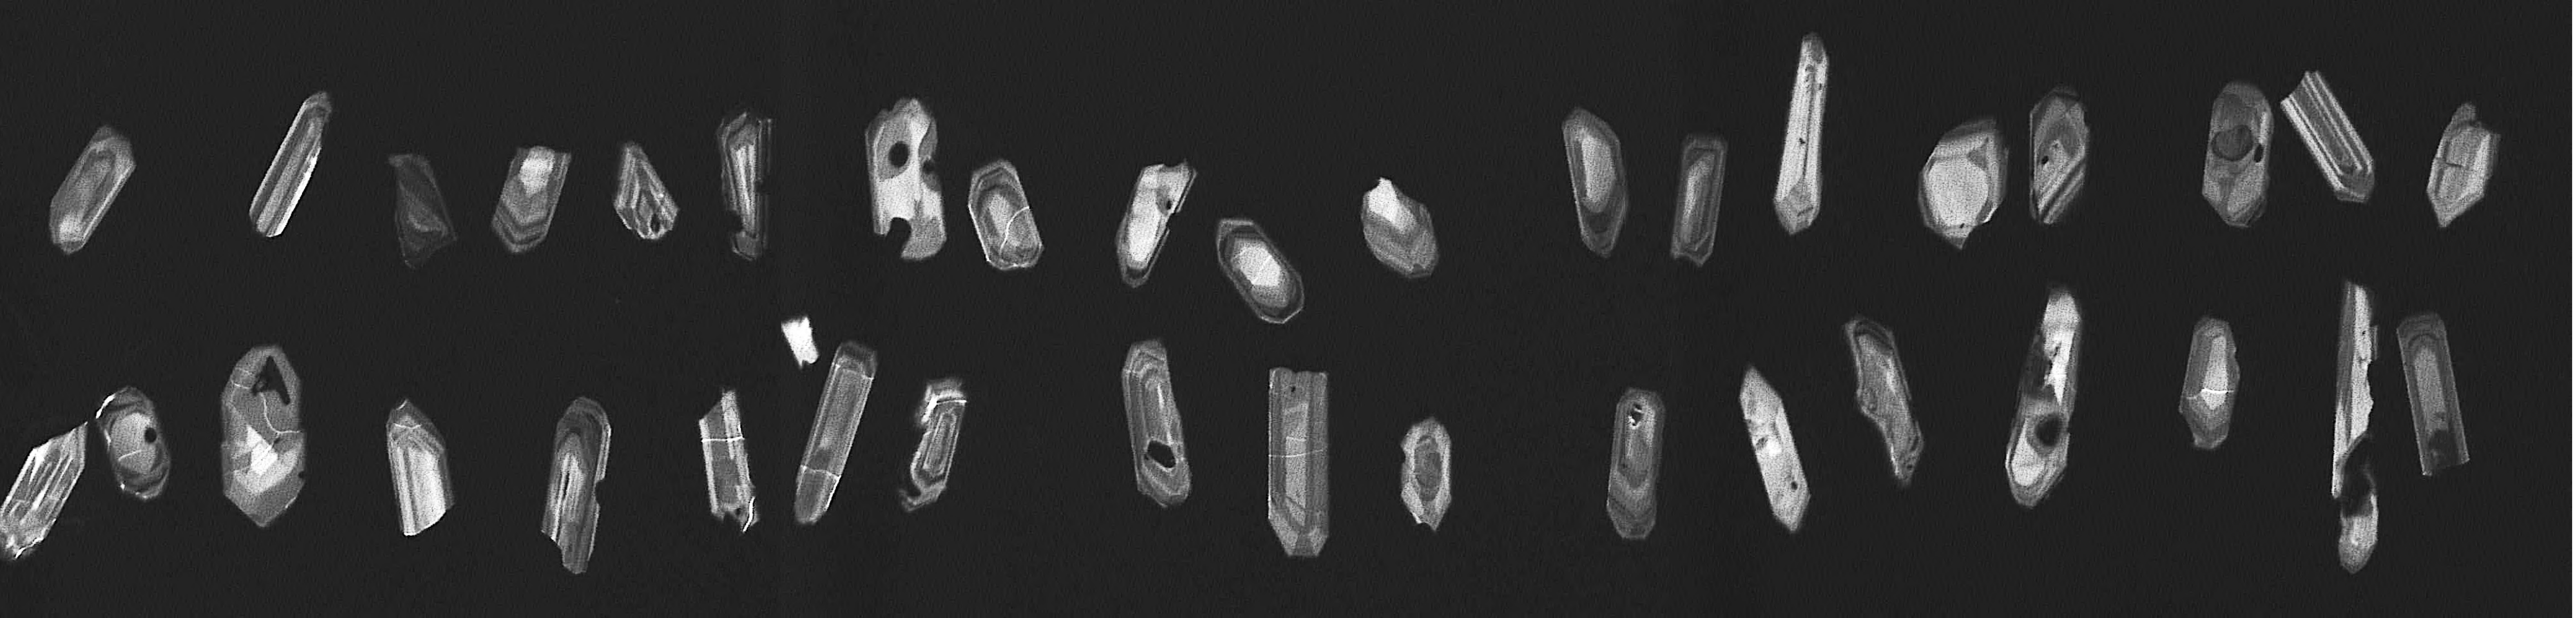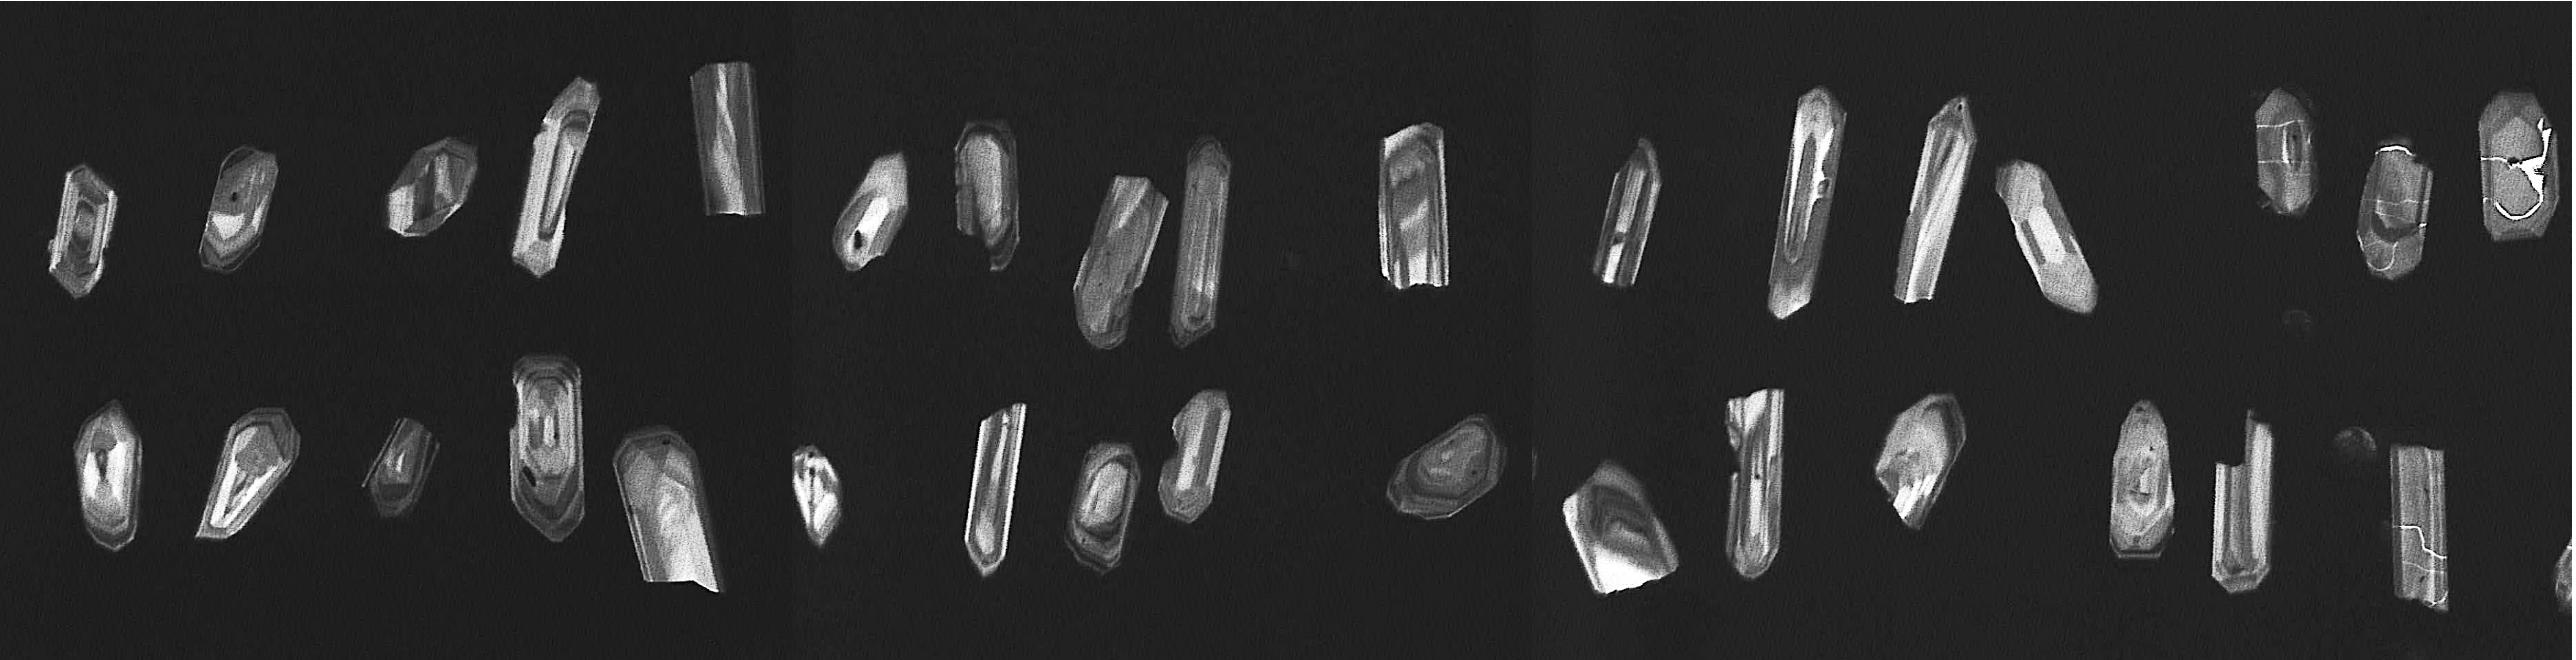



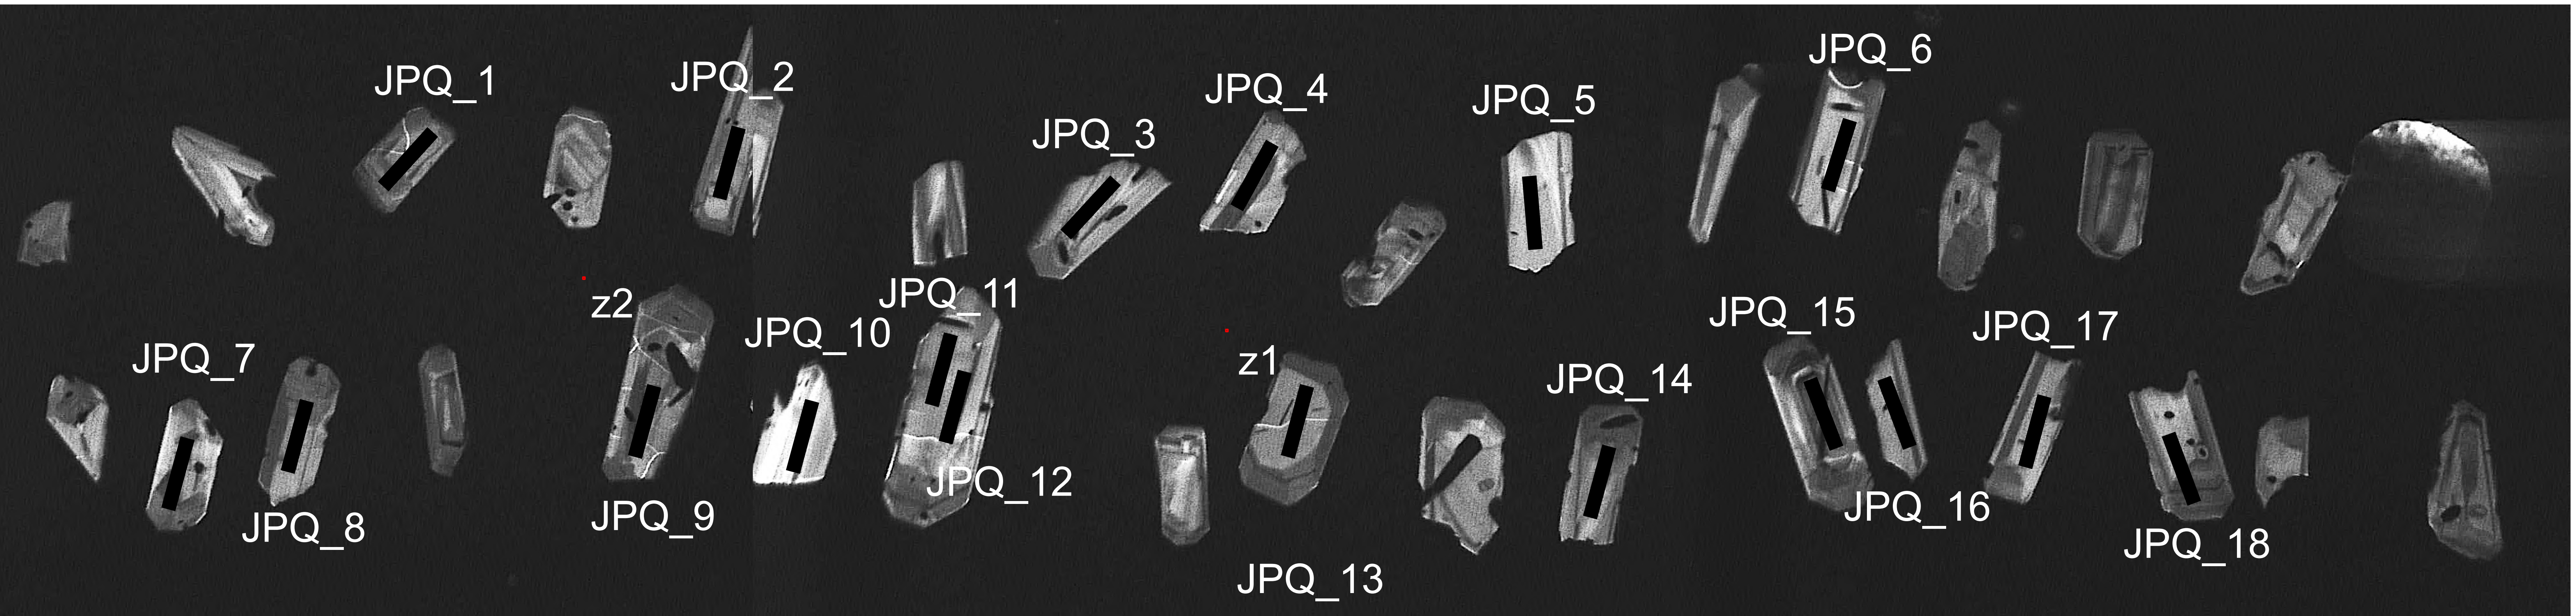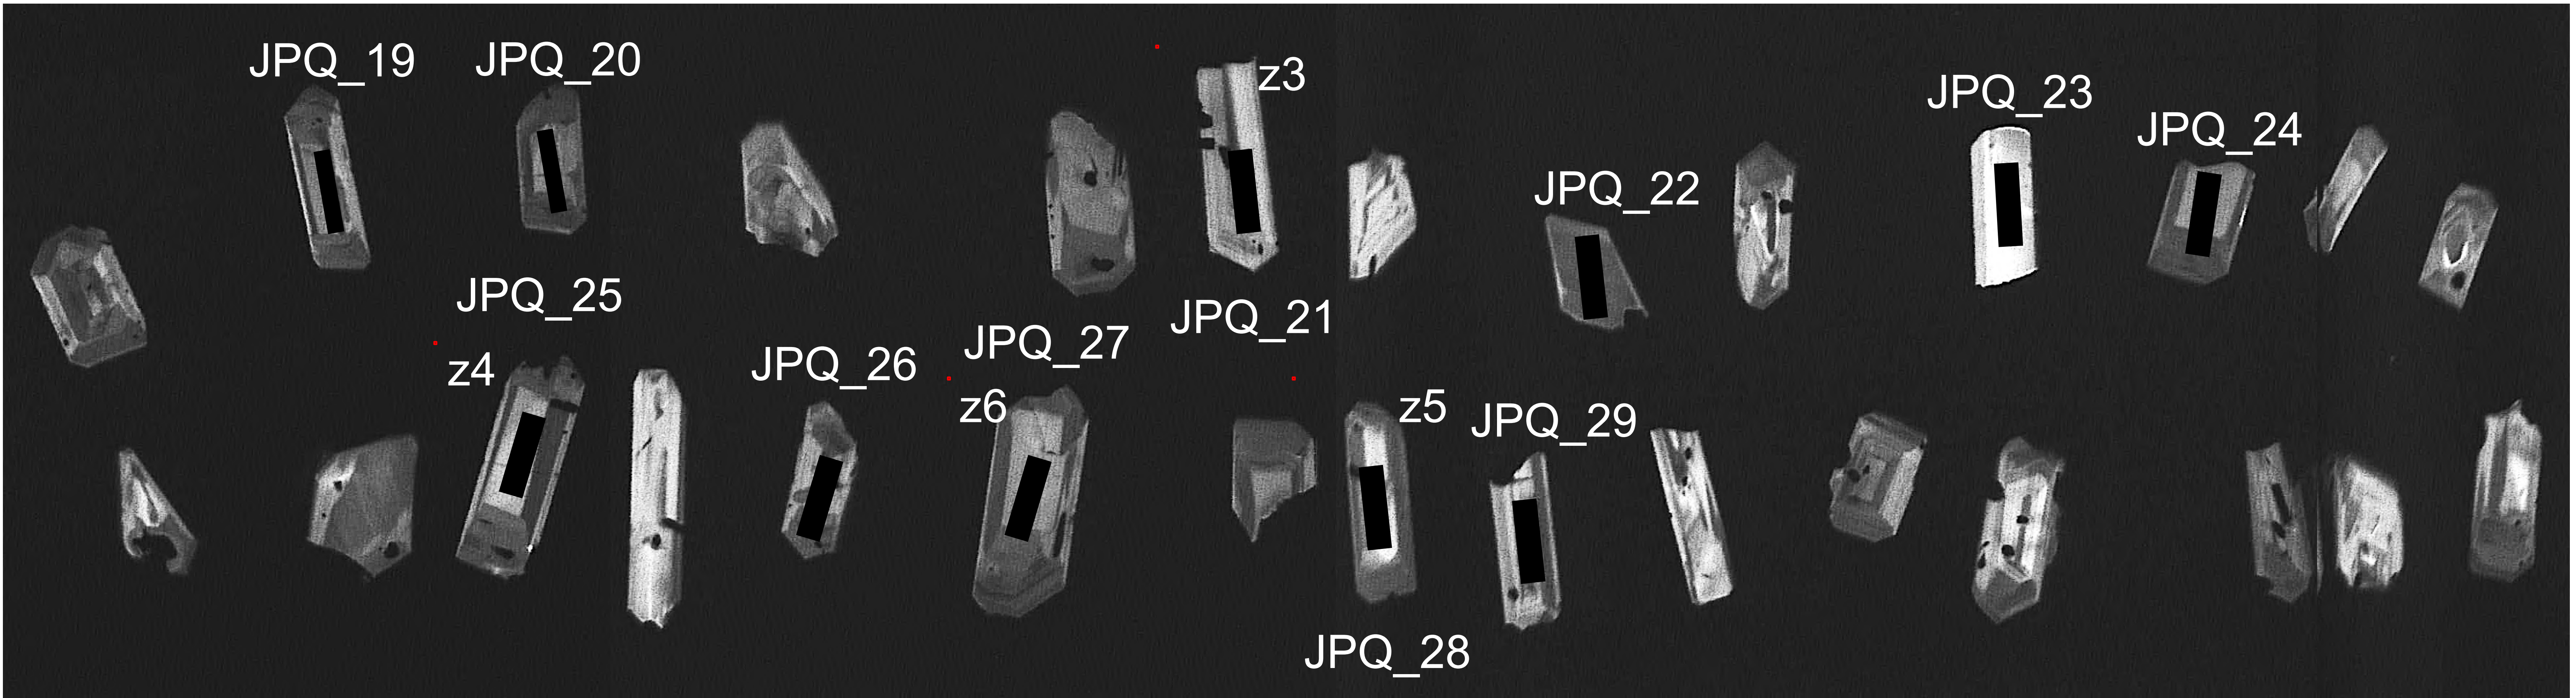



JPQ (row 2)

150x

06/30/18

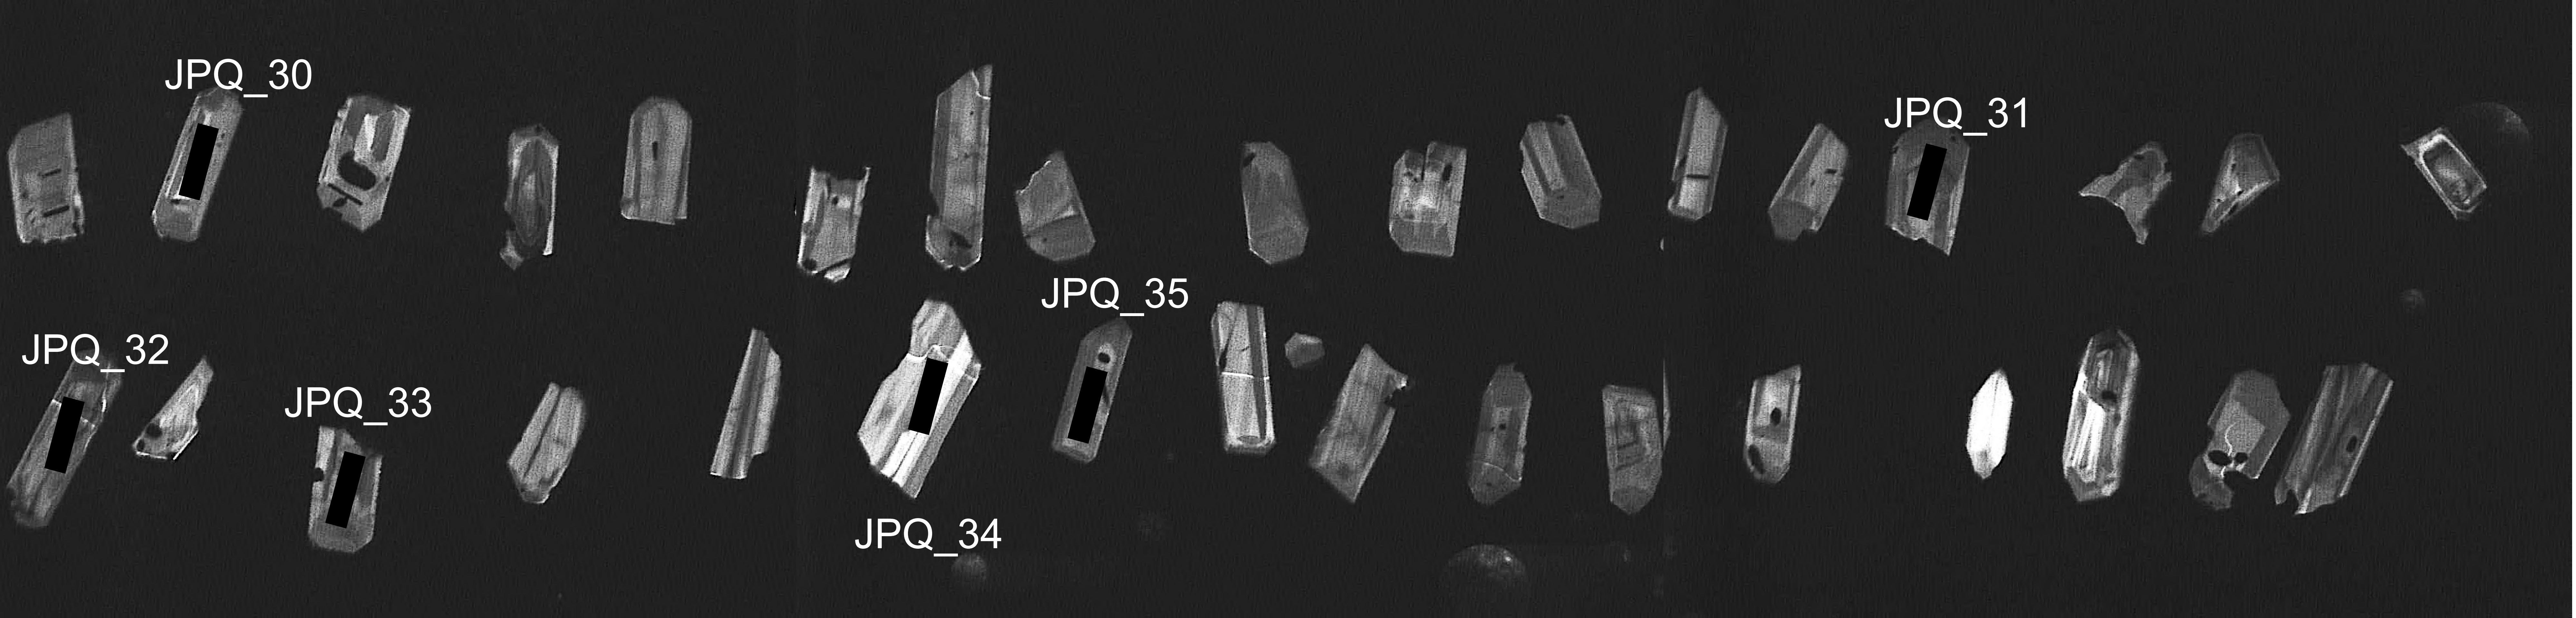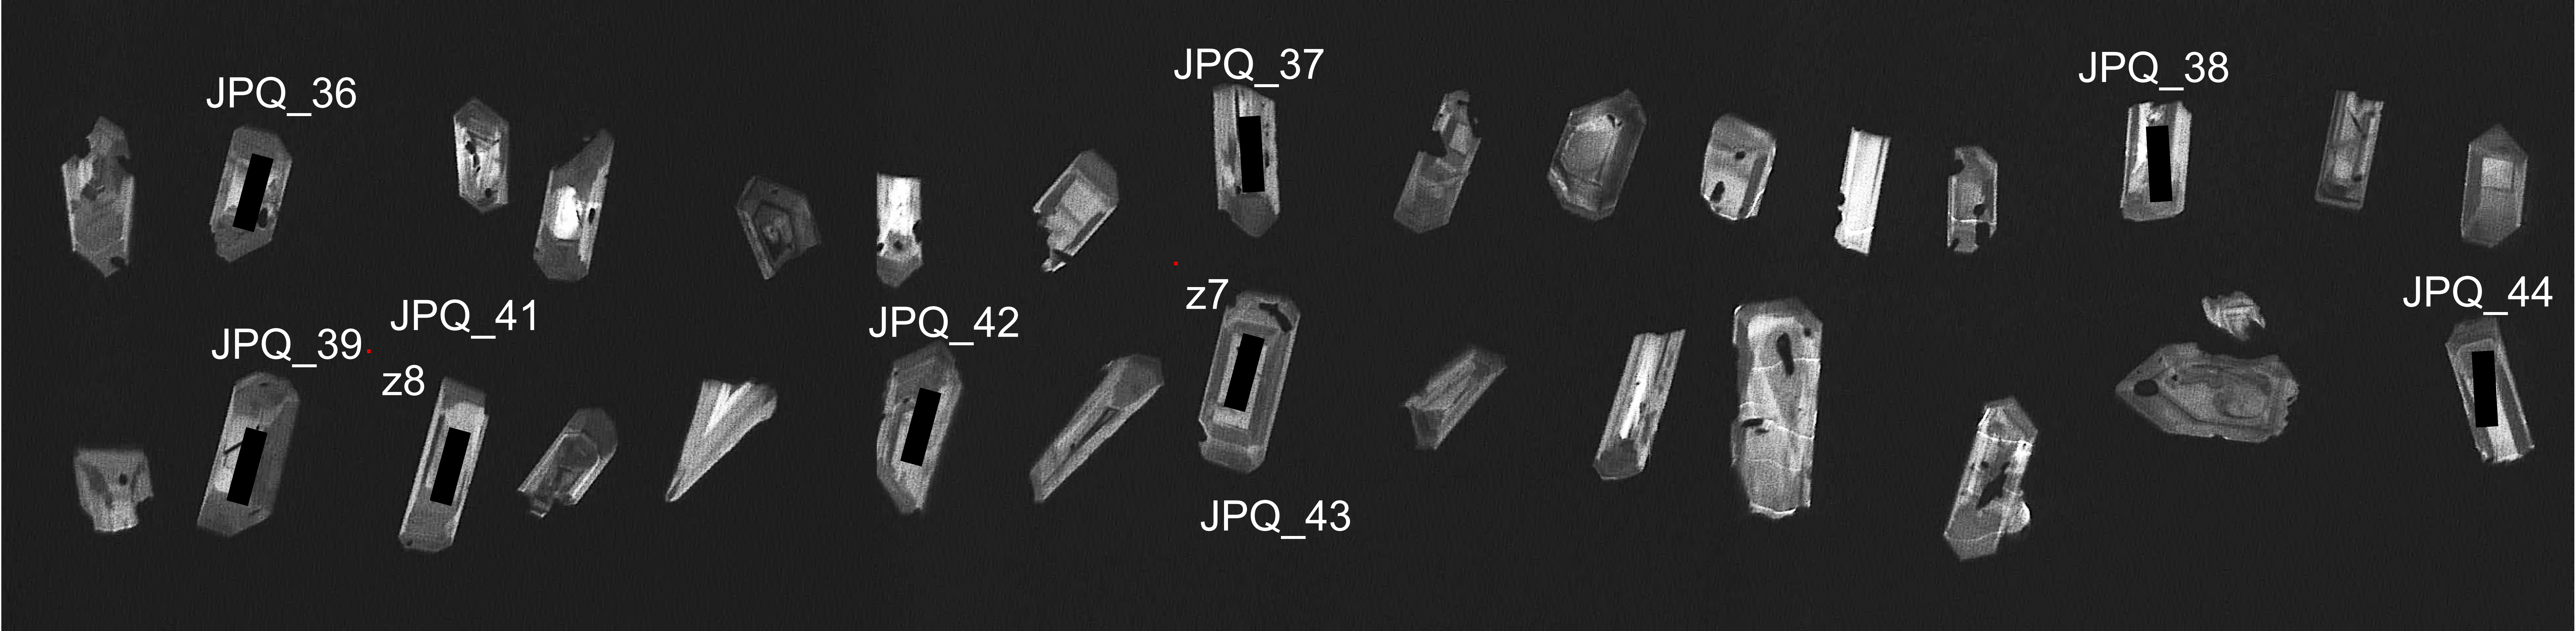



JPQ (row 3)

150x

06/30/18

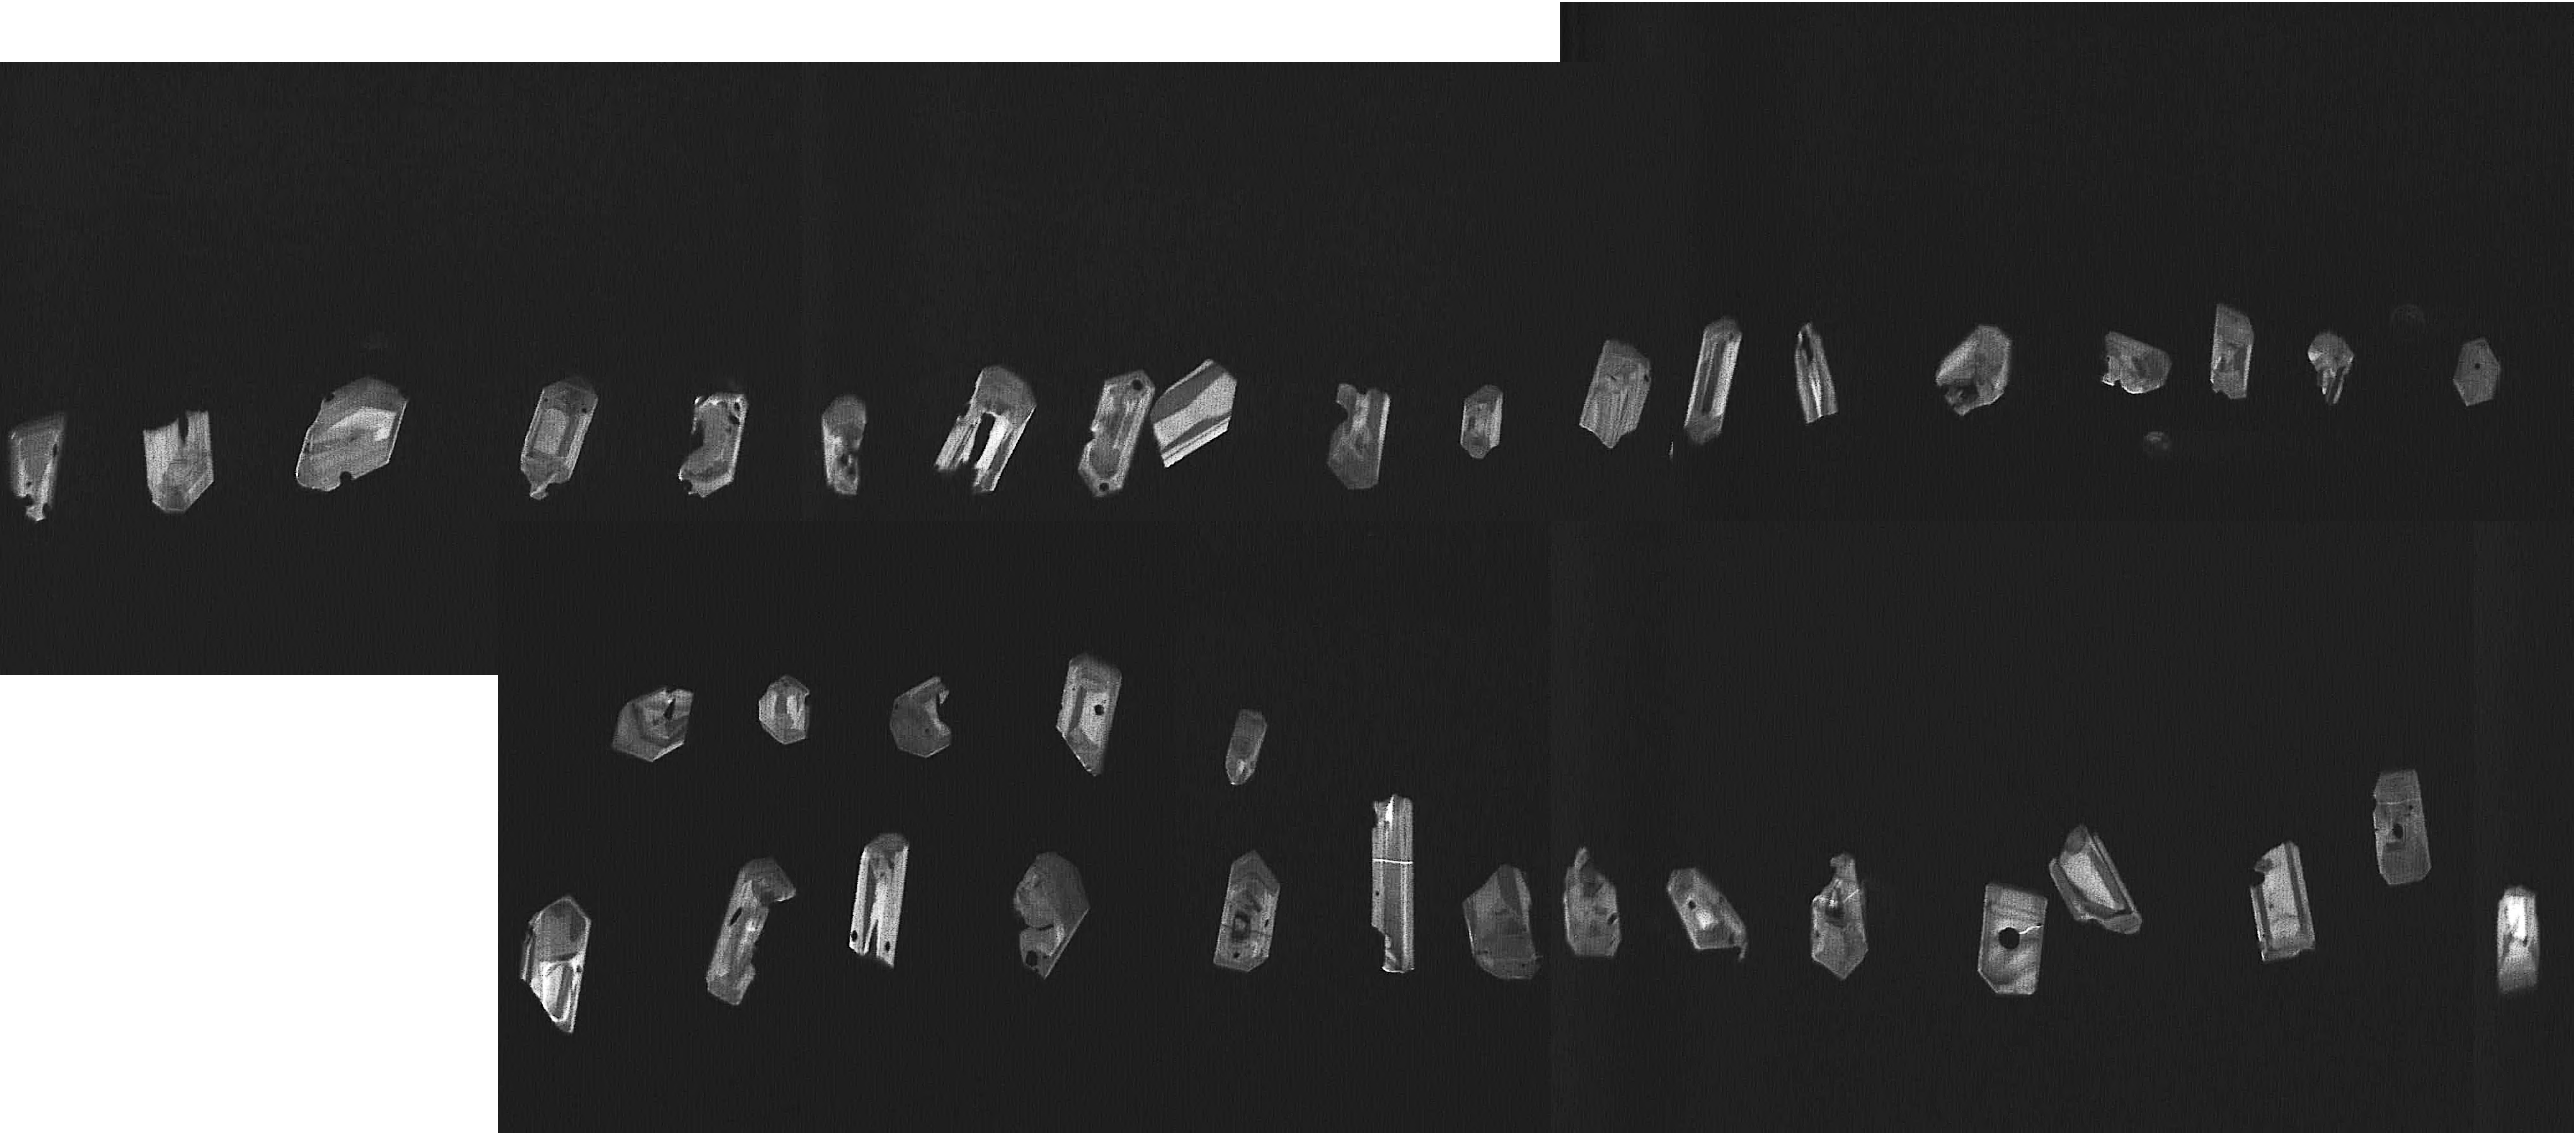

Supplement: Supplementary file 1 [file 1]
